# Supplementary material for: Transcriptome Analysis of the Inhibitory Effects of 20(S)-Protopanaxadiol on NCI-H1299 Non-Small Cell Lung Cancer Cells
Source: MDPI journal article supplement (doi:10.3390/molecules28155746), 2023-07-29
Supplement: s1 [file s1]

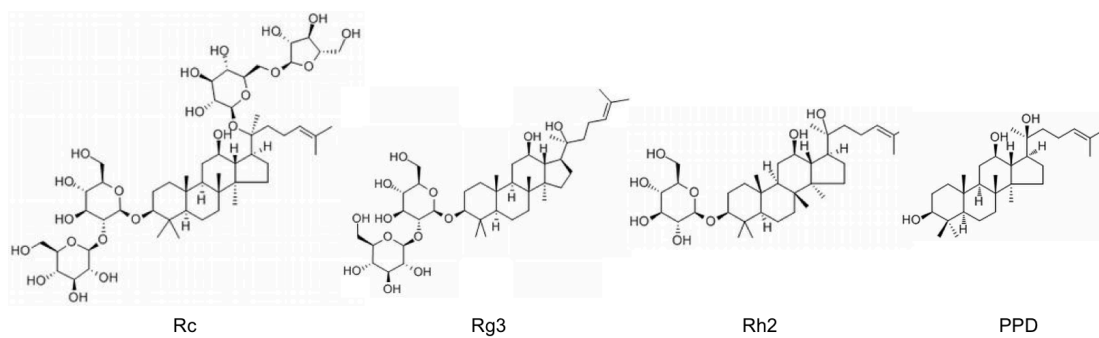

Figure S1. Molecular structures of PPD and ginsenosides Rc, Rg3 and Rh2. The molecular structure graphs were downloaded from the website of Shanghai Yuanye Biotechnology Co., Ltd (<https://www.shyuanye.com/>, accessed on 5 May 2023).
