# Supplementary material for: Transcriptome Analysis of the Inhibitory Effects of 20(S)-Protopanaxadiol on NCI-H1299 Non-Small Cell Lung Cancer Cells
Source: MDPI journal article supplement (doi:10.3390/molecules28155746), 2023-07-29
Supplement: s1 [file s1]

**Filename: N1900946-1-9-20190219-2200.RNA**

## Gel Images

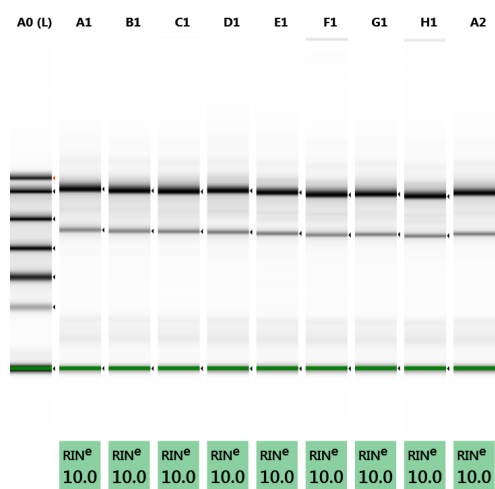

D1: 20(S)-PPD-1  
 E1: 20(S)-PPD-2  
 F1: 20(S)-PPD-3  
 G1: Control-1  
 H1: Control-2  
 A2: Control-3

Default image (Contrast 50%), Image is Scaled to Sample, Image is Scaled to view larger Molecular Weight range

## Sample Info

| Well | RIN <sup>e</sup> | 28S/18S (Area) | Conc. [ng/μl] | Sample Description | Alert | Observations |
|------|------------------|----------------|---------------|--------------------|-------|--------------|
| A0   | -                | -              | 97.5          | Electronic Ladder  |       | Ladder       |
| A1   | 10.0             | 2.9            | 124           | R1 25XDilution     |       |              |
| B1   | 10.0             | 2.8            | 129           | R2 19XDilution     |       |              |
| C1   | 10.0             | 3.1            | 129           | R3 20XDilution     |       |              |
| D1   | 10.0             | 2.8            | 112           | S1 28XDilution     |       |              |
| E1   | 10.0             | 2.8            | 103           | S2 17XDilution     |       |              |
| F1   | 10.0             | 2.9            | 120           | S3 21XDilution     |       |              |
| G1   | 10.0             | 3.0            | 97.4          | CON-1 21XDilution  |       |              |
| H1   | 10.0             | 3.0            | 116           | CON-2 22XDilution  |       |              |
| A2   | 10.0             | 3.4            | 94.3          | CON-3 11XDilution  |       |              |

**A0: Electronic Ladder**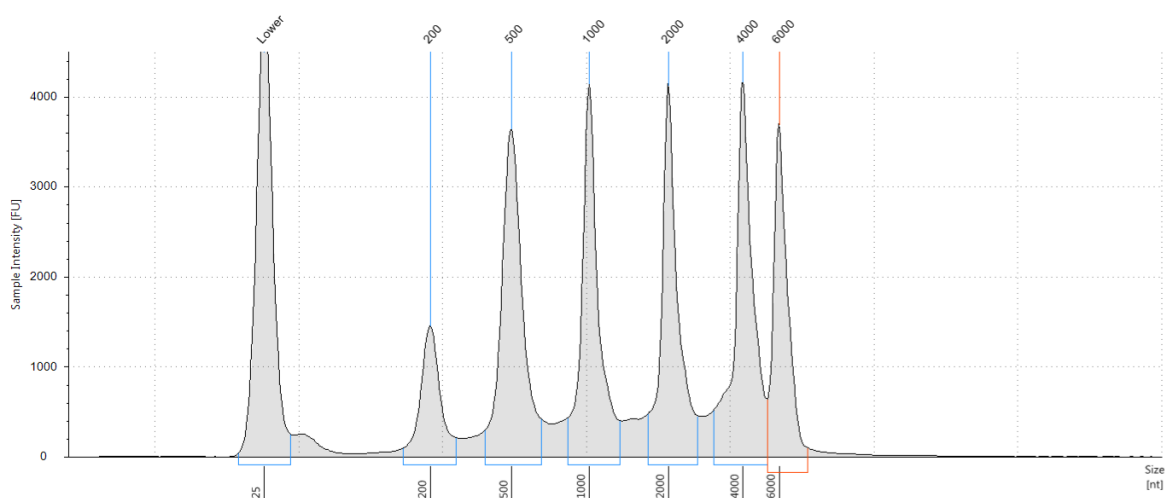**Sample Table**

| Well | RINe | 28S/18S (Area) | Conc. [ng/μl] | Sample Description | Alert | Observations |
|------|------|----------------|---------------|--------------------|-------|--------------|
| A0   | -    | -              | 97.5          | Electronic Ladder  |       | Ladder       |

**Peak Table**

| Size [nt] | Calibrated Conc. [ng/μl] | Assigned Conc. [ng/μl] | Peak Molarity [nmol/l] | % Integrated Area | Peak Comment | Observations |
|-----------|--------------------------|------------------------|------------------------|-------------------|--------------|--------------|
| 25        | 40.0                     | 40.0                   | 4710                   | -                 |              | Lower Marker |
| 200       | 6.82                     | -                      | 100                    | 7.80              |              |              |
| 500       | 18.3                     | -                      | 107                    | 20.88             |              |              |
| 1000      | 16.3                     | -                      | 47.9                   | 18.62             |              |              |
| 2000      | 15.8                     | -                      | 23.3                   | 18.11             |              |              |
| 4000      | 17.8                     | -                      | 13.1                   | 20.38             |              |              |
| 6000      | 12.4                     | -                      | 6.10                   | 14.22             |              |              |

**A1: R1 25XDilution**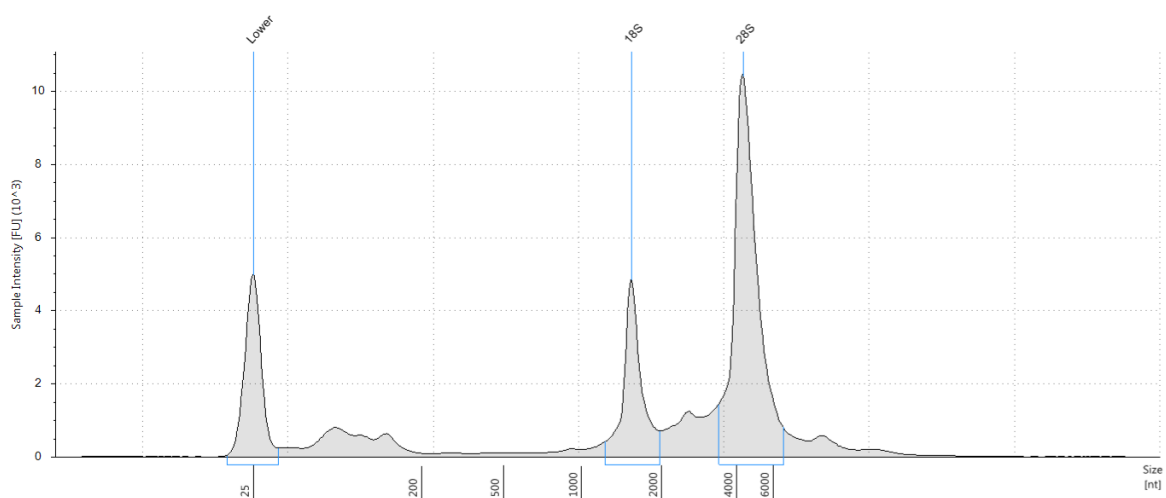**Sample Table**

| Well | RINe | 28S/18S (Area) | Conc. [ng/μl] | Sample Description | Alert | Observations |
|------|------|----------------|---------------|--------------------|-------|--------------|
| A1   | 10.0 | 2.9            | 124           | R1 25XDilution     |       |              |

**Peak Table**

| Size [nt] | Calibrated Conc. [ng/μl] | Assigned Conc. [ng/μl] | Peak Molarity [nmol/l] | % Integrated Area | Peak Comment | Observations |
|-----------|--------------------------|------------------------|------------------------|-------------------|--------------|--------------|
| 25        | 40.0                     | 40.0                   | 4710                   | -                 |              | Lower Marker |
| 1532      | 21.2                     | -                      | 40.8                   | 25.62             |              | 18S          |
| 4266      | 61.7                     | -                      | 42.5                   | 74.38             |              | 28S          |

**B1: R2 19XDilution**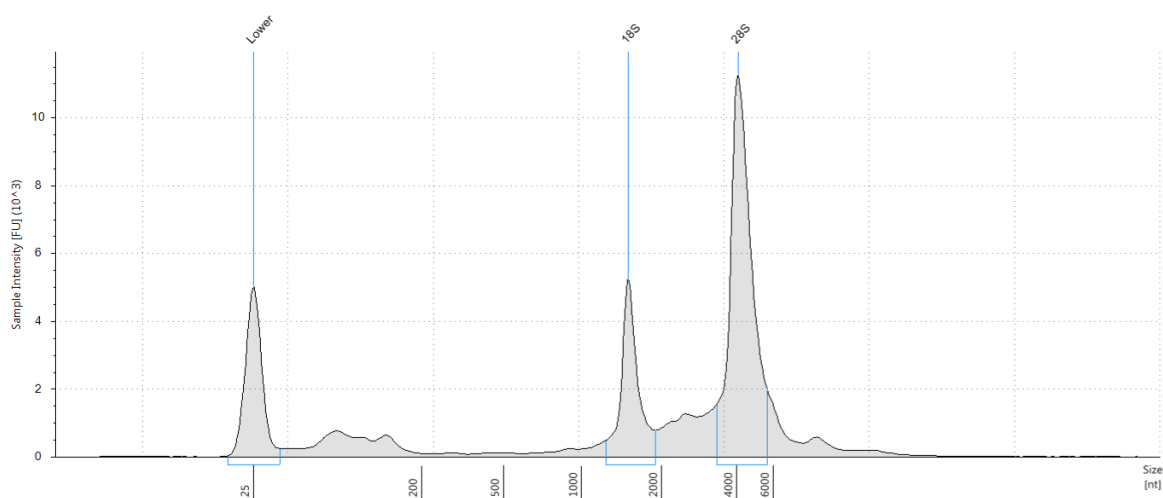**Sample Table**

| Well | RINe | 28S/18S (Area) | Conc. [ng/μl] | Sample Description | Alert | Observations |
|------|------|----------------|---------------|--------------------|-------|--------------|
| B1   | 10.0 | 2.8            | 129           | R2 19XDilution     |       |              |

**Peak Table**

| Size [nt] | Calibrated Conc. [ng/μl] | Assigned Conc. [ng/μl] | Peak Molarity [nmol/l] | % Integrated Area | Peak Comment | Observations |
|-----------|--------------------------|------------------------|------------------------|-------------------|--------------|--------------|
| 25        | 40.0                     | 40.0                   | 4710                   | -                 |              | Lower Marker |
| 1497      | 21.6                     | -                      | 42.4                   | 26.10             |              | 18S          |
| 4065      | 61.2                     | -                      | 44.2                   | 73.90             |              | 28S          |

**C1: R3 20XDilution**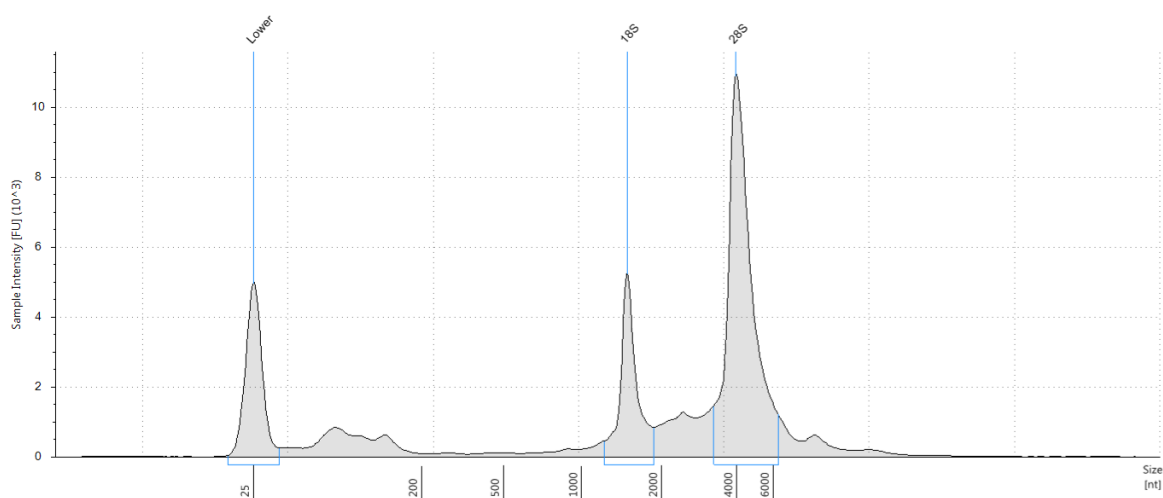**Sample Table**

| Well | RINe | 28S/18S (Area) | Conc. [ng/ $\mu$ l] | Sample Description | Alert | Observations |
|------|------|----------------|---------------------|--------------------|-------|--------------|
| C1   | 10.0 | 3.1            | 129                 | R3 20XDilution     |       |              |

**Peak Table**

| Size [nt] | Calibrated Conc. [ng/ $\mu$ l] | Assigned Conc. [ng/ $\mu$ l] | Peak Molarity [nmol/l] | % Integrated Area | Peak Comment | Observations |
|-----------|--------------------------------|------------------------------|------------------------|-------------------|--------------|--------------|
| 25        | 40.0                           | 40.0                         | 4710                   | -                 |              | Lower Marker |
| 1479      | 20.7                           | -                            | 41.2                   | 24.10             |              | 18S          |
| 3954      | 65.3                           | -                            | 48.5                   | 75.90             |              | 28S          |

**D1: S1 28XDilution**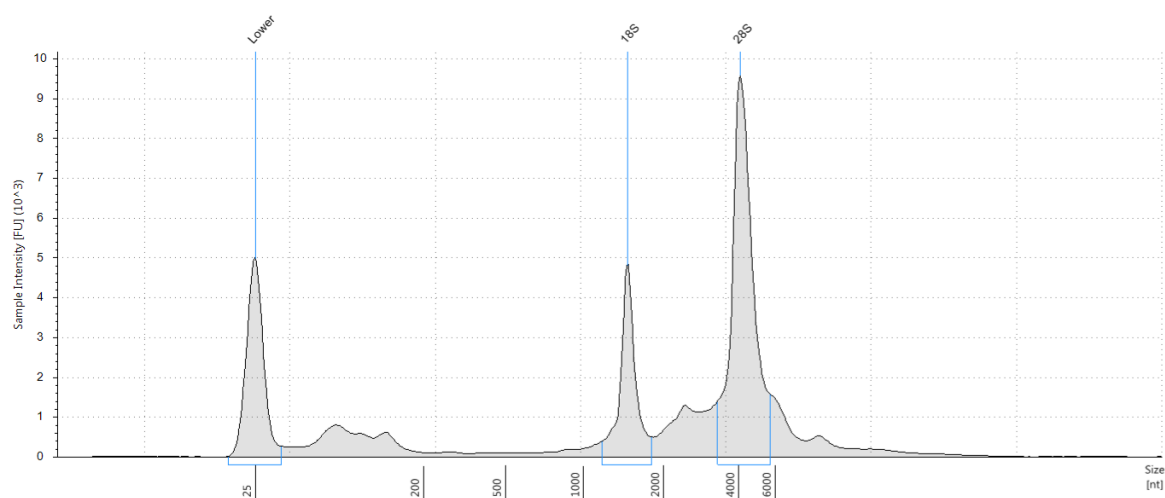**Sample Table**

| Well | RINe | 28S/18S (Area) | Conc. [ng/ $\mu$ l] | Sample Description | Alert | Observations |
|------|------|----------------|---------------------|--------------------|-------|--------------|
| D1   | 10.0 | 2.8            | 112                 | SI 28XDilution     |       |              |

**Peak Table**

| Size [nt] | Calibrated Conc. [ng/ $\mu$ l] | Assigned Conc. [ng/ $\mu$ l] | Peak Molarity [nmol/l] | % Integrated Area | Peak Comment | Observations |
|-----------|--------------------------------|------------------------------|------------------------|-------------------|--------------|--------------|
| 25        | 40.0                           | 40.0                         | 4710                   | -                 |              | Lower Marker |
| 1462      | 17.6                           | -                            | 35.4                   | 26.28             |              | 18S          |
| 4062      | 49.3                           | -                            | 35.7                   | 73.72             |              | 28S          |

**E1: S2 17XDilution**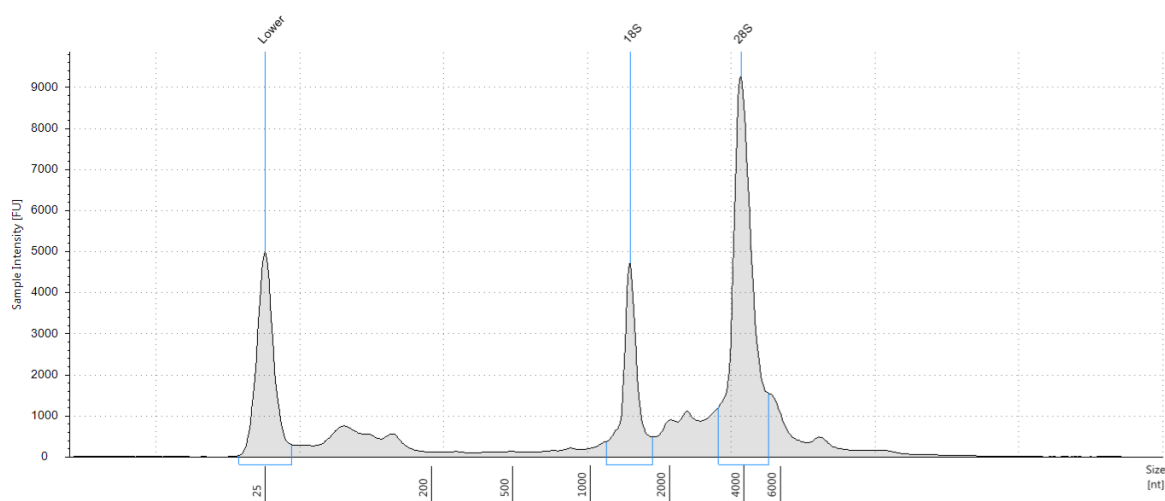**Sample Table**

| Well | RINe | 28S/18S (Area) | Conc. [ng/ $\mu$ l] | Sample Description | Alert | Observations |
|------|------|----------------|---------------------|--------------------|-------|--------------|
| E1   | 10.0 | 2.8            | 103                 | S2 17XDilution     |       |              |

**Peak Table**

| Size [nt] | Calibrated Conc. [ng/ $\mu$ l] | Assigned Conc. [ng/ $\mu$ l] | Peak Molarity [nmol/l] | % Integrated Area | Peak Comment | Observations |
|-----------|--------------------------------|------------------------------|------------------------|-------------------|--------------|--------------|
| 25        | 40.0                           | 40.0                         | 4710                   | -                 |              | Lower Marker |
| 1420      | 15.9                           | -                            | 33.0                   | 25.98             |              | 18S          |
| 3890      | 45.4                           | -                            | 34.3                   | 74.02             |              | 28S          |

**F1: S3 21XDilution**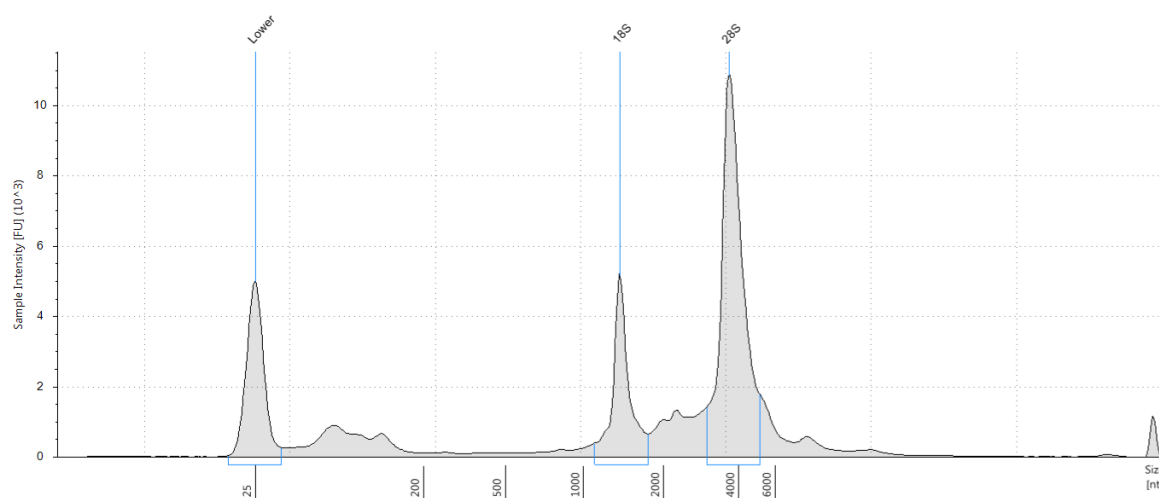**Sample Table**

| Well | RINe | 28S/18S (Area) | Conc. [ng/μl] | Sample Description | Alert | Observations |
|------|------|----------------|---------------|--------------------|-------|--------------|
| F1   | 10.0 | 2.9            | 120           | S3 21XDilution     |       |              |

**Peak Table**

| Size [nt] | Calibrated Conc. [ng/μl] | Assigned Conc. [ng/μl] | Peak Molarity [nmol/l] | % Integrated Area | Peak Comment | Observations |
|-----------|--------------------------|------------------------|------------------------|-------------------|--------------|--------------|
| 25        | 40.0                     | 40.0                   | 4710                   | -                 |              | Lower Marker |
| 1367      | 19.1                     | -                      | 41.1                   | 25.51             |              | 18S          |
| 3657      | 55.8                     | -                      | 44.9                   | 74.49             |              | 28S          |



**G1: CON-1 21XDilution**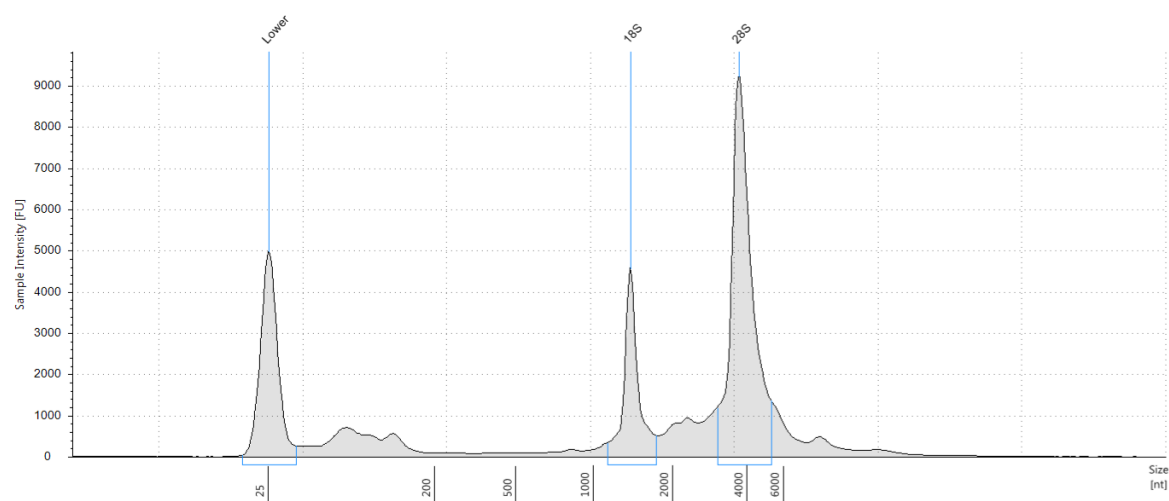**Sample Table**

| Well | RINe | 28S/18S (Area) | Conc. [ng/μl] | Sample Description | Alert | Observations |
|------|------|----------------|---------------|--------------------|-------|--------------|
| G1   | 10.0 | 3.0            | 97.4          | CON-1 21XDilution  |       |              |

**Peak Table**

| Size [nt] | Calibrated Conc. [ng/μl] | Assigned Conc. [ng/μl] | Peak Molarity [nmol/l] | % Integrated Area | Peak Comment | Observations |
|-----------|--------------------------|------------------------|------------------------|-------------------|--------------|--------------|
| 25        | 40.0                     | 40.0                   | 4710                   | -                 |              | Lower Marker |
| 1375      | 15.3                     | -                      | 32.7                   | 24.91             |              | 18S          |
| 3695      | 46.1                     | -                      | 36.7                   | 75.09             |              | 28S          |

**H1: CON-2 22XDilution**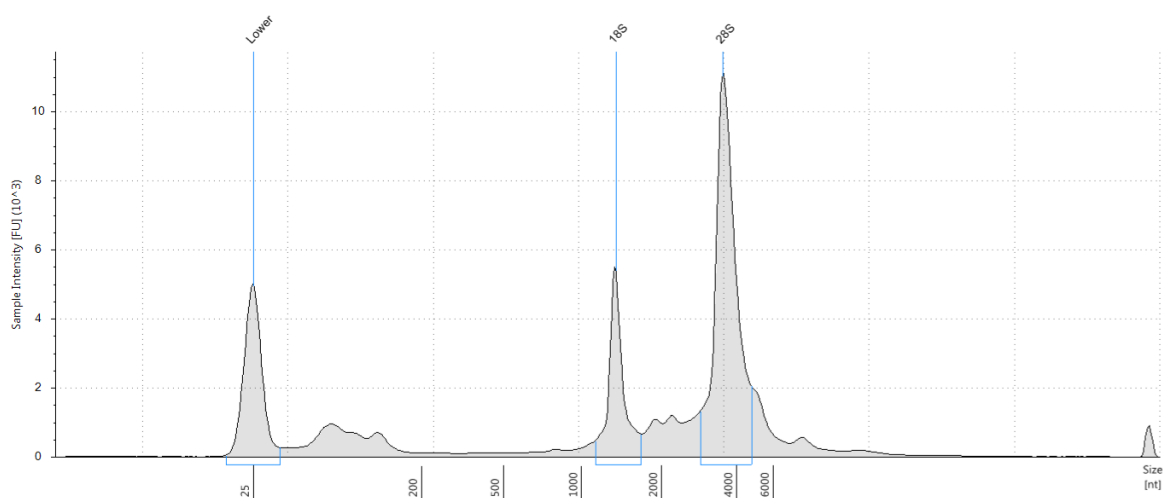**Sample Table**

| Well | RINe | 28S/18S (Area) | Conc. [ng/ $\mu$ l] | Sample Description | Alert | Observations |
|------|------|----------------|---------------------|--------------------|-------|--------------|
| H1   | 10.0 | 3.0            | 116                 | CON-2 22XDilution  |       |              |

**Peak Table**

| Size [nt] | Calibrated Conc. [ng/ $\mu$ l] | Assigned Conc. [ng/ $\mu$ l] | Peak Molarity [nmol/l] | % Integrated Area | Peak Comment | Observations |
|-----------|--------------------------------|------------------------------|------------------------|-------------------|--------------|--------------|
| 25        | 40.0                           | 40.0                         | 4710                   | -                 |              | Lower Marker |
| 1341      | 17.8                           | -                            | 39.0                   | 25.06             |              | 18S          |
| 3509      | 53.1                           | -                            | 44.5                   | 74.94             |              | 28S          |

**A2: CON-3 11XDilution**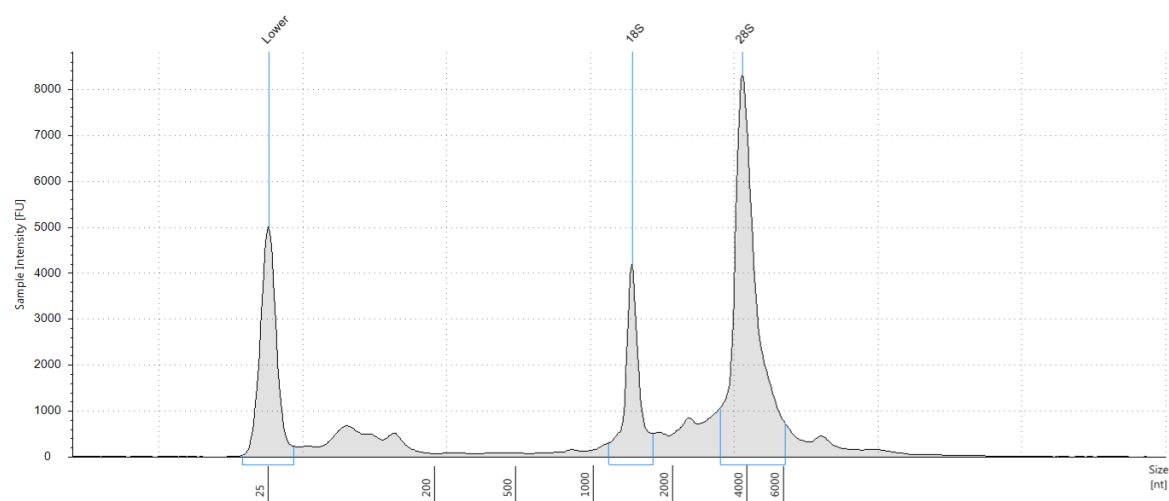**Sample Table**

| Well | RINe | 28S/18S (Area) | Conc. [ng/ $\mu$ l] | Sample Description | Alert | Observations |
|------|------|----------------|---------------------|--------------------|-------|--------------|
| A2   | 10.0 | 3.4            | 94.3                | CON-3 11XDilution  |       |              |

**Peak Table**

| Size [nt] | Calibrated Conc. [ng/ $\mu$ l] | Assigned Conc. [ng/ $\mu$ l] | Peak Molarity [nmol/l] | % Integrated Area | Peak Comment | Observations |
|-----------|--------------------------------|------------------------------|------------------------|-------------------|--------------|--------------|
| 25        | 40.0                           | 40.0                         | 4710                   | -                 |              | Lower Marker |
| 1402      | 14.1                           | -                            | 29.6                   | 22.90             |              | 18S          |
| 3825      | 47.5                           | -                            | 36.5                   | 77.10             |              | 28S          |
