# Supplementary material for: Transcriptome Analysis of the Inhibitory Effects of 20(S)-Protopanaxadiol on NCI-H1299 Non-Small Cell Lung Cancer Cells
Source: MDPI journal article supplement (doi:10.3390/molecules28155746), 2023-07-29
Supplement: s1 [file s1]

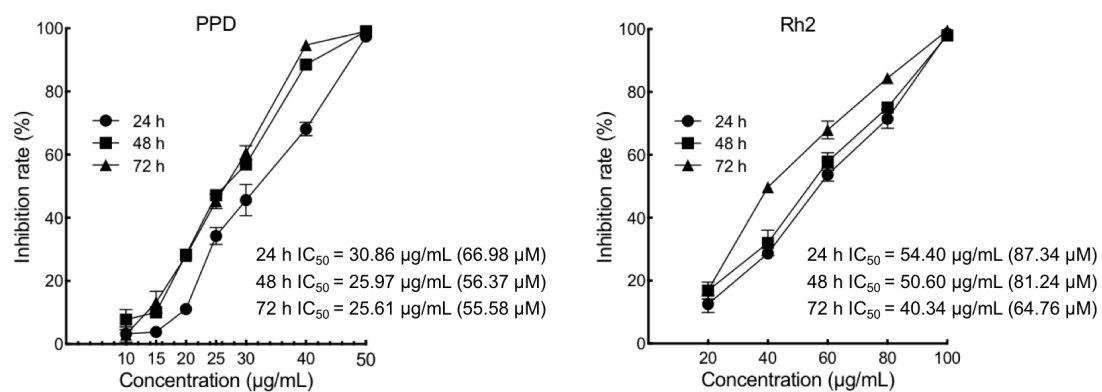

Figure S2. Dose-effects of PPD and ginsenoside Rh2 on NCI-H1299 cells. Cell viability was detected through CCK-8 assay after cells were treated with PPD (10, 15, 20, 25, 30, 40 and 50  $\mu$ g/mL) and Rh2 (20, 40, 60, 80 and 100  $\mu$ g/mL) for 24, 48 and 72 h.
