# Supplementary material for: Transcriptome Analysis of the Inhibitory Effects of 20(S)-Protopanaxadiol on NCI-H1299 Non-Small Cell Lung Cancer Cells
Source: MDPI journal article supplement (doi:10.3390/molecules28155746), 2023-07-29
Supplement: s1 [file s1]

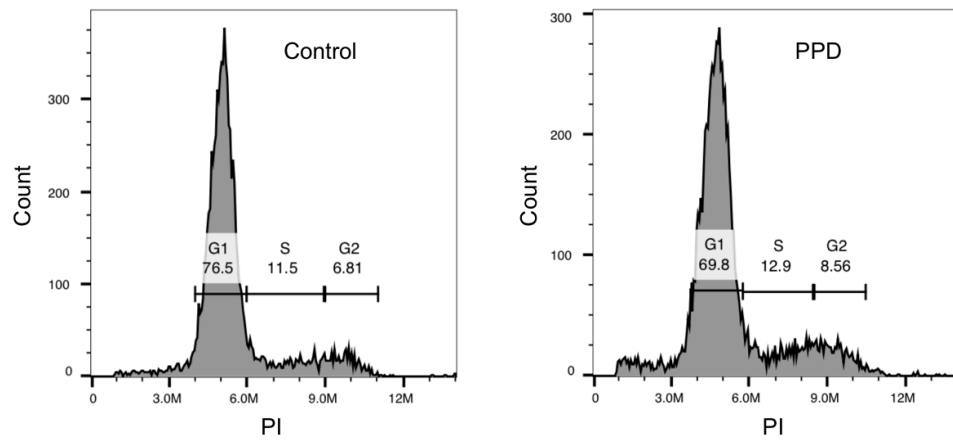

Figure S3. Effects of PPD on cell cycle of NCI-H1299 cells. Cell cycle was investigated through flow cytometry after PPD (26  $\mu\text{g}/\text{mL}$ ) treatment for 48 h.
