# Supplementary material for: Transcriptome Analysis of the Inhibitory Effects of 20(S)-Protopanaxadiol on NCI-H1299 Non-Small Cell Lung Cancer Cells
Source: MDPI journal article supplement (doi:10.3390/molecules28155746), 2023-07-29
Supplement: s1 [file Table S2 Genes expression changes of PPD vs Control.xlsx]

## Sheet: SvsC
gene_id	GeneSymbol	logFC	logCPM	F	PValue	FDR
ENSG00000101255	TRIB3	2.61006	7.17264	1598.77	0	0
ENSG00000113739	STC2	2.94543	7.8728	2175.23	0	0
ENSG00000116761	CTH	3.09869	5.79018	1542.59	0	0
ENSG00000124882	EREG	4.0642	4.92708	1656.86	0	0
ENSG00000130513	GDF15	4.1851	5.26336	1909.06	0	0
ENSG00000136244	IL6	2.78144	7.01391	1645.64	0	0
ENSG00000139289	PHLDA1	3.31528	6.33741	1983.21	0	0
ENSG00000151012	SLC7A11	2.58466	7.89046	1743.31	0	0
ENSG00000169429	IL8	3.66621	5.21616	1531.66	0	0
ENSG00000120738	EGR1	3.43483	5.27628	1372.8	6.64e-300	3.2e-296
ENSG00000087074	PPP1R15A	2.54544	6.54611	1290.87	3.62e-282	1.61e-278
ENSG00000137331	IER3	2.13005	8.14921	1267.8	3.57e-277	1.47e-273
ENSG00000175197	DDIT3	3.21396	5.2625	1243.8	5.6e-272	2.16e-268
ENSG00000120129	DUSP1	2.06873	7.66444	1118.38	8.23e-245	2.98e-241
ENSG00000070669	ASNS	2.18592	6.78062	1092.55	3.24e-239	1.1e-235
ENSG00000204389	HSPA1A	-2.05386	7.16523	972.457	3.44e-213	1.11e-209
ENSG00000130766	SESN2	2.18883	6.19595	959.627	2.08e-210	6.34e-207
ENSG00000198380	GFPT1	1.82231	7.71785	905.094	1.38e-198	4e-195
ENSG00000134294	SLC38A2	1.50094	10.7318	895.171	1.96e-196	5.4e-193
ENSG00000159167	STC1	1.9603	6.59995	879.421	5.1e-193	1.34e-189
ENSG00000141682	PMAIP1	2.2191	5.75504	873.81	8.39e-192	2.11e-188
ENSG00000052802	MSMO1	-2.06084	6.36852	867.582	1.88e-190	4.54e-187
ENSG00000166173	LARP6	2.24744	5.49938	858.932	1.41e-188	3.27e-185
ENSG00000107731	UNC5B	2.18407	5.61664	857.075	3.57e-188	7.96e-185
ENSG00000112972	HMGCS1	-1.95202	6.71331	839.815	1.98e-184	4.24e-181
ENSG00000197405	C5AR1	2.21022	5.50409	829.404	3.58e-182	7.41e-179
ENSG00000166123	GPT2	1.95749	6.14526	786.405	7.61e-173	1.52e-169
ENSG00000244405	ETV5	1.91006	6.27364	782.867	4.45e-172	8.6e-169
ENSG00000146733	PSPH	1.87851	6.39809	771.644	1.21e-169	2.26e-166
ENSG00000176046	NUPR1	1.95203	6.12043	767.652	8.9e-169	1.61e-165
ENSG00000128165	ADM2	3.43485	3.82531	756.544	2.29e-166	4.02e-163
ENSG00000204388	HSPA1B	-1.88812	6.59361	740.467	7.04e-163	1.2e-159
ENSG00000051108	HERPUD1	1.72324	7.23662	738.892	1.55e-162	2.56e-159
ENSG00000196517	SLC6A9	1.7875	6.43309	714.38	3.22e-157	5.19e-154
ENSG00000186480	INSIG1	-1.73065	6.96351	709.994	2.89e-156	4.52e-153
ENSG00000135069	PSAT1	1.50407	8.50463	696.943	1.96e-153	2.99e-150
ENSG00000100889	PCK2	1.87918	5.79454	670.817	9.18e-148	1.36e-144
ENSG00000185022	MAFF	2.83427	4.29519	649.381	4.13e-143	5.98e-140
ENSG00000109971	HSPA8	-1.24563	11.0031	642.632	1.2e-141	1.7e-138
ENSG00000116584	ARHGEF2	1.57969	7.07777	636.648	2.4e-140	3.31e-137
ENSG00000148841	ITPRIP	1.68952	6.49704	630.051	6.49e-139	8.73e-136
ENSG00000116717	GADD45A	1.86949	5.70758	615.194	1.09e-135	1.43e-132
ENSG00000143384	MCL1	1.29568	9.92808	614.995	1.2e-135	1.55e-132
ENSG00000104549	SQLE	-1.87366	5.57393	606.197	9.79e-134	1.23e-130
ENSG00000145860	RNF145	1.56025	6.96829	604.584	2.19e-133	2.7e-130
ENSG00000162772	ATF3	2.0958	5.37823	602.791	5.38e-133	6.48e-130
ENSG00000175592	FOSL1	1.89554	5.39745	590.397	2.64e-130	3.12e-127
ENSG00000059804	SLC2A3	1.61318	6.41419	578.713	9.1e-128	1.05e-124
ENSG00000081041	CXCL2	2.36809	4.58928	571.028	4.24e-126	4.82e-123
ENSG00000065911	MTHFD2	1.33318	8.68683	564.341	1.2e-124	1.34e-121
ENSG00000067064	IDI1	-1.54587	6.62741	550.344	1.32e-121	1.44e-118
ENSG00000100219	XBP1	1.44379	7.36403	549.138	2.41e-121	2.58e-118
ENSG00000153879	CEBPG	1.65974	5.90222	545.691	1.35e-120	1.42e-117
ENSG00000101384	JAG1	1.59982	6.06497	534.968	2.88e-118	2.98e-115
ENSG00000110619	CARS	1.42642	7.07627	518.747	9.63e-115	9.78e-112
ENSG00000106105	GARS	1.25727	8.91831	517.683	1.64e-114	1.64e-111
ENSG00000120875	DUSP4	1.42752	7.0895	515.943	3.91e-114	3.84e-111
ENSG00000139269	INHBE	4.33241	2.64335	515.422	5.08e-114	4.9e-111
ENSG00000172216	CEBPB	1.5151	6.35729	503.204	2.29e-111	2.18e-108
ENSG00000146592	CREB5	1.56002	5.94126	492.674	4.45e-109	4.15e-106
ENSG00000143013	LMO4	1.68857	5.3995	486.221	1.12e-107	1.03e-104
ENSG00000162733	DDR2	1.24633	8.26407	471.444	1.83e-104	1.65e-101
ENSG00000008710	PKD1	1.38274	6.69167	463.478	9.83e-103	8.75e-100
ENSG00000181852	RNF41	1.46436	6.12322	457.817	1.67e-101	1.46e-98
ENSG00000164284	GRPEL2	1.39911	6.5734	456.53	3.18e-101	2.75e-98
ENSG00000168209	DDIT4	1.18309	8.84625	456.493	3.24e-101	2.76e-98
ENSG00000108509	CAMTA2	1.53424	5.75348	454.668	8.08e-101	6.78e-98
ENSG00000142627	EPHA2	1.27846	7.57512	454.408	9.19e-101	7.56e-98
ENSG00000128342	LIF	1.89537	4.76931	454.393	9.26e-101	7.56e-98
ENSG00000134070	IRAK2	1.62343	5.4969	453.938	1.16e-100	9.36e-98
ENSG00000074935	TUBE1	1.48777	5.8658	439.1	1.95e-97	1.55e-94
ENSG00000172432	GTPBP2	1.37136	6.49806	436.291	7.97e-97	6.23e-94
ENSG00000170345	FOS	1.7595	5.08244	434.603	1.85e-96	1.43e-93
ENSG00000171132	PRKCE	1.7787	4.86876	432.255	6.01e-96	4.58e-93
ENSG00000261824	LINC00662	1.82574	4.72758	429.803	2.05e-95	1.54e-92
ENSG00000106070	GRB10	1.48488	5.72116	426.951	8.54e-95	6.34e-92
ENSG00000135842	FAM129A	1.79296	4.75941	424.95	2.33e-94	1.71e-91
ENSG00000116852	KIF21B	2.83516	3.16201	419.264	4.01e-93	2.9e-90
ENSG00000115902	SLC1A4	1.53995	5.45967	419.18	4.18e-93	2.99e-90
ENSG00000153234	NR4A2	2.01734	4.379	417.966	7.67e-93	5.42e-90
ENSG00000136826	KLF4	1.35675	6.34595	411.371	2.08e-91	1.45e-88
ENSG00000140044	JDP2	1.58988	5.18873	403.598	1.02e-89	7.04e-87
ENSG00000139514	SLC7A1	1.17993	7.86252	403.134	1.29e-89	8.77e-87
ENSG00000087266	SH3BP2	1.38548	6.058	402.647	1.64e-89	1.11e-86
ENSG00000127533	F2RL3	1.59272	5.11893	396.46	3.64e-88	2.42e-85
ENSG00000111252	SH2B3	1.36175	6.07134	393.615	1.51e-87	9.95e-85
ENSG00000160179	ABCG1	4.97401	1.94983	382.121	4.78e-85	3.11e-82
ENSG00000124145	SDC4	1.23599	6.89802	381.741	5.78e-85	3.72e-82
ENSG00000044574	HSPA5	0.948855	10.8758	372.548	5.77e-83	3.67e-80
ENSG00000106546	AHR	1.28088	6.34558	370.205	1.86e-82	1.17e-79
ENSG00000138835	RGS3	1.72186	4.61802	369.547	2.59e-82	1.61e-79
ENSG00000079459	FDFT1	-1.18228	7.25253	369.15	3.16e-82	1.95e-79
ENSG00000168297	PXK	1.49335	5.21952	365.989	1.54e-81	9.39e-79
ENSG00000088826	SMOX	1.31335	5.94789	354.73	4.33e-79	2.61e-76
ENSG00000166750	SLFN5	1.1867	6.81958	350.96	2.86e-78	1.71e-75
ENSG00000065060	UHRF1BP1	1.16029	7.09698	350.839	3.04e-78	1.8e-75
ENSG00000090861	AARS	1.08703	7.95807	346.938	2.15e-77	1.26e-74
ENSG00000164951	PDP1	1.36759	5.59721	343.732	1.07e-76	6.19e-74
ENSG00000153714	LURAP1L	1.73732	4.46275	341.313	3.59e-76	2.06e-73
ENSG00000129474	AJUBA	1.23516	6.22135	340.017	6.88e-76	3.91e-73
ENSG00000110921	MVK	-2.0504	3.95241	337.952	1.94e-75	1.09e-72
ENSG00000128272	ATF4	0.997233	9.13408	337.327	2.65e-75	1.47e-72
ENSG00000198517	MAFK	1.61245	4.74262	331.113	5.96e-74	3.28e-71
ENSG00000006459	KDM7A	1.47367	5.02207	328.712	1.98e-73	1.08e-70
ENSG00000119986	AVPI1	1.14888	6.85975	327.591	3.48e-73	1.88e-70
ENSG00000197063	MAFG	1.24663	6.12117	326.265	6.76e-73	3.62e-70
ENSG00000169908	TM4SF1	1.00468	8.66898	323.286	3.01e-72	1.6e-69
ENSG00000130066	SAT1	1.21676	6.12299	316.918	7.31e-71	3.85e-68
ENSG00000138166	DUSP5	2.70326	3.00177	314.621	2.31e-70	1.21e-67
ENSG00000112715	VEGFA	1.06145	7.36504	305.374	2.38e-68	1.23e-65
ENSG00000105281	SLC1A5	0.994819	8.30315	305.336	2.42e-68	1.24e-65
ENSG00000235636	NUS1P1	1.83933	3.92168	303.526	6.01e-68	3.05e-65
ENSG00000149289	ZC3H12C	1.48522	4.88426	303.111	7.39e-68	3.72e-65
ENSG00000148154	UGCG	1.3161	5.4221	303.081	7.51e-68	3.75e-65
ENSG00000092621	PHGDH	1.0268	7.72825	301.679	1.52e-67	7.5e-65
ENSG00000031698	SARS	1.02604	7.68881	300.035	3.45e-67	1.7e-64
ENSG00000174951	FUT1	3.79611	2.08681	296.643	1.89e-66	9.2e-64
ENSG00000248323	LUCAT1	2.26642	3.2471	296.57	1.96e-66	9.47e-64
ENSG00000123689	G0S2	1.93435	3.79111	294.148	6.61e-66	3.16e-63
ENSG00000155304	HSPA13	1.07122	6.93827	292.976	1.19e-65	5.64e-63
ENSG00000175906	ARL4D	1.68512	4.14949	289.864	5.66e-65	2.66e-62
ENSG00000095752	IL11	2.42662	2.96483	289.149	8.1e-65	3.78e-62
ENSG00000143322	ABL2	0.996128	7.80939	283.615	1.3e-63	6.01e-61
ENSG00000166986	MARS	0.964697	8.14394	281.322	4.1e-63	1.88e-60
ENSG00000075643	MOCOS	1.18814	5.74761	281.063	4.66e-63	2.13e-60
ENSG00000123358	NR4A1	1.4629	4.7907	279.054	1.28e-62	5.78e-60
ENSG00000152409	JMY	1.19979	5.6613	278.415	1.76e-62	7.9e-60
ENSG00000196954	CASP4	1.03494	6.95656	276.356	4.94e-62	2.2e-59
ENSG00000164463	CREBRF	1.94974	3.76533	275.872	6.3e-62	2.78e-59
ENSG00000253981	ALG1L13P	1.95156	3.5855	274.126	1.51e-61	6.63e-59
ENSG00000136868	SLC31A1	1.09941	6.27934	272.898	2.8e-61	1.22e-58
ENSG00000144824	PHLDB2	0.9437	8.20128	272.396	3.6e-61	1.55e-58
ENSG00000163661	PTX3	3.04122	2.36871	272.141	4.09e-61	1.75e-58
ENSG00000160888	IER2	1.10515	6.27806	271.986	4.42e-61	1.88e-58
ENSG00000141582	CBX4	1.10366	6.19425	268.913	2.06e-60	8.72e-58
ENSG00000128872	TMOD2	1.92355	3.51711	268.473	2.57e-60	1.08e-57
ENSG00000104635	SLC39A14	0.98213	7.47946	267.143	5.01e-60	2.09e-57
ENSG00000197971	MBP	1.27309	5.202	266.15	8.25e-60	3.41e-57
ENSG00000114796	KLHL24	1.3693	4.89431	261.551	8.28e-59	3.4e-56
ENSG00000106948	AKNA	1.54408	4.23832	260.411	1.47e-58	5.98e-56
ENSG00000109654	TRIM2	1.02735	6.65674	259.345	2.5e-58	1.01e-55
ENSG00000196182	STK40	1.21884	5.36403	256.388	1.1e-57	4.43e-55
ENSG00000074527	NTN4	1.07521	6.19997	256.012	1.33e-57	5.32e-55
ENSG00000111371	SLC38A1	0.810021	10.2271	253.849	3.94e-57	1.56e-54
ENSG00000170921	TANC2	1.05519	6.27704	253.33	5.11e-57	2.01e-54
ENSG00000113742	CPEB4	1.22502	5.33516	252.987	6.07e-57	2.38e-54
ENSG00000105835	NAMPT	0.963063	7.29662	251.242	1.46e-56	5.66e-54
ENSG00000159216	RUNX1	1.0811	6.08726	250.796	1.82e-56	7.03e-54
ENSG00000183696	UPP1	1.12135	5.82639	245.199	3.02e-55	1.16e-52
ENSG00000167103	PIP5KL1	2.12298	3.05423	244.818	3.66e-55	1.39e-52
ENSG00000174738	NR1D2	1.24772	5.13053	243.592	6.76e-55	2.56e-52
ENSG00000147872	PLIN2	0.942335	7.27459	237.711	1.29e-53	4.86e-51
ENSG00000196352	CD55	0.811446	9.59017	237.188	1.68e-53	6.25e-51
ENSG00000244462	RBM12	-0.993465	6.69218	237.185	1.68e-53	6.25e-51
ENSG00000167522	ANKRD11	0.867516	8.40854	236.069	2.95e-53	1.09e-50
ENSG00000147383	NSDHL	-1.18824	5.32411	234.588	6.2e-53	2.27e-50
ENSG00000176597	B3GNT5	1.08072	5.77545	234.401	6.81e-53	2.48e-50
ENSG00000177606	JUN	1.15497	5.6749	232.052	2.21e-52	8e-50
ENSG00000166900	STX3	1.11055	5.71407	230.913	3.92e-52	1.41e-49
ENSG00000124762	CDKN1A	0.97388	6.63445	228.063	1.64e-51	5.85e-49
ENSG00000115963	RND3	1.06987	5.78144	227.804	1.87e-51	6.63e-49
ENSG00000130517	PGPEP1	1.51863	4.09675	227.766	1.9e-51	6.71e-49
ENSG00000165030	NFIL3	1.13336	5.42397	226.922	2.9e-51	1.02e-48
ENSG00000137936	BCAR3	0.914119	7.25381	225.663	5.46e-51	1.9e-48
ENSG00000132510	KDM6B	1.49456	4.22077	225.532	5.83e-51	2.02e-48
ENSG00000147852	VLDLR	1.61104	3.84998	225.219	6.82e-51	2.35e-48
ENSG00000102554	KLF5	0.88838	7.48985	221.331	4.8e-50	1.65e-47
ENSG00000185262	UBALD2	1.1312	5.32928	220.765	6.38e-50	2.17e-47
ENSG00000173812	EIF1	0.81224	8.93281	220.03	9.23e-50	3.12e-47
ENSG00000177169	ULK1	0.961604	6.46824	217.957	2.61e-49	8.79e-47
ENSG00000164442	CITED2	0.998161	6.13759	217.458	3.36e-49	1.12e-46
ENSG00000174807	CD248	-1.15099	5.20224	216.621	5.11e-49	1.69e-46
ENSG00000166289	PLEKHF1	1.58537	3.93607	216.617	5.12e-49	1.69e-46
ENSG00000167962	ZNF598	0.930088	6.72881	215.35	9.67e-49	3.18e-46
ENSG00000213699	SLC35F6	1.00443	6.04448	214.638	1.38e-48	4.52e-46
ENSG00000160285	LSS	-0.939985	6.62628	213.484	2.47e-48	8.02e-46
ENSG00000132196	HSD17B7	-1.49357	4.20091	213.158	2.9e-48	9.4e-46
ENSG00000109929	SC5D	-1.15426	5.17979	213.082	3.02e-48	9.71e-46
ENSG00000181634	TNFSF15	2.58133	2.18934	212.529	3.98e-48	1.27e-45
ENSG00000134086	VHL	0.858299	7.69928	211.478	6.75e-48	2.15e-45
ENSG00000137124	ALDH1B1	-1.08882	5.46353	211.088	8.22e-48	2.6e-45
ENSG00000173575	CHD2	0.855717	7.71988	210.674	1.01e-47	3.18e-45
ENSG00000182095	TNRC18	0.884188	7.19676	210.095	1.35e-47	4.23e-45
ENSG00000139211	AMIGO2	0.880702	7.22939	210.025	1.4e-47	4.36e-45
ENSG00000164171	ITGA2	0.9568	6.18973	208.085	3.71e-47	1.15e-44
ENSG00000134684	YARS	0.821182	8.2495	207.627	4.67e-47	1.44e-44
ENSG00000189057	FAM111B	-0.934939	6.56215	207.18	5.84e-47	1.79e-44
ENSG00000166532	RIMKLB	0.868785	7.3183	206.087	1.01e-46	3.08e-44
ENSG00000136010	ALDH1L2	0.884045	7.04881	204.926	1.81e-46	5.49e-44
ENSG00000116044	NFE2L2	0.861734	7.34759	203.378	3.94e-46	1.19e-43
ENSG00000019144	PHLDB1	-0.962788	6.1864	202.511	6.09e-46	1.83e-43
ENSG00000147162	OGT	0.780805	8.84704	202.24	6.98e-46	2.08e-43
ENSG00000182319	SGK223	1.40581	4.13669	201.59	9.68e-46	2.87e-43
ENSG00000146242	TPBG	0.849355	7.46253	201.555	9.85e-46	2.91e-43
ENSG00000172893	DHCR7	-0.919638	6.4898	199.298	3.06e-45	8.99e-43
ENSG00000113448	PDE4D	0.852494	7.34919	198.994	3.56e-45	1.04e-42
ENSG00000130147	SH3BP4	1.02962	5.54849	198.332	4.97e-45	1.45e-42
ENSG00000105327	BBC3	1.92786	3.0158	198.132	5.49e-45	1.59e-42
ENSG00000206560	ANKRD28	0.819218	7.84723	196.549	1.22e-44	3.51e-42
ENSG00000168003	SLC3A2	0.744891	9.4256	196.19	1.46e-44	4.18e-42
ENSG00000147689	FAM83A	0.904738	6.47559	196.017	1.59e-44	4.53e-42
ENSG00000144655	CSRNP1	1.36235	4.41236	195.982	1.62e-44	4.59e-42
ENSG00000113161	HMGCR	-0.851047	7.27472	194.841	2.87e-44	8.1e-42
ENSG00000182585	EPGN	0.94493	6.06016	194.042	4.29e-44	1.2e-41
ENSG00000189060	H1F0	0.948562	6.14038	193.931	4.53e-44	1.27e-41
ENSG00000173846	PLK3	1.43586	4.0617	193.763	4.93e-44	1.37e-41
ENSG00000168264	IRF2BP2	0.880304	6.77913	193.372	6e-44	1.66e-41
ENSG00000105939	ZC3HAV1	-0.855948	7.21199	193.255	6.36e-44	1.75e-41
ENSG00000134107	BHLHE40	0.790372	8.41375	193.079	6.95e-44	1.91e-41
ENSG00000102287	GABRE	-0.850181	7.18491	192.743	8.23e-44	2.25e-41
ENSG00000130487	KLHDC7B	4.9404	0.882848	191.5	1.54e-43	4.18e-41
ENSG00000167508	MVD	-1.25527	4.6454	191.28	1.72e-43	4.64e-41
ENSG00000141622	RNF165	1.18625	4.67057	189.806	3.6e-43	9.69e-41
ENSG00000144136	SLC20A1	0.882845	6.62638	189.768	3.67e-43	9.83e-41
ENSG00000133639	BTG1	0.912546	6.28323	188.908	5.65e-43	1.51e-40
ENSG00000134830	C5AR2	1.04568	5.35834	188.665	6.38e-43	1.7e-40
ENSG00000176624	MEX3C	1.02953	5.38779	188.651	6.43e-43	1.7e-40
ENSG00000109321	AREG	3.52094	1.43434	188.237	7.91e-43	2.08e-40
ENSG00000120889	TNFRSF10B	0.866403	6.77567	188.185	8.12e-43	2.13e-40
ENSG00000175793	SFN	-0.851916	7.02057	188.053	8.68e-43	2.26e-40
ENSG00000160200	CBS	0.867611	6.73164	187.523	1.13e-42	2.94e-40
ENSG00000140105	WARS	0.790377	7.98926	186.684	1.73e-42	4.46e-40
ENSG00000075420	FNDC3B	0.798406	7.82808	186.673	1.74e-42	4.47e-40
ENSG00000006652	IFRD1	0.816862	7.50955	186.414	1.98e-42	5.07e-40
ENSG00000177311	ZBTB38	0.792832	7.91819	186.375	2.02e-42	5.14e-40
ENSG00000184185	KCNJ12	1.17364	4.74712	186.002	2.43e-42	6.18e-40
ENSG00000184792	OSBP2	0.847109	6.93738	185.741	2.77e-42	7.01e-40
ENSG00000184557	SOCS3	1.12762	5.0618	185.601	2.98e-42	7.49e-40
ENSG00000250033	SLC7A11-AS1	3.16376	1.7122	184.462	5.27e-42	1.32e-39
ENSG00000198732	SMOC1	0.853761	6.78683	184.231	5.92e-42	1.48e-39
ENSG00000167767	KRT80	0.804235	7.58114	183.793	7.38e-42	1.83e-39
ENSG00000070404	FSTL3	-0.799202	7.74498	183.444	8.79e-42	2.18e-39
ENSG00000102531	FNDC3A	0.861845	6.68384	182.763	1.24e-41	3.05e-39
ENSG00000105550	FGF21	6.44143	0.635404	181.17	2.76e-41	6.76e-39
ENSG00000198369	SPRED2	1.0026	5.41319	181.056	2.92e-41	7.13e-39
ENSG00000141458	NPC1	0.851298	6.75869	180.801	3.32e-41	8.07e-39
ENSG00000184009	ACTG1	-0.648052	11.1313	180.692	3.51e-41	8.49e-39
ENSG00000213923	CSNK1E	0.871392	6.48856	180.588	3.69e-41	8.91e-39
ENSG00000109787	KLF3	0.910871	6.05767	179.916	5.18e-41	1.24e-38
ENSG00000103257	SLC7A5	0.638055	11.3006	178.664	9.71e-41	2.32e-38
ENSG00000177426	TGIF1	0.915578	6.02198	178.258	1.19e-40	2.84e-38
ENSG00000116016	EPAS1	0.766495	8.1068	178.08	1.3e-40	3.09e-38
ENSG00000154319	FAM167A	1.11181	4.77767	177.166	2.06e-40	4.87e-38
ENSG00000187678	SPRY4	2.74132	1.86725	177.036	2.2e-40	5.18e-38
ENSG00000157514	TSC22D3	0.934	5.79774	176.838	2.43e-40	5.7e-38
ENSG00000250251	PKD1P6	1.33427	4.04191	176.817	2.46e-40	5.74e-38
ENSG00000115641	FHL2	0.86505	6.42535	175.11	5.79e-40	1.35e-37
ENSG00000158246	FAM46B	-1.72983	3.49716	173.893	1.07e-39	2.47e-37
ENSG00000146648	EGFR	0.750267	8.17672	173.165	1.54e-39	3.55e-37
ENSG00000163393	SLC22A15	1.34358	4.01635	173.147	1.55e-39	3.57e-37
ENSG00000008513	ST3GAL1	1.17465	4.51456	172.529	2.12e-39	4.85e-37
ENSG00000066135	KDM4A	0.863833	6.31758	171.752	3.13e-39	7.14e-37
ENSG00000181788	SIAH2	0.944558	5.60782	171.313	3.91e-39	8.87e-37
ENSG00000166833	NAV2	0.804127	7.06661	171.18	4.18e-39	9.44e-37
ENSG00000167723	TRPV3	2.57345	2.49089	170.272	6.59e-39	1.49e-36
ENSG00000128283	CDC42EP1	0.842382	6.4785	169.845	8.17e-39	1.83e-36
ENSG00000146278	PNRC1	0.847689	6.48991	169.367	1.04e-38	2.32e-36
ENSG00000075624	ACTB	-0.602368	11.7893	168.526	1.59e-38	3.53e-36
ENSG00000139793	MBNL2	0.789149	7.23955	168.405	1.68e-38	3.74e-36
ENSG00000111912	NCOA7	0.768986	7.5961	168.226	1.84e-38	4.07e-36
ENSG00000059728	MXD1	1.04473	5.03823	168.154	1.91e-38	4.21e-36
ENSG00000134686	PHC2	0.83731	6.5145	168.028	2.04e-38	4.47e-36
ENSG00000075426	FOSL2	0.813769	6.90212	167.976	2.09e-38	4.57e-36
ENSG00000171617	ENC1	1.7405	2.9565	166.098	5.37e-38	1.17e-35
ENSG00000102804	TSC22D1	0.737365	8.10912	165.583	6.96e-38	1.51e-35
ENSG00000145632	PLK2	-0.932941	5.5565	165.477	7.34e-38	1.59e-35
ENSG00000139668	WDFY2	0.971407	5.30303	165.328	7.91e-38	1.7e-35
ENSG00000137876	RSL24D1	0.777364	7.29331	164.559	1.16e-37	2.5e-35
ENSG00000212719	C17orf51	0.966803	5.32399	163.069	2.46e-37	5.27e-35
ENSG00000118523	CTGF	1.08386	4.74679	162.358	3.52e-37	7.5e-35
ENSG00000167747	C19orf48	0.864799	6.08276	162.01	4.2e-37	8.9e-35
ENSG00000113407	TARS	0.656051	9.91855	161.478	5.48e-37	1.16e-34
ENSG00000109084	TMEM97	-0.817773	6.59634	160.836	7.57e-37	1.59e-34
ENSG00000138685	FGF2	0.806835	6.60936	160.135	1.08e-36	2.26e-34
ENSG00000185950	IRS2	0.930454	5.5685	159.79	1.28e-36	2.68e-34
ENSG00000178234	GALNT11	-0.929379	5.58986	158.842	2.06e-36	4.3e-34
ENSG00000183955	SETD8	0.781813	6.94082	158.352	2.64e-36	5.48e-34
ENSG00000187840	EIF4EBP1	0.831632	6.30307	158.163	2.9e-36	6e-34
ENSG00000003989	SLC7A2	0.743335	7.50775	156.256	7.57e-36	1.56e-33
ENSG00000114019	AMOTL2	0.802251	6.60496	155.968	8.76e-36	1.8e-33
ENSG00000157693	C9orf91	0.989847	5.10531	155.505	1.11e-35	2.26e-33
ENSG00000171223	JUNB	0.764862	7.10447	154.589	1.75e-35	3.57e-33
ENSG00000119801	YPEL5	1.27954	3.9417	154.324	2e-35	4.07e-33
ENSG00000153071	DAB2	0.836231	6.07851	154.135	2.2e-35	4.46e-33
ENSG00000211459	MT-RNR1	0.593044	11.2594	153.908	2.47e-35	4.98e-33
ENSG00000176142	TMEM39A	0.86657	5.84607	153.311	3.33e-35	6.7e-33
ENSG00000196935	SRGAP1	0.890706	5.56294	152.663	4.62e-35	9.25e-33
ENSG00000079156	OSBPL6	1.06888	4.65019	152.362	5.37e-35	1.07e-32
ENSG00000178607	ERN1	1.62287	3.15231	152.317	5.49e-35	1.09e-32
ENSG00000023171	GRAMD1B	0.712606	7.99985	152.187	5.87e-35	1.16e-32
ENSG00000171867	PRNP	0.772307	6.83003	151.219	9.54e-35	1.89e-32
ENSG00000163814	CDCP1	0.78691	6.51694	150.113	1.67e-34	3.28e-32
ENSG00000124813	RUNX2	0.885496	5.54863	149.908	1.85e-34	3.62e-32
ENSG00000112773	FAM46A	-0.725008	7.62625	149.759	1.99e-34	3.89e-32
ENSG00000145623	OSMR	0.687119	8.42569	149.683	2.07e-34	4.03e-32
ENSG00000262001	DLGAP1-AS2	1.17532	4.28577	149.62	2.13e-34	4.15e-32
ENSG00000112081	SRSF3	-0.684384	8.47228	147.872	5.14e-34	9.96e-32
ENSG00000088986	DYNLL1	-0.761164	6.92833	147.053	7.76e-34	1.5e-31
ENSG00000150961	SEC24D	0.793356	6.43897	146.488	1.03e-33	1.98e-31
ENSG00000167110	GOLGA2	0.725826	7.46627	146.424	1.07e-33	2.04e-31
ENSG00000188215	DCUN1D3	1.21695	4.04768	145.097	2.08e-33	3.97e-31
ENSG00000029993	HMGB3	-0.762848	6.77773	144.988	2.19e-33	4.18e-31
ENSG00000112245	PTP4A1	0.593371	10.7132	144.69	2.55e-33	4.84e-31
ENSG00000105856	HBP1	0.875341	5.56307	144.646	2.61e-33	4.93e-31
ENSG00000139725	RHOF	1.05189	4.64164	144.377	2.98e-33	5.63e-31
ENSG00000184575	XPOT	0.652153	8.97788	143.629	4.35e-33	8.17e-31
ENSG00000125977	EIF2S2	0.679248	8.28185	143.328	5.06e-33	9.48e-31
ENSG00000069869	NEDD4	0.69575	7.86783	143.306	5.12e-33	9.55e-31
ENSG00000166886	NAB2	1.02319	4.74849	142.453	7.86e-33	1.46e-30
ENSG00000176845	METRNL	0.754254	6.80328	142.376	8.17e-33	1.52e-30
ENSG00000033030	ZCCHC8	0.79183	6.29289	142.229	8.8e-33	1.63e-30
ENSG00000138660	AP1AR	0.872082	5.48613	140.851	1.76e-32	3.25e-30
ENSG00000171451	DSEL	-0.83228	5.82288	140.461	2.14e-32	3.94e-30
ENSG00000197622	CDC42SE1	0.725783	7.04307	138.672	5.27e-32	9.66e-30
ENSG00000160111	CPAMD8	1.72265	2.77868	138.263	6.47e-32	1.18e-29
ENSG00000104140	RHOV	-0.950757	5.00317	137.865	7.91e-32	1.44e-29
ENSG00000146083	RNF44	0.91065	5.14989	137.065	1.18e-31	2.15e-29
ENSG00000174705	SH3PXD2B	0.770019	6.33064	136.764	1.38e-31	2.49e-29
ENSG00000137193	PIM1	1.03046	4.68937	136.421	1.64e-31	2.95e-29
ENSG00000138061	CYP1B1	0.640736	8.83264	136.4	1.65e-31	2.97e-29
ENSG00000068137	PLEKHH3	0.967852	4.82871	136.131	1.89e-31	3.39e-29
ENSG00000091490	SEL1L3	0.799695	5.95706	135.45	2.67e-31	4.77e-29
ENSG00000185650	ZFP36L1	0.734142	6.74651	134.604	4.08e-31	7.28e-29
ENSG00000112837	TBX18	-0.79002	6.02679	134.352	4.64e-31	8.23e-29
ENSG00000114315	HES1	1.62391	3.10683	132.825	1e-30	1.77e-28
ENSG00000171552	BCL2L1	0.738631	6.52837	132.652	1.09e-30	1.93e-28
ENSG00000059758	CDK17	0.78457	6.01099	132.307	1.3e-30	2.28e-28
ENSG00000027869	SH2D2A	0.956719	4.7993	132.077	1.46e-30	2.56e-28
ENSG00000204103	MAFB	-1.56197	3.12383	131.447	2e-30	3.5e-28
ENSG00000125347	IRF1	1.04536	4.61682	131.362	2.09e-30	3.64e-28
ENSG00000117461	PIK3R3	0.745813	6.37833	130.441	3.32e-30	5.78e-28
ENSG00000104356	POP1	-0.773979	6.129	130.044	4.06e-30	7.04e-28
ENSG00000139112	GABARAPL1	0.847833	5.4278	129.064	6.65e-30	1.15e-27
ENSG00000167772	ANGPTL4	0.921689	4.91008	128.91	7.18e-30	1.24e-27
ENSG00000166224	SGPL1	0.769172	6.05083	128.667	8.12e-30	1.39e-27
ENSG00000006327	TNFRSF12A	0.666305	7.74078	128.41	9.24e-30	1.58e-27
ENSG00000115183	TANC1	0.728247	6.53771	128.157	1.05e-29	1.79e-27
ENSG00000198796	ALPK2	0.839102	5.3501	128.097	1.08e-29	1.84e-27
ENSG00000149218	ENDOD1	-1.06168	4.40415	128.042	1.11e-29	1.89e-27
ENSG00000087510	TFAP2C	0.790598	5.78411	127.835	1.23e-29	2.09e-27
ENSG00000013588	GPRC5A	0.648499	8.0571	127.437	1.51e-29	2.55e-27
ENSG00000228253	MT-ATP8	-0.652576	7.98572	127.43	1.51e-29	2.55e-27
ENSG00000146166	LGSN	1.2646	3.60032	126.702	2.18e-29	3.67e-27
ENSG00000148339	SLC25A25	0.89236	5.23425	126.612	2.29e-29	3.83e-27
ENSG00000196639	HRH1	0.768494	6.02719	126.543	2.37e-29	3.95e-27
ENSG00000145604	SKP2	-0.685772	7.2333	126.325	2.64e-29	4.4e-27
ENSG00000132170	PPARG	0.793225	5.73527	126.205	2.81e-29	4.65e-27
ENSG00000167470	MIDN	0.695493	6.99961	126.055	3.03e-29	5.01e-27
ENSG00000251192	ZNF674	1.40757	3.25483	125.762	3.51e-29	5.79e-27
ENSG00000121060	TRIM25	0.680648	7.20613	125.139	4.8e-29	7.9e-27
ENSG00000102786	INTS6	0.692532	6.95549	124.868	5.5e-29	9.03e-27
ENSG00000169155	ZBTB43	0.798082	5.8087	124.586	6.34e-29	1.04e-26
ENSG00000231196	RP11-495P10.8	3.88405	0.606428	124.507	6.6e-29	1.08e-26
ENSG00000133794	ARNTL	0.815429	5.47376	123.973	8.63e-29	1.4e-26
ENSG00000134986	NREP	-1.00763	4.47846	123.92	8.87e-29	1.44e-26
ENSG00000146477	SLC22A3	-1.03086	4.4456	123.626	1.03e-28	1.66e-26
ENSG00000166046	TCP11L2	2.10062	1.94729	123.52	1.09e-28	1.75e-26
ENSG00000153395	LPCAT1	0.658813	7.62161	123.363	1.17e-28	1.89e-26
ENSG00000167173	C15orf39	0.735608	6.30204	123.244	1.25e-28	2e-26
ENSG00000102908	NFAT5	0.679713	7.08571	122.997	1.41e-28	2.26e-26
ENSG00000117228	GBP1	-2.63311	1.39423	122.74	1.61e-28	2.56e-26
ENSG00000123066	MED13L	0.667908	7.30453	122.675	1.66e-28	2.64e-26
ENSG00000070961	ATP2B1	0.613217	8.62436	122.177	2.13e-28	3.39e-26
ENSG00000140941	MAP1LC3B	0.81053	5.48467	121.502	3e-28	4.74e-26
ENSG00000161011	SQSTM1	0.629569	8.23997	121.376	3.2e-28	5.04e-26
ENSG00000182199	SHMT2	0.620694	8.38048	121.218	3.46e-28	5.45e-26
ENSG00000245532	NEAT1	0.615799	8.59118	121.102	3.67e-28	5.76e-26
ENSG00000156030	ELMSAN1	0.775397	5.69863	121.056	3.75e-28	5.88e-26
ENSG00000196470	SIAH1	1.03344	4.33167	120.846	4.17e-28	6.51e-26
ENSG00000118689	FOXO3	0.775097	5.77869	120.525	4.91e-28	7.64e-26
ENSG00000140416	TPM1	-0.646889	7.66207	120.178	5.85e-28	9.07e-26
ENSG00000171056	SOX7	1.17112	3.74615	118.995	1.06e-27	1.64e-25
ENSG00000180447	GAS1	-0.788186	5.58321	118.905	1.11e-27	1.71e-25
ENSG00000174749	C4orf32	0.812723	5.38755	118.79	1.18e-27	1.81e-25
ENSG00000165175	MID1IP1	0.761952	5.84143	118.482	1.37e-27	2.11e-25
ENSG00000128692	EIF2S2P4	0.908636	4.83593	118.223	1.57e-27	2.4e-25
ENSG00000228626	RP11-495P10.9	3.34765	0.751509	118.187	1.59e-27	2.44e-25
ENSG00000147010	SH3KBP1	0.659374	7.20264	117.99	1.76e-27	2.68e-25
ENSG00000101104	PABPC1L	0.907096	4.81279	117.593	2.15e-27	3.27e-25
ENSG00000162298	SYVN1	0.712054	6.36687	117.486	2.27e-27	3.44e-25
ENSG00000229644	NAMPTL	0.97595	4.45419	117.376	2.4e-27	3.63e-25
ENSG00000198952	SMG5	0.665296	7.05768	116.997	2.9e-27	4.38e-25
ENSG00000139146	FAM60A	0.699643	6.47991	116.929	3.01e-27	4.52e-25
ENSG00000198431	TXNRD1	0.609436	8.35887	116.613	3.52e-27	5.29e-25
ENSG00000141198	TOM1L1	0.751424	5.80333	116.41	3.9e-27	5.84e-25
ENSG00000131389	SLC6A6	0.633327	7.7217	116.321	4.08e-27	6.09e-25
ENSG00000196998	WDR45	0.832871	5.17843	115.981	4.85e-27	7.21e-25
ENSG00000106665	CLIP2	0.875419	4.95875	115.703	5.57e-27	8.28e-25
ENSG00000118515	SGK1	0.600001	8.54728	115.601	5.87e-27	8.69e-25
ENSG00000112294	ALDH5A1	-0.78358	5.56969	115.372	6.59e-27	9.73e-25
ENSG00000175556	LONRF3	0.87712	4.91129	115.299	6.84e-27	1.01e-24
ENSG00000135269	TES	0.632813	7.64348	115.08	7.63e-27	1.12e-24
ENSG00000136205	TNS3	-0.732863	5.97082	115.013	7.89e-27	1.16e-24
ENSG00000117318	ID3	-0.634966	7.71803	114.983	8.02e-27	1.17e-24
ENSG00000174564	IL20RB	0.671132	6.79655	114.924	8.26e-27	1.2e-24
ENSG00000145990	GFOD1	0.856902	5.01026	114.885	8.42e-27	1.23e-24
ENSG00000171988	JMJD1C	0.671119	6.8293	114.759	8.97e-27	1.3e-24
ENSG00000125845	BMP2	0.85866	5.15083	114.703	9.23e-27	1.34e-24
ENSG00000226328	CTA-217C2.1	1.2396	3.624	114.593	9.76e-27	1.41e-24
ENSG00000115993	TRAK2	0.737285	5.89598	113.734	1.5e-26	2.17e-24
ENSG00000123080	CDKN2C	-0.71229	6.25485	113.719	1.52e-26	2.18e-24
ENSG00000049759	NEDD4L	0.86501	5.03482	113.558	1.64e-26	2.36e-24
ENSG00000132003	ZSWIM4	1.29608	3.33575	113.54	1.66e-26	2.37e-24
ENSG00000100625	SIX4	0.951224	4.52318	113.446	1.74e-26	2.48e-24
ENSG00000156273	BACH1	0.772739	5.59234	113.164	2.01e-26	2.85e-24
ENSG00000108176	DNAJC12	0.807091	5.31518	112.995	2.18e-26	3.1e-24
ENSG00000111859	NEDD9	0.732387	5.96555	112.983	2.2e-26	3.11e-24
ENSG00000170385	SLC30A1	0.639812	7.30809	112.419	2.92e-26	4.12e-24
ENSG00000128016	ZFP36	1.2622	3.56435	112.39	2.96e-26	4.17e-24
ENSG00000138678	AGPAT9	1.00387	4.2643	111.805	3.98e-26	5.59e-24
ENSG00000170677	SOCS6	0.707613	6.14418	111.734	4.12e-26	5.78e-24
ENSG00000101335	MYL9	-0.750457	5.71431	111.666	4.27e-26	5.97e-24
ENSG00000125089	SH3TC1	0.935271	4.56986	111.538	4.55e-26	6.35e-24
ENSG00000165390	ANXA8	-1.41339	3.01031	111.014	5.93e-26	8.25e-24
ENSG00000203883	SOX18	-1.52765	2.79726	109.911	1.03e-25	1.44e-23
ENSG00000132326	PER2	0.947084	4.45732	109.893	1.04e-25	1.45e-23
ENSG00000223749	MIR503HG	1.31621	3.19145	108.73	1.88e-25	2.59e-23
ENSG00000175309	PHYKPL	0.782885	5.33919	108.566	2.04e-25	2.81e-23
ENSG00000020577	SAMD4A	1.12032	3.73821	108.357	2.26e-25	3.11e-23
ENSG00000180801	ARSJ	0.86082	4.82401	107.922	2.82e-25	3.87e-23
ENSG00000136153	LMO7	0.608628	7.68348	107.53	3.44e-25	4.7e-23
ENSG00000023445	BIRC3	0.701147	6.00955	107.401	3.67e-25	5.01e-23
ENSG00000139428	MMAB	-0.947868	4.44614	106.684	5.26e-25	7.17e-23
ENSG00000115738	ID2	-0.973185	4.435	106.618	5.44e-25	7.4e-23
ENSG00000163734	CXCL3	2.14926	1.99635	106.077	7.15e-25	9.7e-23
ENSG00000129757	CDKN1C	-0.902656	4.65394	105.279	1.07e-24	1.45e-22
ENSG00000120437	ACAT2	-0.662539	6.5237	105.248	1.09e-24	1.47e-22
ENSG00000167550	RHEBL1	1.44725	2.85852	105.016	1.22e-24	1.64e-22
ENSG00000136436	CALCOCO2	0.719248	5.73861	104.946	1.27e-24	1.7e-22
ENSG00000198455	ZXDB	0.931021	4.45812	104.882	1.31e-24	1.75e-22
ENSG00000177410	ZFAS1	0.639598	6.92127	104.62	1.49e-24	1.99e-22
ENSG00000196230	TUBB	-0.495233	11.0244	104.612	1.5e-24	2e-22
ENSG00000109220	CHIC2	1.25766	3.30771	104.39	1.67e-24	2.23e-22
ENSG00000113163	COL4A3BP	0.72991	5.64654	104.158	1.88e-24	2.5e-22
ENSG00000115541	HSPE1	-0.613084	7.43214	104.044	1.99e-24	2.64e-22
ENSG00000126838	PZP	-0.886506	4.71796	103.799	2.26e-24	2.98e-22
ENSG00000183458	RP11-958N24.1	1.29016	3.21521	103.653	2.43e-24	3.2e-22
ENSG00000013441	CLK1	0.831833	4.99185	103.584	2.52e-24	3.31e-22
ENSG00000161547	SRSF2	-0.589624	7.94387	103.288	2.92e-24	3.84e-22
ENSG00000099194	SCD	-0.567467	8.51874	103.212	3.04e-24	3.98e-22
ENSG00000182831	C16orf72	0.681629	6.11241	102.097	5.33e-24	6.96e-22
ENSG00000119669	IRF2BPL	0.742856	5.43537	102.004	5.58e-24	7.28e-22
ENSG00000035403	VCL	-0.549713	8.95391	101.999	5.6e-24	7.28e-22
ENSG00000133935	C14orf1	-0.684043	6.09361	101.967	5.69e-24	7.38e-22
ENSG00000130340	SNX9	0.627821	6.90838	101.674	6.6e-24	8.54e-22
ENSG00000132846	ZBED3	0.67347	6.13918	101.217	8.31e-24	1.07e-21
ENSG00000006704	GTF2IRD1	0.654259	6.45732	101.008	9.23e-24	1.19e-21
ENSG00000112406	HECA	0.84307	4.78286	100.595	1.14e-23	1.46e-21
ENSG00000160014	CALM3	-0.651742	6.51215	100.565	1.15e-23	1.48e-21
ENSG00000077044	DGKD	0.624073	6.91058	100.391	1.26e-23	1.61e-21
ENSG00000188599	NPIPP1	2.20943	1.54933	100.336	1.3e-23	1.66e-21
ENSG00000107864	CPEB3	1.2515	3.25629	100.111	1.45e-23	1.85e-21
ENSG00000106078	COBL	0.626343	6.80148	100.011	1.53e-23	1.94e-21
ENSG00000147883	CDKN2B	0.715967	5.5697	99.6807	1.8e-23	2.29e-21
ENSG00000196878	LAMB3	0.595135	7.41204	99.188	2.31e-23	2.93e-21
ENSG00000198146	ZNF770	0.602965	7.22921	98.946	2.61e-23	3.3e-21
ENSG00000134531	EMP1	0.646662	6.35893	98.6505	3.03e-23	3.83e-21
ENSG00000108061	SHOC2	0.693089	5.76395	98.143	3.92e-23	4.93e-21
ENSG00000166398	KIAA0355	0.987685	4.07813	98.0657	4.08e-23	5.12e-21
ENSG00000010810	FYN	0.715368	5.51283	97.7903	4.68e-23	5.87e-21
ENSG00000168488	ATXN2L	0.575605	7.82532	97.4182	5.65e-23	7.07e-21
ENSG00000148737	TCF7L2	0.780419	5.06199	97.3492	5.85e-23	7.3e-21
ENSG00000135334	AKIRIN2	0.687593	5.84075	97.1704	6.41e-23	7.98e-21
ENSG00000163870	TPRA1	0.691924	5.89477	97.0712	6.73e-23	8.37e-21
ENSG00000196083	IL1RAP	0.750358	5.24033	96.9874	7.03e-23	8.71e-21
ENSG00000125740	FOSB	2.34908	1.88975	96.7215	8.03e-23	9.94e-21
ENSG00000164741	DLC1	1.5426	2.50322	96.6278	8.42e-23	1.04e-20
ENSG00000124788	ATXN1	0.694168	5.64022	96.026	1.14e-22	1.41e-20
ENSG00000132688	NES	-0.999896	4.00838	95.7108	1.34e-22	1.65e-20
ENSG00000156639	ZFAND3	0.815328	4.81469	95.6626	1.37e-22	1.68e-20
ENSG00000095383	TBC1D2	0.799384	4.92305	95.5139	1.48e-22	1.81e-20
ENSG00000163993	S100P	0.796762	4.8887	95.2872	1.66e-22	2.03e-20
ENSG00000126368	NR1D1	1.1708	3.38008	95.1417	1.78e-22	2.17e-20
ENSG00000158470	B4GALT5	0.620564	6.64723	95.003	1.91e-22	2.33e-20
ENSG00000188735	TMEM120B	0.859571	4.5515	94.8983	2.02e-22	2.45e-20
ENSG00000005238	FAM214B	1.02085	3.84379	94.7554	2.17e-22	2.63e-20
ENSG00000153885	KCTD15	0.754119	5.1168	94.5832	2.37e-22	2.86e-20
ENSG00000065809	FAM107B	0.582258	7.37569	94.4718	2.5e-22	3.02e-20
ENSG00000188158	NHS	0.626154	6.49217	94.2367	2.82e-22	3.39e-20
ENSG00000197191	C9orf169	1.17387	3.28431	94.1417	2.96e-22	3.55e-20
ENSG00000102241	HTATSF1	-0.580723	7.45299	93.9203	3.31e-22	3.96e-20
ENSG00000077150	NFKB2	0.754404	5.18054	93.8659	3.4e-22	4.07e-20
ENSG00000196159	FAT4	-0.811613	4.81617	93.6383	3.81e-22	4.55e-20
ENSG00000107290	SETX	0.571708	7.58786	93.1294	4.93e-22	5.87e-20
ENSG00000080546	SESN1	-0.821983	4.79431	92.9701	5.34e-22	6.35e-20
ENSG00000175832	ETV4	0.95354	3.97634	92.4512	6.94e-22	8.24e-20
ENSG00000116604	MEF2D	0.627165	6.39383	92.4183	7.06e-22	8.36e-20
ENSG00000171522	PTGER4	-1.20282	3.32434	92.3782	7.2e-22	8.51e-20
ENSG00000166987	MBD6	0.690365	5.6251	92.3374	7.35e-22	8.67e-20
ENSG00000174804	FZD4	0.932262	4.10876	92.1844	7.95e-22	9.35e-20
ENSG00000079308	TNS1	-0.699238	5.50779	92.119	8.21e-22	9.65e-20
ENSG00000239306	RBM14	-0.621195	6.56577	91.9566	8.91e-22	1.04e-19
ENSG00000119487	MAPKAP1	-0.608889	6.7438	91.946	8.96e-22	1.05e-19
ENSG00000064666	CNN2	-0.565782	7.56006	90.8798	1.54e-21	1.79e-19
ENSG00000097007	ABL1	0.562409	7.61092	90.7954	1.6e-21	1.87e-19
ENSG00000107262	BAG1	-0.544957	8.14277	90.5434	1.82e-21	2.12e-19
ENSG00000067082	KLF6	0.574617	7.41501	90.5167	1.85e-21	2.14e-19
ENSG00000058673	ZC3H11A	0.551315	7.86898	90.0608	2.32e-21	2.69e-19
ENSG00000143614	GATAD2B	0.592744	6.8336	89.7564	2.71e-21	3.13e-19
ENSG00000198142	SOWAHC	0.666401	5.6983	89.6838	2.81e-21	3.24e-19
ENSG00000159556	ISL2	1.22235	3.20579	89.5772	2.97e-21	3.41e-19
ENSG00000104231	ZFAND1	0.657067	5.82972	89.5176	3.06e-21	3.51e-19
ENSG00000260916	CCPG1	0.63413	6.10525	88.869	4.24e-21	4.87e-19
ENSG00000198815	FOXJ3	0.598337	6.65454	88.6803	4.67e-21	5.34e-19
ENSG00000100784	RPS6KA5	1.04763	3.68133	88.5876	4.89e-21	5.59e-19
ENSG00000186871	ERCC6L	-0.667844	5.75468	88.5831	4.9e-21	5.59e-19
ENSG00000135919	SERPINE2	0.52887	8.3855	88.5627	4.95e-21	5.64e-19
ENSG00000183671	GPR1	1.17649	3.18765	88.4937	5.13e-21	5.82e-19
ENSG00000101187	SLCO4A1	0.669138	5.61495	88.2827	5.71e-21	6.47e-19
ENSG00000173237	C11orf86	0.742419	5.08909	88.0035	6.57e-21	7.43e-19
ENSG00000122861	PLAU	0.599419	6.55159	87.8391	7.14e-21	8.06e-19
ENSG00000112297	AIM1	-0.743835	5.02581	87.7081	7.63e-21	8.6e-19
ENSG00000184545	DUSP8	1.15445	3.45638	87.461	8.64e-21	9.72e-19
ENSG00000167996	FTH1	0.447452	11.217	87.3724	9.04e-21	1.01e-18
ENSG00000074410	CA12	-0.774651	4.89506	87.3069	9.34e-21	1.05e-18
ENSG00000210082	MT-RNR2	0.37902	14.0426	87.2763	9.49e-21	1.06e-18
ENSG00000119900	OGFRL1	0.558741	7.39118	87.2348	9.69e-21	1.08e-18
ENSG00000196950	SLC39A10	-0.621048	6.21393	87.1146	1.03e-20	1.15e-18
ENSG00000168137	SETD5	0.515963	8.66683	86.9445	1.12e-20	1.25e-18
ENSG00000163435	ELF3	-1.19395	3.48202	86.8357	1.19e-20	1.32e-18
ENSG00000198496	NBR2	1.1604	3.23504	86.7131	1.26e-20	1.4e-18
ENSG00000110092	CCND1	0.605826	6.33826	86.3421	1.52e-20	1.68e-18
ENSG00000179918	SEPHS2	0.627424	6.08677	86.3369	1.53e-20	1.68e-18
ENSG00000135241	PNPLA8	0.709123	5.27445	86.2257	1.61e-20	1.78e-18
ENSG00000164327	RICTOR	0.553754	7.45208	86.1045	1.72e-20	1.89e-18
ENSG00000131473	ACLY	-0.499745	9.12874	86.066	1.75e-20	1.92e-18
ENSG00000147274	RBMX	-0.51421	8.63013	85.8547	1.95e-20	2.13e-18
ENSG00000270172	RP5-1024G6.8	-0.786991	4.77729	85.7086	2.1e-20	2.29e-18
ENSG00000173276	ZBTB21	0.678235	5.54724	85.494	2.34e-20	2.55e-18
ENSG00000138134	STAMBPL1	0.64415	5.76521	85.3365	2.53e-20	2.75e-18
ENSG00000138496	PARP9	-1.17132	3.18753	85.3013	2.58e-20	2.8e-18
ENSG00000168994	PXDC1	0.645502	5.86706	84.9979	3e-20	3.26e-18
ENSG00000113615	SEC24A	0.587556	6.66759	84.818	3.29e-20	3.56e-18
ENSG00000133398	MED10	0.628842	5.97031	84.639	3.6e-20	3.89e-18
ENSG00000105612	DNASE2	0.666637	5.54173	84.5918	3.69e-20	3.98e-18
ENSG00000165494	PCF11	-0.61049	6.29266	84.564	3.74e-20	4.02e-18
ENSG00000036257	CUL3	-0.578749	6.78724	84.4121	4.04e-20	4.34e-18
ENSG00000143256	PFDN2	0.598884	6.41754	84.3602	4.15e-20	4.45e-18
ENSG00000084112	SSH1	0.645929	5.6996	83.874	5.3e-20	5.67e-18
ENSG00000112343	TRIM38	0.710279	5.16467	83.7866	5.54e-20	5.92e-18
ENSG00000136451	VEZF1	0.594425	6.42713	83.6953	5.8e-20	6.19e-18
ENSG00000141867	BRD4	0.588475	6.5167	83.5894	6.12e-20	6.52e-18
ENSG00000197860	SGTB	0.699934	5.19768	83.5513	6.24e-20	6.63e-18
ENSG00000073756	PTGS2	2.17698	1.38435	83.446	6.58e-20	6.98e-18
ENSG00000163874	ZC3H12A	0.881477	4.17191	83.1074	7.81e-20	8.27e-18
ENSG00000140534	TICRR	-0.565519	7.00481	83.0688	7.97e-20	8.42e-18
ENSG00000204644	ZFP57	0.738428	4.92539	83.0649	7.98e-20	8.42e-18
ENSG00000162236	STX5	0.661142	5.55559	82.944	8.48e-20	8.93e-18
ENSG00000115875	SRSF7	-0.53441	7.80356	82.931	8.54e-20	8.97e-18
ENSG00000205213	LGR4	-0.692349	5.22656	82.415	1.11e-19	1.16e-17
ENSG00000110400	PVRL1	-0.942255	3.96144	82.1881	1.24e-19	1.3e-17
ENSG00000174343	CHRNA9	0.569913	6.72882	82.1773	1.25e-19	1.31e-17
ENSG00000187514	PTMA	-0.459434	10.1926	81.9531	1.4e-19	1.46e-17
ENSG00000068078	FGFR3	-1.07098	3.5137	81.6816	1.61e-19	1.67e-17
ENSG00000185686	PRAME	-0.893338	4.15965	81.5622	1.71e-19	1.77e-17
ENSG00000165802	NSMF	-0.627635	5.88625	81.404	1.85e-19	1.92e-17
ENSG00000103126	AXIN1	0.60798	6.02776	80.9096	2.37e-19	2.46e-17
ENSG00000134215	VAV3	-0.64035	5.63097	80.8902	2.4e-19	2.48e-17
ENSG00000185432	METTL7A	-0.694649	5.15533	80.8452	2.45e-19	2.53e-17
ENSG00000165997	ARL5B	0.598781	6.20625	80.8135	2.49e-19	2.57e-17
ENSG00000101928	MOSPD1	0.649739	5.6053	80.7317	2.6e-19	2.67e-17
ENSG00000227184	EPPK1	-0.582495	6.40467	80.6209	2.75e-19	2.82e-17
ENSG00000114784	EIF1B	0.665132	5.42173	80.5841	2.8e-19	2.87e-17
ENSG00000159479	MED8	0.629187	5.77743	80.4638	2.97e-19	3.04e-17
ENSG00000075213	SEMA3A	0.77333	4.55519	80.1996	3.4e-19	3.47e-17
ENSG00000221963	APOL6	0.778289	4.58421	79.1705	5.72e-19	5.84e-17
ENSG00000143878	RHOB	0.522523	7.76277	79.0113	6.2e-19	6.31e-17
ENSG00000158615	PPP1R15B	0.519237	7.77758	78.6745	7.36e-19	7.47e-17
ENSG00000198585	NUDT16	-0.689681	5.21279	78.3313	8.75e-19	8.88e-17
ENSG00000162616	DNAJB4	-0.583338	6.44814	78.2522	9.11e-19	9.22e-17
ENSG00000166106	ADAMTS15	-1.0378	3.45951	77.8295	1.13e-18	1.14e-16
ENSG00000164976	KIAA1161	-1.0016	3.63193	77.7772	1.16e-18	1.17e-16
ENSG00000185567	AHNAK2	-0.51792	7.74481	77.67	1.22e-18	1.23e-16
ENSG00000198712	MT-CO2	-0.383785	12.8338	77.6046	1.26e-18	1.27e-16
ENSG00000162512	SDC3	-0.710736	4.95539	77.2809	1.49e-18	1.49e-16
ENSG00000123908	AGO2	0.607373	5.8317	76.9947	1.72e-18	1.72e-16
ENSG00000133466	C1QTNF6	-0.647345	5.49805	76.9509	1.76e-18	1.76e-16
ENSG00000122257	RBBP6	-0.535253	7.19605	76.9393	1.77e-18	1.77e-16
ENSG00000204498	NFKBIL1	0.666381	5.26939	76.8491	1.85e-18	1.85e-16
ENSG00000121690	DEPDC7	-0.687742	5.1409	76.7661	1.93e-18	1.92e-16
ENSG00000130707	ASS1	0.493258	8.32535	76.4472	2.27e-18	2.26e-16
ENSG00000133101	CCNA1	1.79715	1.58271	76.4337	2.29e-18	2.27e-16
ENSG00000166401	SERPINB8	0.724098	4.78132	75.7822	3.18e-18	3.15e-16
ENSG00000242265	PEG10	-0.453443	9.69744	75.6346	3.43e-18	3.39e-16
ENSG00000171604	CXXC5	-0.6708	5.24757	75.5343	3.61e-18	3.56e-16
ENSG00000113384	GOLPH3	0.488927	8.3482	75.248	4.17e-18	4.11e-16
ENSG00000149798	CDC42EP2	0.856978	4.08895	75.2439	4.18e-18	4.11e-16
ENSG00000123268	ATF1	0.523939	7.24854	75.1252	4.44e-18	4.35e-16
ENSG00000165046	LETM2	1.10181	3.10589	75.0225	4.67e-18	4.58e-16
ENSG00000140299	BNIP2	0.540619	6.85151	74.9649	4.81e-18	4.71e-16
ENSG00000105810	CDK6	0.563056	6.39291	74.9451	4.86e-18	4.75e-16
ENSG00000162852	CNST	0.548183	6.70354	74.8992	4.97e-18	4.85e-16
ENSG00000112658	SRF	-0.589557	6.01375	74.7307	5.42e-18	5.27e-16
ENSG00000134109	EDEM1	0.523001	7.29875	74.5624	5.9e-18	5.73e-16
ENSG00000119537	KDSR	0.58541	6.03203	74.492	6.11e-18	5.93e-16
ENSG00000140853	NLRC5	-0.561173	6.44208	74.4639	6.2e-18	6e-16
ENSG00000140743	CDR2	0.609482	5.75493	74.4096	6.37e-18	6.16e-16
ENSG00000124782	RREB1	0.596138	5.89956	74.3006	6.74e-18	6.5e-16
ENSG00000167566	NCKAP5L	0.650974	5.25648	73.9459	8.06e-18	7.77e-16
ENSG00000125731	SH2D3A	0.769033	4.44877	73.9209	8.16e-18	7.85e-16
ENSG00000086061	DNAJA1	-0.48095	8.5112	73.9052	8.23e-18	7.9e-16
ENSG00000186193	SAPCD2	-0.628849	5.52654	73.827	8.56e-18	8.21e-16
ENSG00000213412	HNRNPA1P33	-0.715306	4.79987	73.3984	1.06e-17	1.02e-15
ENSG00000117394	SLC2A1	0.516956	7.32047	73.3556	1.09e-17	1.04e-15
ENSG00000171246	NPTX1	-0.748596	4.64398	73.3174	1.11e-17	1.06e-15
ENSG00000171208	NETO2	-0.536611	6.86024	73.2069	1.17e-17	1.12e-15
ENSG00000107338	SHB	1.15195	2.91945	72.1699	1.98e-17	1.88e-15
ENSG00000119915	ELOVL3	-2.05656	1.39208	71.9762	2.19e-17	2.08e-15
ENSG00000151458	ANKRD50	0.56481	6.11806	71.6054	2.64e-17	2.5e-15
ENSG00000164402	2023-09-08	-0.6768	5.0257	71.3998	2.93e-17	2.77e-15
ENSG00000189308	LIN54	0.61299	5.54158	71.3138	3.06e-17	2.89e-15
ENSG00000106780	MEGF9	-0.866651	3.99196	71.1936	3.25e-17	3.07e-15
ENSG00000154767	XPC	0.545419	6.46393	71.1314	3.35e-17	3.16e-15
ENSG00000134278	SPIRE1	0.609458	5.53603	71.0717	3.46e-17	3.25e-15
ENSG00000188910	GJB3	0.823878	4.01203	70.6423	4.3e-17	4.03e-15
ENSG00000204390	HSPA1L	-1.39589	2.42887	70.4287	4.79e-17	4.49e-15
ENSG00000188229	TUBB4B	-0.444907	9.36439	69.9777	6.02e-17	5.63e-15
ENSG00000128590	DNAJB9	0.858286	4.15401	69.8635	6.38e-17	5.96e-15
ENSG00000185090	MANEAL	-0.863726	3.98088	69.5867	7.34e-17	6.84e-15
ENSG00000157870	FAM213B	-0.888975	3.80432	69.5629	7.43e-17	6.92e-15
ENSG00000138138	ATAD1	0.500084	7.40068	69.5464	7.49e-17	6.96e-15
ENSG00000171566	PLRG1	0.52693	6.68416	69.3703	8.19e-17	7.6e-15
ENSG00000183426	NPIPA1	0.91057	3.70092	69.3637	8.22e-17	7.61e-15
ENSG00000206538	VGLL3	-0.535012	6.49539	69.1377	9.21e-17	8.52e-15
ENSG00000145390	USP53	0.615018	5.40705	69.0602	9.58e-17	8.85e-15
ENSG00000149547	EI24	-0.488221	7.72693	68.9975	9.89e-17	9.12e-15
ENSG00000136997	MYC	0.46244	8.55759	68.9544	1.01e-16	9.31e-15
ENSG00000172059	KLF11	0.637592	5.24559	68.8369	1.07e-16	9.87e-15
ENSG00000198561	CTNND1	-0.488473	7.67356	68.7678	1.11e-16	1.02e-14
ENSG00000118503	TNFAIP3	0.975455	4.03152	68.6445	1.18e-16	1.08e-14
ENSG00000137699	TRIM29	-0.487037	7.70346	68.6365	1.19e-16	1.09e-14
ENSG00000244754	N4BP2L2	0.552352	6.19372	68.5424	1.25e-16	1.14e-14
ENSG00000123395	C12orf44	0.606496	5.47572	68.492	1.28e-16	1.17e-14
ENSG00000183010	PYCR1	0.514565	6.90118	68.3627	1.36e-16	1.24e-14
ENSG00000204520	MICA	-0.577917	5.86761	68.3575	1.37e-16	1.24e-14
ENSG00000138594	TMOD3	0.46975	8.18165	68.2883	1.42e-16	1.29e-14
ENSG00000139263	LRIG3	0.749668	4.40963	68.2396	1.45e-16	1.32e-14
ENSG00000172071	EIF2AK3	0.650501	5.1721	68.1755	1.5e-16	1.36e-14
ENSG00000196696	PDXDC2P	1.03615	3.28072	68.1061	1.55e-16	1.4e-14
ENSG00000139318	DUSP6	2.24188	0.852116	68.0197	1.62e-16	1.46e-14
ENSG00000171940	ZNF217	0.547297	6.26308	68.0221	1.62e-16	1.46e-14
ENSG00000112584	FAM120B	-0.620081	5.40311	67.9469	1.69e-16	1.52e-14
ENSG00000125746	EML2	0.70362	4.71822	67.8797	1.74e-16	1.57e-14
ENSG00000163053	SLC16A14	-0.815171	4.1219	67.689	1.92e-16	1.72e-14
ENSG00000204054	LINC00963	0.569317	5.86536	67.6442	1.96e-16	1.76e-14
ENSG00000110925	CSRNP2	0.643996	5.13318	67.4994	2.11e-16	1.89e-14
ENSG00000175137	SH3BP5L	0.590506	5.60674	67.23	2.42e-16	2.16e-14
ENSG00000164294	GPX8	0.551726	6.10613	67.2236	2.43e-16	2.17e-14
ENSG00000108312	UBTF	-0.491476	7.41631	67.1316	2.55e-16	2.26e-14
ENSG00000110046	ATG2A	0.584949	5.62892	67.1311	2.55e-16	2.26e-14
ENSG00000114861	FOXP1	0.574254	5.68513	67.1307	2.55e-16	2.26e-14
ENSG00000167613	LAIR1	-1.27795	2.61835	67.0625	2.64e-16	2.34e-14
ENSG00000105974	CAV1	-0.474464	7.8921	67.0429	2.67e-16	2.36e-14
ENSG00000059122	FLYWCH1	0.594627	5.50848	66.89	2.88e-16	2.54e-14
ENSG00000143772	ITPKB	0.850414	3.95918	66.8651	2.92e-16	2.57e-14
ENSG00000100350	FOXRED2	-0.630343	5.27453	66.7702	3.06e-16	2.69e-14
ENSG00000261652	C15orf65	1.04293	3.14399	66.6745	3.21e-16	2.82e-14
ENSG00000124193	SRSF6	-0.457257	8.48614	66.6473	3.26e-16	2.86e-14
ENSG00000144566	RAB5A	0.501219	7.06703	66.5188	3.48e-16	3.05e-14
ENSG00000087448	KLHL42	-0.578298	5.70768	66.4941	3.52e-16	3.08e-14
ENSG00000265150	RN7SL2	0.653757	5.04428	66.3374	3.81e-16	3.33e-14
ENSG00000115520	COQ10B	0.769628	4.32141	66.0403	4.43e-16	3.87e-14
ENSG00000143575	HAX1	0.50003	7.03541	65.995	4.54e-16	3.95e-14
ENSG00000143494	VASH2	-1.90909	1.55269	65.9015	4.76e-16	4.13e-14
ENSG00000169967	MAP3K2	0.506406	6.859	65.8797	4.81e-16	4.17e-14
ENSG00000011465	DCN	-0.640839	5.0622	65.8607	4.86e-16	4.21e-14
ENSG00000134324	LPIN1	-0.699078	4.6675	65.836	4.92e-16	4.26e-14
ENSG00000140455	USP3	0.576281	5.63335	65.6924	5.29e-16	4.57e-14
ENSG00000112096	SOD2	0.484563	7.47931	65.5903	5.57e-16	4.8e-14
ENSG00000127423	AUNIP	0.683202	4.77111	65.5885	5.57e-16	4.8e-14
ENSG00000183963	SMTN	-0.831783	4.01355	65.5703	5.63e-16	4.84e-14
ENSG00000162639	HENMT1	-0.561428	5.90259	65.5233	5.76e-16	4.95e-14
ENSG00000170425	ADORA2B	0.656301	4.92792	65.5134	5.79e-16	4.97e-14
ENSG00000205730	ITPRIPL2	0.497945	7.02288	65.3747	6.21e-16	5.32e-14
ENSG00000188112	C6orf132	1.34123	2.20995	65.2836	6.51e-16	5.57e-14
ENSG00000196843	ARID5A	1.08048	3.03922	65.2601	6.58e-16	5.62e-14
ENSG00000134717	BTF3L4	0.523109	6.45495	65.1885	6.83e-16	5.82e-14
ENSG00000140859	KIFC3	0.492102	7.0953	64.9389	7.75e-16	6.6e-14
ENSG00000106823	ECM2	1.09373	2.86455	64.7173	8.67e-16	7.37e-14
ENSG00000102384	CENPI	-0.596546	5.45002	64.6079	9.17e-16	7.78e-14
ENSG00000103485	QPRT	-0.588061	5.51347	64.5063	9.65e-16	8.18e-14
ENSG00000181026	AEN	0.509569	6.70129	64.5032	9.67e-16	8.18e-14
ENSG00000170689	HOXB9	3.31751	0.0229241	64.4359	1e-15	8.46e-14
ENSG00000168944	CEP120	0.575805	5.59338	64.4088	1.01e-15	8.56e-14
ENSG00000175283	DOLK	-0.778698	4.23001	64.252	1.1e-15	9.26e-14
ENSG00000175567	UCP2	-0.563387	5.79163	64.2356	1.11e-15	9.32e-14
ENSG00000179562	GCC1	0.690491	4.67732	64.1697	1.14e-15	9.62e-14
ENSG00000167535	CACNB3	-0.794509	4.07429	63.9355	1.29e-15	1.08e-13
ENSG00000011198	ABHD5	0.691981	4.6673	63.8999	1.31e-15	1.1e-13
ENSG00000179046	TRIML2	0.802309	4.04623	63.8746	1.33e-15	1.11e-13
ENSG00000154511	FAM69A	-0.939368	3.53257	63.8562	1.34e-15	1.12e-13
ENSG00000182481	KPNA2	-0.444755	8.57874	63.8227	1.37e-15	1.14e-13
ENSG00000109079	TNFAIP1	0.512885	6.52131	63.7953	1.38e-15	1.15e-13
ENSG00000143842	SOX13	0.627368	5.06249	63.5936	1.53e-15	1.28e-13
ENSG00000099860	GADD45B	0.783094	4.30779	63.2393	1.84e-15	1.53e-13
ENSG00000198695	MT-ND6	-0.426501	9.19932	63.1812	1.89e-15	1.57e-13
ENSG00000223496	EXOSC6	0.737195	4.39044	63.1591	1.91e-15	1.58e-13
ENSG00000100592	DAAM1	0.644298	4.91691	62.8205	2.27e-15	1.88e-13
ENSG00000186603	HPDL	-0.616329	5.22111	62.8219	2.27e-15	1.88e-13
ENSG00000180035	ZNF48	0.86931	3.67635	62.8086	2.28e-15	1.88e-13
ENSG00000176907	C8orf4	2.17327	1.00219	62.7812	2.32e-15	1.91e-13
ENSG00000138771	SHROOM3	0.607775	5.1426	62.7549	2.35e-15	1.93e-13
ENSG00000159399	HK2	0.506943	6.55143	62.593	2.55e-15	2.09e-13
ENSG00000147130	ZMYM3	-0.571835	5.54125	62.5359	2.62e-15	2.15e-13
ENSG00000217128	FNIP1	0.555122	5.92877	62.3189	2.93e-15	2.4e-13
ENSG00000113712	CSNK1A1	0.466979	7.57026	62.2232	3.08e-15	2.52e-13
ENSG00000176014	TUBB6	-0.48169	7.17944	62.2061	3.1e-15	2.53e-13
ENSG00000205269	TMEM170B	-0.916273	3.55948	62.0885	3.29e-15	2.69e-13
ENSG00000173918	C1QTNF1	-0.689874	4.65421	62.0679	3.33e-15	2.71e-13
ENSG00000170364	SETMAR	-0.749988	4.30777	61.9068	3.61e-15	2.94e-13
ENSG00000198900	TOP1	0.435433	8.63603	61.8401	3.74e-15	3.03e-13
ENSG00000165322	ARHGAP12	0.657594	4.79084	61.8033	3.81e-15	3.09e-13
ENSG00000135414	GDF11	-0.653432	4.85255	61.7907	3.83e-15	3.1e-13
ENSG00000152270	PDE3B	-0.503076	6.56589	61.5863	4.25e-15	3.44e-13
ENSG00000175215	CTDSP2	0.492057	6.76531	61.5602	4.31e-15	3.48e-13
ENSG00000009950	MLXIPL	1.76045	1.43642	61.0963	5.45e-15	4.4e-13
ENSG00000087903	RFX2	0.666019	4.6776	61.0082	5.7e-15	4.59e-13
ENSG00000068001	HYAL2	-0.630324	5.01894	60.8926	6.04e-15	4.86e-13
ENSG00000136732	GYPC	0.728327	4.2836	60.8133	6.29e-15	5.05e-13
ENSG00000198727	MT-CYB	-0.362856	11.6931	60.7766	6.41e-15	5.14e-13
ENSG00000169490	TM2D2	-0.661122	4.7959	60.7712	6.43e-15	5.15e-13
ENSG00000023608	SNAPC1	0.656438	4.7803	60.6964	6.68e-15	5.34e-13
ENSG00000100078	PLA2G3	-3.21458	0.191633	60.6779	6.74e-15	5.38e-13
ENSG00000188971	RP11-427H3.3	0.577806	5.39325	60.5126	7.33e-15	5.85e-13
ENSG00000105443	CYTH2	0.612701	5.07399	60.3817	7.83e-15	6.24e-13
ENSG00000186807	ANXA8L2	-0.839602	3.84878	60.3293	8.05e-15	6.4e-13
ENSG00000034152	MAP2K3	0.607729	5.15384	60.1849	8.66e-15	6.88e-13
ENSG00000146373	RNF217	0.61305	5.03167	60.1253	8.92e-15	7.08e-13
ENSG00000120694	HSPH1	-0.441993	8.21152	60.0934	9.07e-15	7.19e-13
ENSG00000182093	WRB	-0.614546	5.11573	59.9324	9.84e-15	7.79e-13
ENSG00000096060	FKBP5	-0.458065	7.58696	59.8643	1.02e-14	8.04e-13
ENSG00000185634	SHC4	1.2492	2.25635	59.8669	1.02e-14	8.04e-13
ENSG00000110395	CBL	0.531081	5.87686	59.7849	1.06e-14	8.36e-13
ENSG00000167797	CDK2AP2	0.598165	5.25007	59.7773	1.07e-14	8.38e-13
ENSG00000251022	THAP9-AS1	0.527531	5.98326	59.7319	1.09e-14	8.56e-13
ENSG00000177479	ARIH2	0.496316	6.54468	59.7034	1.11e-14	8.68e-13
ENSG00000136560	TANK	0.569783	5.39616	59.4631	1.25e-14	9.79e-13
ENSG00000129521	EGLN3	-1.22771	2.43879	59.4263	1.27e-14	9.96e-13
ENSG00000180694	TMEM64	-0.618794	5.04771	59.2424	1.4e-14	1.09e-12
ENSG00000096384	HSP90AB1	-0.366319	11.3043	59.2133	1.42e-14	1.11e-12
ENSG00000118985	ELL2	0.45259	7.65938	59.1733	1.45e-14	1.13e-12
ENSG00000155130	MARCKS	-0.500283	6.44654	59.1655	1.45e-14	1.13e-12
ENSG00000042445	RETSAT	0.477803	6.89277	59.1336	1.48e-14	1.15e-12
ENSG00000153823	PID1	0.579832	5.25221	59.1344	1.48e-14	1.15e-12
ENSG00000166963	MAP1A	-1.11445	2.76801	58.9963	1.58e-14	1.23e-12
ENSG00000185344	ATP6V0A2	0.543544	5.68644	59.0004	1.58e-14	1.23e-12
ENSG00000179335	CLK3	0.518748	6.05891	58.9181	1.65e-14	1.27e-12
ENSG00000106089	STX1A	0.766478	4.09974	58.9089	1.66e-14	1.28e-12
ENSG00000111670	GNPTAB	-0.479978	6.86352	58.8635	1.69e-14	1.31e-12
ENSG00000133111	RFXAP	0.891685	3.49604	58.8531	1.7e-14	1.31e-12
ENSG00000177666	PNPLA2	0.508637	6.25448	58.809	1.74e-14	1.34e-12
ENSG00000185585	OLFML2A	-0.603469	5.09441	58.8152	1.74e-14	1.34e-12
ENSG00000074590	NUAK1	0.700334	4.33881	58.7341	1.81e-14	1.39e-12
ENSG00000115649	CNPPD1	0.629503	4.87855	58.6618	1.88e-14	1.44e-12
ENSG00000205765	C5orf51	0.462293	7.31361	58.6629	1.88e-14	1.44e-12
ENSG00000011426	ANLN	-0.427269	8.51563	58.6373	1.9e-14	1.45e-12
ENSG00000080824	HSP90AA1	-0.35653	11.6807	58.5741	1.96e-14	1.5e-12
ENSG00000188612	SUMO2	-0.445699	7.84198	58.5656	1.97e-14	1.5e-12
ENSG00000198223	CSF2RA	2.7039	0.285004	58.554	1.98e-14	1.51e-12
ENSG00000178567	EPM2AIP1	-0.526963	5.95103	58.5147	2.02e-14	1.54e-12
ENSG00000111981	ULBP1	1.36337	2.00531	58.4793	2.06e-14	1.56e-12
ENSG00000154217	PITPNC1	0.499792	6.3334	58.3882	2.16e-14	1.63e-12
ENSG00000135540	NHSL1	0.7522	4.03027	58.2584	2.3e-14	1.74e-12
ENSG00000123405	NFE2	-1.41402	1.86244	58.2415	2.32e-14	1.76e-12
ENSG00000185515	BRCC3	-0.522782	5.96734	58.1757	2.4e-14	1.81e-12
ENSG00000152127	MGAT5	-0.584117	5.25798	58.1623	2.42e-14	1.82e-12
ENSG00000150764	DIXDC1	-0.737309	4.18013	58.1519	2.43e-14	1.83e-12
ENSG00000167995	BEST1	1.85004	1.28159	57.9866	2.65e-14	1.99e-12
ENSG00000136720	HS6ST1	-0.707239	4.38225	57.9205	2.74e-14	2.05e-12
ENSG00000066468	FGFR2	-0.626244	4.98325	57.8098	2.89e-14	2.17e-12
ENSG00000108821	COL1A1	0.48121	6.68927	57.6825	3.09e-14	2.31e-12
ENSG00000143367	TUFT1	0.625354	4.93583	57.5916	3.23e-14	2.42e-12
ENSG00000160741	CRTC2	0.536738	5.68066	57.538	3.32e-14	2.48e-12
ENSG00000164124	TMEM144	-0.946543	3.27589	57.3169	3.72e-14	2.77e-12
ENSG00000124181	PLCG1	-0.500378	6.29556	57.1988	3.95e-14	2.94e-12
ENSG00000136869	TLR4	0.667302	4.4876	57.16	4.03e-14	3e-12
ENSG00000162704	ARPC5	-0.437599	7.9268	57.1503	4.05e-14	3.01e-12
ENSG00000110330	BIRC2	0.457542	7.23326	57.1301	4.09e-14	3.03e-12
ENSG00000154639	CXADR	0.515362	5.98926	57.1304	4.09e-14	3.03e-12
ENSG00000125772	GPCPD1	0.653879	4.70772	56.925	4.54e-14	3.36e-12
ENSG00000023287	RB1CC1	0.475757	6.73821	56.7967	4.84e-14	3.58e-12
ENSG00000112319	EYA4	0.484824	6.53419	56.7886	4.86e-14	3.59e-12
ENSG00000169087	HSPBAP1	0.915046	3.36525	56.7841	4.88e-14	3.6e-12
ENSG00000161326	DUSP14	0.546747	5.51831	56.7762	4.9e-14	3.61e-12
ENSG00000130939	UBE4B	-0.472689	6.82003	56.6963	5.1e-14	3.75e-12
ENSG00000131871	VIMP	0.496818	6.30035	56.6775	5.15e-14	3.78e-12
ENSG00000163635	ATXN7	0.533164	5.68689	56.6721	5.16e-14	3.79e-12
ENSG00000163659	TIPARP	0.492643	6.44064	56.6512	5.22e-14	3.82e-12
ENSG00000107957	SH3PXD2A	-0.465442	7.03293	56.6456	5.23e-14	3.83e-12
ENSG00000108852	MPP2	-1.44976	1.8817	56.5291	5.55e-14	4.06e-12
ENSG00000139651	ZNF740	0.493448	6.3164	56.4479	5.78e-14	4.22e-12
ENSG00000187325	TAF9B	-0.56254	5.37486	56.3089	6.21e-14	4.53e-12
ENSG00000116096	SPR	-0.579094	5.24627	56.2397	6.43e-14	4.68e-12
ENSG00000149428	HYOU1	0.424223	8.29229	56.1957	6.58e-14	4.78e-12
ENSG00000163347	CLDN1	1.30029	2.04538	56.1486	6.74e-14	4.89e-12
ENSG00000147124	ZNF41	0.585076	5.11249	56.0592	7.05e-14	5.11e-12
ENSG00000119938	PPP1R3C	0.510638	5.99075	56.0483	7.09e-14	5.14e-12
ENSG00000260032	LINC00657	0.408877	8.88653	55.9992	7.27e-14	5.26e-12
ENSG00000136378	ADAMTS7	-0.774447	3.9534	55.9702	7.37e-14	5.33e-12
ENSG00000165181	C9orf84	0.760345	3.89952	55.952	7.44e-14	5.37e-12
ENSG00000183808	RBM12B	-0.5635	5.37197	55.7754	8.14e-14	5.87e-12
ENSG00000182400	TRAPPC6B	0.531813	5.63522	55.7035	8.45e-14	6.08e-12
ENSG00000109046	WSB1	0.482545	6.5233	55.6637	8.62e-14	6.2e-12
ENSG00000123240	OPTN	0.547257	5.47085	55.6582	8.64e-14	6.21e-12
ENSG00000105711	SCN1B	-1.01797	3.00874	55.627	8.78e-14	6.3e-12
ENSG00000198853	RUSC2	0.597116	4.99847	55.5663	9.06e-14	6.49e-12
ENSG00000170802	FOXN2	0.528447	5.68079	55.5165	9.29e-14	6.65e-12
ENSG00000221968	FADS3	0.473262	6.66968	55.4771	9.48e-14	6.77e-12
ENSG00000068323	TFE3	0.481026	6.46411	55.4574	9.57e-14	6.83e-12
ENSG00000147155	EBP	-0.529827	5.66635	55.4528	9.59e-14	6.84e-12
ENSG00000110514	MADD	0.463722	6.86055	55.3109	1.03e-13	7.34e-12
ENSG00000114423	CBLB	0.577142	5.13777	55.313	1.03e-13	7.34e-12
ENSG00000169504	CLIC4	0.401747	9.02687	55.1295	1.13e-13	8.04e-12
ENSG00000183397	C19orf71	0.702384	4.26997	55.0663	1.17e-13	8.29e-12
ENSG00000159445	THEM4	-0.554864	5.41704	55.0509	1.18e-13	8.34e-12
ENSG00000161010	C5orf45	0.596793	5.06842	55.0429	1.18e-13	8.37e-12
ENSG00000154265	ABCA5	0.548504	5.4414	54.9816	1.22e-13	8.62e-12
ENSG00000165527	ARF6	0.469594	6.68298	54.9007	1.27e-13	8.97e-12
ENSG00000196365	LONP1	0.431859	7.81476	54.8899	1.28e-13	9.01e-12
ENSG00000162695	SLC30A7	0.486758	6.33152	54.8764	1.29e-13	9.06e-12
ENSG00000101849	TBL1X	0.459626	6.85182	54.6793	1.42e-13	1e-11
ENSG00000152147	GEMIN6	-0.597221	4.99888	54.563	1.51e-13	1.06e-11
ENSG00000101695	RNF125	0.693318	4.23738	54.4649	1.59e-13	1.11e-11
ENSG00000220804	AC093642.5	1.51858	1.6	54.1992	1.82e-13	1.27e-11
ENSG00000130703	OSBPL2	0.612822	4.83442	54.1725	1.84e-13	1.29e-11
ENSG00000174173	TRMT10C	-0.525133	5.68437	54.0984	1.91e-13	1.34e-11
ENSG00000164949	GEM	2.421	0.883774	54.0884	1.92e-13	1.34e-11
ENSG00000167552	TUBA1A	-0.455098	6.96916	53.9444	2.07e-13	1.44e-11
ENSG00000075461	CACNG4	-0.955203	3.05977	53.9271	2.09e-13	1.45e-11
ENSG00000134352	IL6ST	0.434221	7.55039	53.8999	2.11e-13	1.47e-11
ENSG00000151135	C12orf23	0.467993	6.64204	53.8204	2.2e-13	1.53e-11
ENSG00000049249	TNFRSF9	3.17244	0.0327646	53.7787	2.25e-13	1.56e-11
ENSG00000104067	TJP1	0.424473	7.86902	53.6749	2.37e-13	1.64e-11
ENSG00000166068	SPRED1	0.564851	5.18964	53.6416	2.41e-13	1.67e-11
ENSG00000135318	NT5E	0.473952	6.40783	53.6146	2.44e-13	1.69e-11
ENSG00000120685	PROSER1	0.498503	5.94873	53.6092	2.45e-13	1.69e-11
ENSG00000164318	EGFLAM	0.694216	4.2844	53.602	2.46e-13	1.7e-11
ENSG00000087303	NID2	0.424159	7.87637	53.523	2.56e-13	1.77e-11
ENSG00000169926	KLF13	0.447651	7.06123	53.4903	2.6e-13	1.79e-11
ENSG00000165388	ZNF488	-1.8275	1.22676	53.4895	2.61e-13	1.79e-11
ENSG00000124532	MRS2	-0.478282	6.40596	53.4403	2.67e-13	1.83e-11
ENSG00000116560	SFPQ	-0.392771	9.16775	53.4052	2.72e-13	1.86e-11
ENSG00000230551	CTB-89H12.4	0.653774	4.52591	53.4047	2.72e-13	1.86e-11
ENSG00000027697	IFNGR1	0.482296	6.2395	53.2402	2.96e-13	2.02e-11
ENSG00000166592	RRAD	-1.11197	2.96034	53.237	2.96e-13	2.03e-11
ENSG00000164855	TMEM184A	0.583645	4.97677	53.2218	2.99e-13	2.04e-11
ENSG00000145882	PCYOX1L	-0.986082	3.05967	53.1431	3.11e-13	2.12e-11
ENSG00000185633	NDUFA4L2	1.12241	2.52428	53.0963	3.18e-13	2.17e-11
ENSG00000162290	DCP1A	0.550868	5.3333	53.0924	3.19e-13	2.17e-11
ENSG00000273033	RP11-67L2.2	1.00405	2.93196	53.0651	3.23e-13	2.2e-11
ENSG00000083857	FAT1	-0.730851	3.99185	53.0367	3.28e-13	2.22e-11
ENSG00000215424	MCM3AP-AS1	-0.711187	4.12467	53.0364	3.28e-13	2.22e-11
ENSG00000011422	PLAUR	0.49874	5.92261	53.0032	3.34e-13	2.26e-11
ENSG00000174243	DDX23	-0.433263	7.53118	53.0003	3.34e-13	2.26e-11
ENSG00000171314	PGAM1	-0.429051	7.67322	52.9898	3.36e-13	2.27e-11
ENSG00000106462	EZH2	0.437824	7.33888	52.9733	3.39e-13	2.28e-11
ENSG00000230183	CNOT6LP1	1.1497	2.4954	52.973	3.39e-13	2.28e-11
ENSG00000164136	IL15	0.875182	3.32597	52.9294	3.46e-13	2.33e-11
ENSG00000163214	DHX57	-0.495906	6.02823	52.8519	3.6e-13	2.42e-11
ENSG00000100302	RASD2	0.728171	3.94812	52.8327	3.64e-13	2.44e-11
ENSG00000138162	TACC2	0.519737	5.61475	52.8142	3.67e-13	2.47e-11
ENSG00000091622	PITPNM3	-0.663635	4.37451	52.7521	3.79e-13	2.54e-11
ENSG00000135604	STX11	1.01363	2.97338	52.6762	3.94e-13	2.64e-11
ENSG00000109189	USP46	-0.769883	3.88013	52.6601	3.97e-13	2.66e-11
ENSG00000268205	CTC-444N24.11	0.752455	3.98054	52.5823	4.13e-13	2.76e-11
ENSG00000204186	ZDBF2	0.584013	4.95664	52.5477	4.21e-13	2.81e-11
ENSG00000129250	KIF1C	-0.428994	7.60204	52.5441	4.22e-13	2.81e-11
ENSG00000173548	SNX33	0.542114	5.32372	52.4207	4.49e-13	2.99e-11
ENSG00000173221	GLRX	0.74202	3.90411	52.4121	4.51e-13	3e-11
ENSG00000138074	SLC5A6	-0.586921	5.01746	52.3107	4.75e-13	3.15e-11
ENSG00000145386	CCNA2	-0.431122	7.50506	52.3115	4.75e-13	3.15e-11
ENSG00000185813	PCYT2	-0.628967	4.67568	52.1944	5.04e-13	3.34e-11
ENSG00000129354	AP1M2	-0.582841	5.0079	52.1033	5.28e-13	3.49e-11
ENSG00000100485	SOS2	0.542529	5.28485	52.0937	5.3e-13	3.5e-11
ENSG00000197256	KANK2	-0.45494	6.73859	52.0808	5.34e-13	3.52e-11
ENSG00000153933	DGKE	0.519821	5.57552	52.0716	5.36e-13	3.54e-11
ENSG00000235655	H3F3AP4	-0.510257	5.68957	52.061	5.39e-13	3.55e-11
ENSG00000151693	ASAP2	0.577664	4.95614	52.0573	5.4e-13	3.55e-11
ENSG00000148426	PROSER2	0.666681	4.29183	52.0255	5.49e-13	3.61e-11
ENSG00000073008	PVR	0.455662	6.71127	52.0095	5.53e-13	3.63e-11
ENSG00000101493	ZNF516	0.698417	4.14134	51.9107	5.82e-13	3.82e-11
ENSG00000003436	TFPI	0.471393	6.31753	51.7811	6.22e-13	4.07e-11
ENSG00000071537	SEL1L	0.44609	6.96201	51.7073	6.46e-13	4.22e-11
ENSG00000122218	COPA	0.397961	8.64173	51.6914	6.51e-13	4.25e-11
ENSG00000259744	RP11-138H8.6	2.36856	0.408165	51.6515	6.64e-13	4.34e-11
ENSG00000104081	BMF	-1.78063	1.33414	51.5573	6.97e-13	4.54e-11
ENSG00000111711	GOLT1B	0.468336	6.4034	51.3567	7.72e-13	5.03e-11
ENSG00000104312	RIPK2	0.613561	4.68533	51.2404	8.19e-13	5.32e-11
ENSG00000150527	CTAGE5	1.49245	1.60319	51.2399	8.19e-13	5.32e-11
ENSG00000165312	OTUD1	0.598732	4.80752	51.207	8.33e-13	5.41e-11
ENSG00000135750	KCNK1	0.568602	5.03207	51.1881	8.41e-13	5.45e-11
ENSG00000112039	FANCE	0.627627	4.59152	51.1796	8.45e-13	5.47e-11
ENSG00000208028	MIR616	2.87011	0.280554	51.1021	8.79e-13	5.68e-11
ENSG00000136002	ARHGEF4	0.517473	5.50908	51.0505	9.02e-13	5.83e-11
ENSG00000143493	INTS7	0.490778	5.91364	50.9852	9.32e-13	6.02e-11
ENSG00000198786	MT-ND5	-0.334553	11.5688	50.9577	9.46e-13	6.1e-11
ENSG00000166783	KIAA0430	0.488818	5.9366	50.9024	9.73e-13	6.26e-11
ENSG00000100814	CCNB1IP1	0.548387	5.23243	50.8801	9.84e-13	6.33e-11
ENSG00000167088	SNRPD1	-0.458255	6.55715	50.8431	1e-12	6.44e-11
ENSG00000175130	MARCKSL1	-0.662854	4.37243	50.7786	1.04e-12	6.65e-11
ENSG00000213516	RBMXL1	-0.552978	5.17378	50.6113	1.13e-12	7.23e-11
ENSG00000119596	YLPM1	-0.469063	6.30716	50.547	1.17e-12	7.47e-11
ENSG00000125968	ID1	-0.402027	8.30599	50.5281	1.18e-12	7.53e-11
ENSG00000147905	ZCCHC7	0.567727	5.01678	50.495	1.2e-12	7.65e-11
ENSG00000136048	DRAM1	0.437497	6.97902	50.4717	1.21e-12	7.72e-11
ENSG00000171206	TRIM8	0.59031	4.77764	50.4801	1.21e-12	7.7e-11
ENSG00000113070	HBEGF	0.858546	3.35951	50.43	1.24e-12	7.88e-11
ENSG00000135365	PHF21A	0.538401	5.21413	50.3919	1.26e-12	8.02e-11
ENSG00000143569	UBAP2L	-0.402964	8.2453	50.3924	1.26e-12	8.02e-11
ENSG00000100075	SLC25A1	-0.522839	5.46386	50.1876	1.4e-12	8.89e-11
ENSG00000100226	GTPBP1	0.495986	5.75676	50.1832	1.4e-12	8.9e-11
ENSG00000163512	AZI2	0.507044	5.59816	50.126	1.44e-12	9.15e-11
ENSG00000143776	CDC42BPA	0.454994	6.467	50.0653	1.49e-12	9.43e-11
ENSG00000162980	ARL5A	-0.492458	5.82929	49.7078	1.79e-12	1.13e-10
ENSG00000142178	SIK1	0.38978	8.69575	49.6442	1.85e-12	1.17e-10
ENSG00000159131	GART	0.402116	8.12542	49.6397	1.85e-12	1.17e-10
ENSG00000162734	PEA15	0.450091	6.58009	49.5468	1.94e-12	1.22e-10
ENSG00000249306	RP11-267A15.1	1.05487	2.6518	49.516	1.97e-12	1.24e-10
ENSG00000066455	GOLGA5	0.460961	6.34543	49.4295	2.06e-12	1.3e-10
ENSG00000072195	SPEG	-0.80448	3.55279	49.3782	2.11e-12	1.33e-10
ENSG00000148572	NRBF2	0.544386	5.1733	49.3838	2.11e-12	1.32e-10
ENSG00000179454	KLHL28	0.775078	3.69023	49.2856	2.22e-12	1.39e-10
ENSG00000147642	SYBU	0.743094	3.79303	49.2575	2.25e-12	1.41e-10
ENSG00000165943	MOAP1	0.776612	3.68652	49.1518	2.37e-12	1.48e-10
ENSG00000248008	DYNLL1-AS1	-0.74508	3.91419	49.0995	2.44e-12	1.52e-10
ENSG00000125148	MT2A	0.377186	9.12532	49.0928	2.45e-12	1.53e-10
ENSG00000104228	TRIM35	0.64353	4.35429	49.064	2.48e-12	1.55e-10
ENSG00000188522	FAM83G	0.499997	5.64797	49.0658	2.48e-12	1.55e-10
ENSG00000188486	H2AFX	-0.462423	6.33889	48.9861	2.58e-12	1.61e-10
ENSG00000136100	VPS36	-0.46133	6.34491	48.9754	2.6e-12	1.61e-10
ENSG00000196305	IARS	0.383147	8.81418	48.9157	2.68e-12	1.66e-10
ENSG00000005486	RHBDD2	0.482144	5.8824	48.8287	2.8e-12	1.73e-10
ENSG00000240184	PCDHGC3	-0.695603	4.0824	48.8252	2.8e-12	1.74e-10
ENSG00000070444	MNT	0.54404	5.14398	48.7176	2.96e-12	1.83e-10
ENSG00000119977	TCTN3	-0.490067	5.78824	48.6639	3.04e-12	1.88e-10
ENSG00000261770	CTC-459F4.1	1.63996	1.16787	48.5956	3.15e-12	1.95e-10
ENSG00000172965	MIR4435-1HG	0.569112	4.87652	48.5326	3.25e-12	2.01e-10
ENSG00000114541	FRMD4B	1.09622	2.41531	48.5267	3.26e-12	2.01e-10
ENSG00000144746	ARL6IP5	-0.447666	6.52779	48.4895	3.33e-12	2.05e-10
ENSG00000127481	UBR4	0.388491	8.48385	48.477	3.35e-12	2.06e-10
ENSG00000101888	NXT2	-0.669103	4.19821	48.3209	3.63e-12	2.23e-10
ENSG00000068305	MEF2A	0.443671	6.58651	48.2845	3.69e-12	2.27e-10
ENSG00000154370	TRIM11	0.556889	5.03606	48.2592	3.74e-12	2.29e-10
ENSG00000120053	GOT1	0.445111	6.54194	48.0811	4.1e-12	2.51e-10
ENSG00000156017	C9orf41	-0.505292	5.55229	48.0509	4.16e-12	2.54e-10
ENSG00000096746	HNRNPH3	-0.403032	7.8653	48.0402	4.18e-12	2.55e-10
ENSG00000152518	ZFP36L2	0.490961	5.74188	48.0083	4.25e-12	2.59e-10
ENSG00000135046	ANXA1	0.392743	8.22277	47.9666	4.34e-12	2.65e-10
ENSG00000205413	SAMD9	-1.05232	2.58051	47.9322	4.42e-12	2.69e-10
ENSG00000155313	USP25	0.456851	6.253	47.9295	4.43e-12	2.69e-10
ENSG00000095397	DFNB31	0.487025	5.77347	47.9228	4.44e-12	2.7e-10
ENSG00000115041	KCNIP3	-0.644097	4.39557	47.8856	4.53e-12	2.75e-10
ENSG00000105778	AVL9	0.487143	5.75116	47.8306	4.65e-12	2.82e-10
ENSG00000128335	APOL2	-0.681035	4.15924	47.7054	4.96e-12	3.01e-10
ENSG00000166579	NDEL1	0.465752	6.09532	47.5852	5.28e-12	3.19e-10
ENSG00000140350	ANP32A	-0.407432	7.60484	47.5637	5.33e-12	3.22e-10
ENSG00000100422	CERK	-0.465704	6.10548	47.5483	5.38e-12	3.25e-10
ENSG00000152990	GPR125	-0.51202	5.43774	47.4974	5.52e-12	3.33e-10
ENSG00000047230	CTPS2	-0.56426	4.91345	47.4905	5.54e-12	3.34e-10
ENSG00000129195	FAM64A	-0.572333	4.88222	47.3969	5.81e-12	3.5e-10
ENSG00000198938	MT-CO3	-0.292161	13.2501	47.2875	6.14e-12	3.69e-10
ENSG00000073910	FRY	0.914849	2.9024	47.2694	6.2e-12	3.72e-10
ENSG00000106785	TRIM14	-0.489451	5.64611	47.2589	6.23e-12	3.74e-10
ENSG00000078747	ITCH	0.422512	7.03304	47.1568	6.56e-12	3.93e-10
ENSG00000198467	TPM2	-0.391215	8.17984	47.1467	6.6e-12	3.95e-10
ENSG00000268470	DNAH17-AS1	0.847891	3.25448	46.9666	7.23e-12	4.33e-10
ENSG00000151694	ADAM17	0.537705	5.10111	46.9097	7.45e-12	4.45e-10
ENSG00000196526	AFAP1	0.43158	6.71645	46.9001	7.48e-12	4.47e-10
ENSG00000189403	HMGB1	-0.389744	8.19434	46.8897	7.52e-12	4.49e-10
ENSG00000076604	TRAF4	0.454158	6.20628	46.8845	7.54e-12	4.49e-10
ENSG00000077713	SLC25A43	-0.536747	5.11047	46.8762	7.57e-12	4.51e-10
ENSG00000157184	CPT2	-0.5592	4.97466	46.8359	7.73e-12	4.6e-10
ENSG00000088179	PTPN4	0.555911	4.9146	46.8319	7.75e-12	4.6e-10
ENSG00000075618	FSCN1	-0.377051	8.69818	46.6793	8.37e-12	4.97e-10
ENSG00000127507	EMR2	0.488201	5.56926	46.5383	9e-12	5.33e-10
ENSG00000272405	RP11-284F21.10	0.744383	3.65548	46.4625	9.35e-12	5.54e-10
ENSG00000136450	SRSF1	-0.370954	8.93474	46.4316	9.5e-12	5.62e-10
ENSG00000176102	CSTF3	-0.467469	5.93339	46.2719	1.03e-11	6.09e-10
ENSG00000170540	ARL6IP1	-0.386475	8.22428	46.2127	1.06e-11	6.27e-10
ENSG00000164040	PGRMC2	0.424592	6.80043	45.8757	1.26e-11	7.43e-10
ENSG00000250509	CTC-573N18.1	3.16417	-0.341586	45.884	1.26e-11	7.41e-10
ENSG00000165118	C9orf64	0.497045	5.44817	45.8209	1.3e-11	7.64e-10
ENSG00000272068	RP11-284F21.9	1.24898	1.82359	45.8193	1.3e-11	7.64e-10
ENSG00000110880	CORO1C	-0.426908	6.71932	45.7613	1.34e-11	7.86e-10
ENSG00000177889	UBE2N	-0.428978	6.68586	45.7378	1.35e-11	7.94e-10
ENSG00000173295	FAM86B3P	0.845608	3.1931	45.7253	1.36e-11	7.99e-10
ENSG00000173391	OLR1	1.1563	2.12072	45.6774	1.4e-11	8.18e-10
ENSG00000069956	MAPK6	0.415611	7.05663	45.6651	1.41e-11	8.22e-10
ENSG00000099875	MKNK2	0.421179	6.86325	45.5677	1.48e-11	8.63e-10
ENSG00000163472	TMEM79	0.734966	3.72626	45.508	1.52e-11	8.89e-10
ENSG00000140836	ZFHX3	0.430258	6.56456	45.4582	1.56e-11	9.09e-10
ENSG00000160326	SLC2A6	-0.463215	5.93382	45.4618	1.56e-11	9.08e-10
ENSG00000165185	KIAA1958	0.587583	4.59	45.4657	1.56e-11	9.07e-10
ENSG00000167553	TUBA1C	-0.361543	9.20358	45.4452	1.57e-11	9.14e-10
ENSG00000095139	ARCN1	0.397205	7.63873	45.4027	1.61e-11	9.33e-10
ENSG00000124151	NCOA3	0.410453	7.13834	45.3972	1.61e-11	9.35e-10
ENSG00000179820	MYADM	0.502947	5.32343	45.3249	1.67e-11	9.69e-10
ENSG00000169379	ARL13B	0.490446	5.49168	45.266	1.72e-11	9.98e-10
ENSG00000127666	TICAM1	0.602993	4.50032	45.244	1.74e-11	1.01e-09
ENSG00000155368	DBI	-0.418715	6.89539	45.1408	1.84e-11	1.06e-09
ENSG00000196656	AC004057.1	-0.751388	3.72407	45.1286	1.85e-11	1.07e-09
ENSG00000108932	SLC16A6	0.547512	5.0629	45.0977	1.88e-11	1.08e-09
ENSG00000121858	TNFSF10	-1.53164	1.25077	45.076	1.9e-11	1.09e-09
ENSG00000156413	FUT6	0.732546	3.72503	45.0519	1.92e-11	1.11e-09
ENSG00000156671	SAMD8	0.503774	5.34186	44.9989	1.97e-11	1.14e-09
ENSG00000140367	UBE2Q2	-0.455188	6.07672	44.9218	2.05e-11	1.18e-09
ENSG00000144233	AMMECR1L	0.518361	5.18606	44.9282	2.05e-11	1.18e-09
ENSG00000123595	RAB9A	0.579241	4.67204	44.8165	2.17e-11	1.24e-09
ENSG00000095951	HIVEP1	0.496041	5.41302	44.7731	2.22e-11	1.27e-09
ENSG00000145911	N4BP3	0.535062	4.97161	44.7194	2.28e-11	1.3e-09
ENSG00000157657	ZNF618	-0.570394	4.67278	44.7132	2.28e-11	1.31e-09
ENSG00000154781	CCDC174	0.512077	5.26679	44.7096	2.29e-11	1.31e-09
ENSG00000116791	CRYZ	-0.463672	5.8762	44.6399	2.37e-11	1.35e-09
ENSG00000142867	BCL10	0.558122	4.80569	44.5528	2.48e-11	1.41e-09
ENSG00000157600	TMEM164	-0.523795	5.14005	44.5508	2.48e-11	1.41e-09
ENSG00000182827	ACBD3	0.456013	6.01254	44.4972	2.55e-11	1.45e-09
ENSG00000138032	PPM1B	0.466453	5.80324	44.4668	2.59e-11	1.47e-09
ENSG00000100330	MTMR3	0.518666	5.13329	44.4247	2.65e-11	1.5e-09
ENSG00000186470	BTN3A2	-0.457261	5.96617	44.4116	2.67e-11	1.51e-09
ENSG00000135525	MAP7	0.45227	6.04354	44.3493	2.75e-11	1.56e-09
ENSG00000140577	CRTC3	0.410843	6.97397	44.3533	2.75e-11	1.56e-09
ENSG00000242247	ARFGAP3	0.450943	6.05824	44.3419	2.76e-11	1.56e-09
ENSG00000163703	CRELD1	0.531415	5.10512	44.3276	2.78e-11	1.57e-09
ENSG00000185745	IFIT1	-1.14013	2.697	44.3245	2.79e-11	1.57e-09
ENSG00000141627	DYM	0.5208	5.12978	44.3182	2.8e-11	1.58e-09
ENSG00000095787	WAC	0.396788	7.44369	44.2858	2.84e-11	1.6e-09
ENSG00000162636	FAM102B	0.408714	7.03584	44.265	2.87e-11	1.62e-09
ENSG00000187079	TEAD1	0.370358	8.51528	44.2199	2.94e-11	1.65e-09
ENSG00000151090	THRB	0.50927	5.185	44.1663	3.02e-11	1.7e-09
ENSG00000171492	LRRC8D	0.427482	6.47827	44.1221	3.09e-11	1.73e-09
ENSG00000178761	FAM219B	0.457661	5.87643	44.1175	3.1e-11	1.74e-09
ENSG00000077238	IL4R	0.49095	5.36881	44.0855	3.15e-11	1.76e-09
ENSG00000101447	FAM83D	-0.410247	7.02696	44.0364	3.23e-11	1.81e-09
ENSG00000082641	NFE2L1	0.379715	8.07653	44.0012	3.29e-11	1.84e-09
ENSG00000198625	MDM4	0.469926	5.7168	43.926	3.42e-11	1.91e-09
ENSG00000101190	TCFL5	-0.522534	5.10993	43.8582	3.54e-11	1.97e-09
ENSG00000115009	CCL20	2.65105	0.273839	43.8429	3.56e-11	1.99e-09
ENSG00000020633	RUNX3	0.73159	3.64014	43.7667	3.7e-11	2.06e-09
ENSG00000166188	ZNF319	0.648899	4.09599	43.7486	3.74e-11	2.08e-09
ENSG00000106299	WASL	0.431267	6.35622	43.7388	3.76e-11	2.09e-09
ENSG00000165006	UBAP1	0.453497	5.92112	43.7362	3.76e-11	2.09e-09
ENSG00000149596	JPH2	-0.672667	3.94272	43.7219	3.79e-11	2.1e-09
ENSG00000198804	MT-CO1	-0.265722	14.1854	43.6862	3.86e-11	2.14e-09
ENSG00000107789	MINPP1	-0.506012	5.29586	43.6582	3.92e-11	2.17e-09
ENSG00000168496	FEN1	-0.401253	7.24994	43.586	4.06e-11	2.25e-09
ENSG00000198948	MFAP3L	0.910346	2.84104	43.4688	4.31e-11	2.38e-09
ENSG00000186832	KRT16	0.798229	3.31934	43.451	4.35e-11	2.4e-09
ENSG00000203668	CHML	-0.423428	6.49937	43.4465	4.36e-11	2.41e-09
ENSG00000163378	EOGT	-0.586504	4.5476	43.3899	4.49e-11	2.47e-09
ENSG00000116741	RGS2	0.551884	4.82347	43.2283	4.88e-11	2.68e-09
ENSG00000108590	MED31	-0.731852	3.66349	43.1914	4.97e-11	2.73e-09
ENSG00000161091	MFSD12	0.360994	8.78137	43.1679	5.03e-11	2.76e-09
ENSG00000104524	PYCRL	-0.582938	4.58569	43.0488	5.35e-11	2.93e-09
ENSG00000164163	ABCE1	-0.40719	6.91278	43.043	5.36e-11	2.94e-09
ENSG00000065621	GSTO2	2.33628	0.221434	42.9956	5.49e-11	3.01e-09
ENSG00000154144	TBRG1	0.601358	4.41099	42.9875	5.52e-11	3.02e-09
ENSG00000231721	LINC-PINT	0.887048	2.92606	42.9873	5.52e-11	3.02e-09
ENSG00000100596	SPTLC2	0.442808	6.0313	42.904	5.76e-11	3.15e-09
ENSG00000115904	SOS1	0.394697	7.25795	42.8783	5.83e-11	3.18e-09
ENSG00000174469	CNTNAP2	0.705173	3.6937	42.8547	5.9e-11	3.22e-09
ENSG00000171848	RRM2	-0.37176	8.20683	42.718	6.33e-11	3.45e-09
ENSG00000172732	MUS81	0.486398	5.36141	42.7076	6.37e-11	3.46e-09
ENSG00000181577	C6orf223	-0.585229	4.44994	42.6704	6.49e-11	3.53e-09
ENSG00000143753	DEGS1	-0.438042	6.15829	42.6366	6.6e-11	3.59e-09
ENSG00000268388	FENDRR	-0.73775	3.61035	42.5686	6.83e-11	3.71e-09
ENSG00000151689	INPP1	0.55032	4.725	42.5206	7e-11	3.8e-09
ENSG00000163898	LIPH	1.19917	1.8843	42.4754	7.17e-11	3.88e-09
ENSG00000130779	CLIP1	0.37298	8.0722	42.4648	7.21e-11	3.9e-09
ENSG00000109919	MTCH2	-0.398811	7.1486	42.4499	7.26e-11	3.93e-09
ENSG00000187775	DNAH17	0.541101	4.81192	42.4433	7.29e-11	3.94e-09
ENSG00000179409	GEMIN4	-0.432303	6.25387	42.4191	7.38e-11	3.98e-09
ENSG00000260630	SNAI3-AS1	-1.44374	1.49882	42.4183	7.38e-11	3.98e-09
ENSG00000123505	AMD1	-0.384873	7.59596	42.4142	7.4e-11	3.98e-09
ENSG00000162783	IER5	0.601485	4.41162	42.3472	7.65e-11	4.12e-09
ENSG00000107159	CA9	0.678636	3.84806	42.323	7.75e-11	4.17e-09
ENSG00000072364	AFF4	0.380415	7.74097	42.2966	7.85e-11	4.22e-09
ENSG00000137959	IFI44L	-0.884914	2.85662	42.277	7.93e-11	4.26e-09
ENSG00000116199	FAM20B	-0.408629	6.81248	42.2666	7.97e-11	4.28e-09
ENSG00000176692	FOXC2	0.794211	3.29712	42.2136	8.19e-11	4.39e-09
ENSG00000037637	FBXO42	0.512497	5.07257	42.1296	8.55e-11	4.58e-09
ENSG00000114812	VIPR1	-0.82618	3.12544	42.0646	8.84e-11	4.73e-09
ENSG00000106789	CORO2A	0.546269	4.69982	42.0285	9.01e-11	4.81e-09
ENSG00000125686	MED1	0.393357	7.18013	42.0015	9.13e-11	4.87e-09
ENSG00000175387	SMAD2	0.389499	7.34115	41.9942	9.17e-11	4.89e-09
ENSG00000144747	TMF1	0.434962	6.13043	41.9864	9.2e-11	4.9e-09
ENSG00000006453	BAIAP2L1	0.451879	5.74088	41.8712	9.76e-11	5.2e-09
ENSG00000170734	POLH	-0.511973	5.08713	41.8567	9.83e-11	5.23e-09
ENSG00000153214	TMEM87B	0.516152	4.99297	41.791	1.02e-10	5.4e-09
ENSG00000149591	TAGLN	-0.737822	3.54028	41.7706	1.03e-10	5.45e-09
ENSG00000100664	EIF5	0.359472	8.5735	41.7544	1.04e-10	5.49e-09
ENSG00000120899	PTK2B	0.571941	4.43239	41.7517	1.04e-10	5.5e-09
ENSG00000120337	TNFSF18	3.26623	-0.617754	41.7199	1.05e-10	5.57e-09
ENSG00000169957	ZNF768	0.521379	4.96252	41.7229	1.05e-10	5.57e-09
ENSG00000172007	RAB33B	0.616788	4.26405	41.7195	1.05e-10	5.57e-09
ENSG00000240230	COX19	0.571399	4.55345	41.6653	1.08e-10	5.72e-09
ENSG00000118418	HMGN3	-0.427286	6.26195	41.6546	1.09e-10	5.75e-09
ENSG00000144647	POMGNT2	-0.980602	2.64032	41.6616	1.09e-10	5.73e-09
ENSG00000102572	STK24	0.420621	6.3432	41.5424	1.15e-10	6.08e-09
ENSG00000052749	RRP12	0.411121	6.60534	41.5275	1.16e-10	6.12e-09
ENSG00000128928	IVD	-0.444385	5.91665	41.536	1.16e-10	6.09e-09
ENSG00000010017	RANBP9	0.410991	6.61575	41.5143	1.17e-10	6.15e-09
ENSG00000217801	RP11-465B22.3	0.972481	2.6953	41.4252	1.23e-10	6.43e-09
ENSG00000107130	NCS1	-0.386203	7.40307	41.3864	1.25e-10	6.55e-09
ENSG00000226738	CTA-384D8.31	3.93705	-0.831585	41.3452	1.28e-10	6.69e-09
ENSG00000162664	ZNF326	-0.412675	6.5727	41.3287	1.29e-10	6.73e-09
ENSG00000188554	NBR1	0.390784	7.17876	41.3295	1.29e-10	6.73e-09
ENSG00000188636	LDOC1L	0.419109	6.39227	41.2728	1.33e-10	6.92e-09
ENSG00000143624	INTS3	-0.392851	7.12913	41.204	1.37e-10	7.16e-09
ENSG00000116786	PLEKHM2	0.43082	6.12769	41.0758	1.47e-10	7.64e-09
ENSG00000100906	NFKBIA	0.441411	5.97555	41.0111	1.52e-10	7.89e-09
ENSG00000121644	DESI2	0.387187	7.25565	40.9988	1.53e-10	7.93e-09
ENSG00000187479	C11orf96	4.45083	-0.64298	40.9904	1.53e-10	7.96e-09
ENSG00000120699	EXOSC8	0.44854	5.7586	40.9765	1.54e-10	8.01e-09
ENSG00000121005	CRISPLD1	-0.543467	4.71215	40.9716	1.55e-10	8.02e-09
ENSG00000145725	PPIP5K2	-0.415519	6.42717	40.966	1.55e-10	8.04e-09
ENSG00000080819	CPOX	-0.562288	4.62723	40.9517	1.56e-10	8.09e-09
ENSG00000148773	MKI67	-0.350594	8.79565	40.9063	1.6e-10	8.27e-09
ENSG00000134013	LOXL2	0.411518	6.46878	40.8231	1.67e-10	8.63e-09
ENSG00000136628	EPRS	0.355669	8.5342	40.8184	1.67e-10	8.64e-09
ENSG00000154328	NEIL2	-0.746771	3.55798	40.7232	1.76e-10	9.06e-09
ENSG00000113387	SUB1	-0.358598	8.39188	40.7067	1.77e-10	9.13e-09
ENSG00000049130	KITLG	-0.536643	4.72458	40.686	1.79e-10	9.22e-09
ENSG00000141429	GALNT1	-0.450901	5.69245	40.6784	1.8e-10	9.25e-09
ENSG00000020129	NCDN	-0.487029	5.26622	40.5985	1.87e-10	9.62e-09
ENSG00000109501	WFS1	-0.559958	4.6048	40.6052	1.87e-10	9.59e-09
ENSG00000095574	IKZF5	0.530374	4.82089	40.5856	1.88e-10	9.66e-09
ENSG00000136603	SKIL	0.388743	7.14684	40.5888	1.88e-10	9.66e-09
ENSG00000204084	INPP5B	0.564422	4.5483	40.5196	1.95e-10	9.99e-09
ENSG00000181704	YIPF6	0.433136	6.01939	40.5079	1.96e-10	1e-08
ENSG00000095794	CREM	0.704709	3.61999	40.4368	2.03e-10	1.04e-08
ENSG00000197081	IGF2R	0.36563	7.99157	40.3825	2.09e-10	1.07e-08
ENSG00000087494	PTHLH	-1.1407	2.04375	40.3651	2.11e-10	1.08e-08
ENSG00000133773	CCDC59	0.440156	5.85733	40.3519	2.12e-10	1.08e-08
ENSG00000113645	WWC1	0.40049	6.70181	40.2978	2.18e-10	1.11e-08
ENSG00000163348	PYGO2	0.43656	5.91177	40.2274	2.26e-10	1.15e-08
ENSG00000153162	BMP6	0.448233	5.67045	40.2201	2.27e-10	1.16e-08
ENSG00000175224	ATG13	0.406564	6.54964	40.1161	2.4e-10	1.22e-08
ENSG00000170043	TRAPPC1	-0.493993	5.17994	40.0975	2.42e-10	1.23e-08
ENSG00000060566	CREB3L3	-0.955927	2.65789	40.0878	2.43e-10	1.23e-08
ENSG00000076641	PAG1	0.650257	4.00999	40.0459	2.48e-10	1.26e-08
ENSG00000126226	PCID2	0.425249	6.13386	39.9581	2.6e-10	1.32e-08
ENSG00000011275	RNF216	0.423386	6.14569	39.9049	2.67e-10	1.35e-08
ENSG00000168610	STAT3	0.381527	7.26759	39.8458	2.75e-10	1.39e-08
ENSG00000174669	SLC29A2	-0.507264	4.97379	39.8497	2.75e-10	1.39e-08
ENSG00000198911	SREBF2	-0.378597	7.37886	39.8254	2.78e-10	1.4e-08
ENSG00000137693	YAP1	0.370728	7.66134	39.8116	2.8e-10	1.41e-08
ENSG00000177383	MAGEF1	0.532217	4.76321	39.783	2.84e-10	1.43e-08
ENSG00000143507	DUSP10	0.645071	4.01977	39.7677	2.86e-10	1.44e-08
ENSG00000120063	GNA13	0.398994	6.68664	39.7179	2.94e-10	1.48e-08
ENSG00000185924	RTN4RL1	-1.37682	1.56859	39.6992	2.97e-10	1.49e-08
ENSG00000171621	SPSB1	0.585809	4.33123	39.6194	3.09e-10	1.55e-08
ENSG00000174579	MSL2	0.459384	5.50166	39.581	3.15e-10	1.58e-08
ENSG00000213694	S1PR3	-0.619447	4.09493	39.5822	3.15e-10	1.58e-08
ENSG00000117632	STMN1	-0.357021	8.23942	39.5653	3.18e-10	1.59e-08
ENSG00000125826	RBCK1	0.480712	5.22419	39.5185	3.25e-10	1.63e-08
ENSG00000181744	C3orf58	-0.567711	4.50011	39.5021	3.28e-10	1.64e-08
ENSG00000168710	AHCYL1	0.360201	8.0599	39.4901	3.3e-10	1.65e-08
ENSG00000072422	RHOBTB1	-0.545402	4.6197	39.4669	3.34e-10	1.67e-08
ENSG00000158793	NIT1	0.550392	4.56509	39.4631	3.35e-10	1.67e-08
ENSG00000162607	USP1	0.352825	8.37922	39.4585	3.36e-10	1.67e-08
ENSG00000235109	ZSCAN31	-0.746831	3.45926	39.3273	3.59e-10	1.79e-08
ENSG00000104611	SH2D4A	0.390215	6.83215	39.3184	3.6e-10	1.79e-08
ENSG00000166510	CCDC68	0.694902	3.59945	39.1086	4.01e-10	1.99e-08
ENSG00000119844	AFTPH	0.441895	5.69394	39.0887	4.05e-10	2.01e-08
ENSG00000137965	IFI44	-0.813173	3.13699	39.059	4.12e-10	2.04e-08
ENSG00000121749	TBC1D15	0.405287	6.43881	39.0359	4.17e-10	2.07e-08
ENSG00000198830	HMGN2	-0.367964	7.66877	38.9816	4.28e-10	2.12e-08
ENSG00000183684	ALYREF	-0.399588	6.613	38.9758	4.3e-10	2.13e-08
ENSG00000244161	FLNB-AS1	1.47241	1.10507	38.97	4.31e-10	2.13e-08
ENSG00000169136	ATF5	-0.618435	4.14077	38.9563	4.34e-10	2.14e-08
ENSG00000165272	AQP3	-0.469461	5.34609	38.953	4.35e-10	2.15e-08
ENSG00000157800	SLC37A3	0.458334	5.45877	38.8831	4.5e-10	2.22e-08
ENSG00000075651	PLD1	0.548945	4.53902	38.8809	4.51e-10	2.22e-08
ENSG00000115998	C2orf42	0.700416	3.66893	38.8792	4.51e-10	2.22e-08
ENSG00000196422	PPP1R26	0.459577	5.4012	38.8262	4.64e-10	2.28e-08
ENSG00000170961	HAS2	0.77484	3.19791	38.7856	4.74e-10	2.33e-08
ENSG00000065491	TBC1D22B	0.618163	4.07707	38.7788	4.75e-10	2.33e-08
ENSG00000105321	CCDC9	0.549944	4.53224	38.7244	4.89e-10	2.4e-08
ENSG00000100528	CNIH1	0.407059	6.35592	38.7024	4.94e-10	2.42e-08
ENSG00000141720	PIP4K2B	-0.414474	6.16786	38.614	5.17e-10	2.53e-08
ENSG00000113391	FAM172A	-0.575502	4.39891	38.5787	5.27e-10	2.58e-08
ENSG00000197409	HIST1H3D	1.22917	1.81162	38.575	5.27e-10	2.58e-08
ENSG00000147400	CETN2	-0.435552	5.79892	38.5438	5.36e-10	2.62e-08
ENSG00000132600	PRMT7	-0.481908	5.1987	38.4236	5.7e-10	2.78e-08
ENSG00000160221	C21orf33	-0.432475	5.84076	38.3891	5.8e-10	2.83e-08
ENSG00000120696	KBTBD7	-0.73917	3.44982	38.387	5.81e-10	2.83e-08
ENSG00000132024	CC2D1A	0.496107	4.966	38.3451	5.93e-10	2.89e-08
ENSG00000151233	GXYLT1	-0.445202	5.62566	38.3447	5.94e-10	2.89e-08
ENSG00000077684	JADE1	0.417704	6.0813	38.3399	5.95e-10	2.89e-08
ENSG00000223477	LINC00842	-0.640696	3.84148	38.3152	6.03e-10	2.93e-08
ENSG00000178878	APOLD1	0.743634	3.36309	38.3121	6.04e-10	2.93e-08
ENSG00000267432	RP11-559N14.5	0.671201	3.70152	38.2916	6.1e-10	2.96e-08
ENSG00000101442	ACTR5	-0.573563	4.35848	38.2204	6.33e-10	3.06e-08
ENSG00000139629	GALNT6	-0.60474	4.15375	38.2206	6.33e-10	3.06e-08
ENSG00000233822	HIST1H2BN	0.684977	3.64921	38.1053	6.71e-10	3.25e-08
ENSG00000058668	ATP2B4	-0.395444	6.5351	38.0948	6.75e-10	3.26e-08
ENSG00000268575	RP1-283E3.8	1.31757	1.53905	38.0197	7.01e-10	3.39e-08
ENSG00000152795	HNRNPDL	-0.350353	8.20599	37.9734	7.18e-10	3.46e-08
ENSG00000142227	EMP3	-0.417519	6.05659	37.9436	7.29e-10	3.51e-08
ENSG00000126945	HNRNPH2	-0.381465	7.00939	37.9316	7.33e-10	3.53e-08
ENSG00000181924	COA4	-0.429044	5.85798	37.9031	7.44e-10	3.58e-08
ENSG00000232759	AC002480.3	1.3077	1.48135	37.8887	7.5e-10	3.61e-08
ENSG00000079215	SLC1A3	0.390581	6.62254	37.8865	7.51e-10	3.61e-08
ENSG00000197375	SLC22A5	0.387669	6.74667	37.8678	7.58e-10	3.64e-08
ENSG00000127947	PTPN12	0.377611	7.0105	37.8626	7.6e-10	3.65e-08
ENSG00000092964	DPYSL2	0.36936	7.30974	37.8359	7.7e-10	3.69e-08
ENSG00000117593	DARS2	-0.386593	6.77699	37.8363	7.7e-10	3.69e-08
ENSG00000132334	PTPRE	0.565305	4.33577	37.7446	8.07e-10	3.86e-08
ENSG00000172379	ARNT2	0.742398	3.31402	37.7208	8.17e-10	3.91e-08
ENSG00000184863	RBM33	0.394253	6.53319	37.7113	8.21e-10	3.92e-08
ENSG00000137449	CPEB2	0.585628	4.27596	37.7046	8.24e-10	3.93e-08
ENSG00000254685	FPGT	-0.576331	4.34153	37.6941	8.28e-10	3.95e-08
ENSG00000143401	ANP32E	-0.34291	8.49079	37.6757	8.36e-10	3.99e-08
ENSG00000261556	RP11-296I10.6	0.795727	3.15663	37.6728	8.38e-10	3.99e-08
ENSG00000196455	PIK3R4	-0.412712	6.1381	37.6538	8.46e-10	4.02e-08
ENSG00000176407	KCMF1	0.39787	6.41977	37.5663	8.85e-10	4.21e-08
ENSG00000196839	ADA	-0.720452	3.56616	37.5386	8.97e-10	4.26e-08
ENSG00000186834	HEXIM1	-0.437653	5.64068	37.5353	8.99e-10	4.27e-08
ENSG00000013619	MAMLD1	0.45596	5.35063	37.4939	9.18e-10	4.35e-08
ENSG00000140563	MCTP2	0.812877	2.98711	37.4107	9.58e-10	4.54e-08
ENSG00000233137	RP11-220I1.1	0.410863	6.10191	37.3938	9.66e-10	4.58e-08
ENSG00000157240	FZD1	-0.978993	2.50646	37.3248	1e-09	4.74e-08
ENSG00000072864	NDE1	0.436636	5.59874	37.281	1.02e-09	4.84e-08
ENSG00000174370	C11orf45	-1.34319	1.5168	37.267	1.03e-09	4.87e-08
ENSG00000261888	AC144831.1	0.749602	3.40962	37.2648	1.03e-09	4.87e-08
ENSG00000259758	CASC7	0.374432	7.06275	37.2242	1.05e-09	4.97e-08
ENSG00000055483	USP36	0.391651	6.58917	37.2195	1.06e-09	4.98e-08
ENSG00000137404	NRM	-0.48102	5.09094	37.2184	1.06e-09	4.98e-08
ENSG00000171798	KNDC1	2.99509	-0.53977	37.1647	1.09e-09	5.11e-08
ENSG00000136986	DERL1	0.412359	6.05863	37.0399	1.16e-09	5.45e-08
ENSG00000105854	PON2	-0.348754	8.06231	37.0248	1.17e-09	5.48e-08
ENSG00000161888	SPC24	-0.506106	4.87319	37.0158	1.17e-09	5.5e-08
ENSG00000134333	LDHA	-0.292631	11.1077	37.0025	1.18e-09	5.54e-08
ENSG00000198420	FAM115A	-0.483803	5.06803	36.9638	1.2e-09	5.64e-08
ENSG00000143545	RAB13	-0.437921	5.61135	36.8907	1.25e-09	5.85e-08
ENSG00000076067	RBMS2	0.4633	5.15417	36.8476	1.28e-09	5.98e-08
ENSG00000168077	SCARA3	-0.396185	6.36745	36.8244	1.29e-09	6.05e-08
ENSG00000181625	SLX1B	-2.46896	-0.204453	36.7889	1.32e-09	6.15e-08
ENSG00000148120	C9orf3	-0.584769	4.18362	36.7693	1.33e-09	6.21e-08
ENSG00000127824	TUBA4A	-0.352432	7.86684	36.7373	1.35e-09	6.31e-08
ENSG00000125875	TBC1D20	0.46453	5.27082	36.6742	1.4e-09	6.51e-08
ENSG00000166881	TMEM194A	0.376921	6.88517	36.6297	1.43e-09	6.65e-08
ENSG00000185298	CCDC137	-0.44885	5.46036	36.6274	1.43e-09	6.65e-08
ENSG00000230439	RP11-488P3.1	0.746282	3.15263	36.6326	1.43e-09	6.65e-08
ENSG00000135776	ABCB10	-0.454386	5.33623	36.6019	1.45e-09	6.74e-08
ENSG00000151746	BICD1	0.421479	5.8188	36.5628	1.48e-09	6.87e-08
ENSG00000180758	GPR157	0.54443	4.47476	36.5015	1.53e-09	7.08e-08
ENSG00000165704	HPRT1	-0.375074	6.94595	36.47	1.55e-09	7.19e-08
ENSG00000104856	RELB	0.814271	3.02537	36.3969	1.61e-09	7.46e-08
ENSG00000204178	TMEM57	0.450663	5.31991	36.3143	1.68e-09	7.77e-08
ENSG00000184207	PGP	-0.451408	5.37145	36.3077	1.69e-09	7.79e-08
ENSG00000103249	CLCN7	0.393621	6.40066	36.2852	1.71e-09	7.88e-08
ENSG00000166822	TMEM170A	0.475396	5.10746	36.2687	1.72e-09	7.94e-08
ENSG00000147454	SLC25A37	0.407326	6.02266	36.2454	1.74e-09	8.03e-08
ENSG00000259781	RP11-673C5.1	-0.401495	6.21956	36.2401	1.75e-09	8.04e-08
ENSG00000124767	GLO1	-0.351078	7.79922	36.1903	1.79e-09	8.25e-08
ENSG00000155903	RASA2	0.517915	4.6467	36.1763	1.8e-09	8.3e-08
ENSG00000112759	SLC29A1	-0.395596	6.29842	36.1672	1.81e-09	8.32e-08
ENSG00000170312	CDK1	-0.360302	7.42331	36.1682	1.81e-09	8.32e-08
ENSG00000135362	PRR5L	0.438229	5.48784	36.1485	1.83e-09	8.39e-08
ENSG00000165688	PMPCA	-0.383819	6.63206	36.148	1.83e-09	8.39e-08
ENSG00000139620	KANSL2	0.405505	6.10085	36.1082	1.87e-09	8.56e-08
ENSG00000268621	AC006262.5	0.48802	5.11722	36.0946	1.88e-09	8.61e-08
ENSG00000106052	TAX1BP1	0.368872	7.03361	36.0327	1.94e-09	8.88e-08
ENSG00000168874	ATOH8	-0.560561	4.35812	36.0169	1.96e-09	8.95e-08
ENSG00000132824	SERINC3	0.352106	7.68696	35.985	1.99e-09	9.09e-08
ENSG00000173530	TNFRSF10D	-0.652153	3.80464	35.9815	1.99e-09	9.1e-08
ENSG00000242485	MRPL20	-0.383749	6.59106	35.8578	2.12e-09	9.69e-08
ENSG00000109099	PMP22	0.408175	6.02558	35.8474	2.14e-09	9.73e-08
ENSG00000184900	SUMO3	-0.368021	7.06431	35.8201	2.17e-09	9.86e-08
ENSG00000188786	MTF1	0.428976	5.62416	35.8138	2.17e-09	9.88e-08
ENSG00000140265	ZSCAN29	0.459997	5.21862	35.7829	2.21e-09	1e-07
ENSG00000150593	PDCD4	0.39586	6.24197	35.7541	2.24e-09	1.02e-07
ENSG00000169715	MT1E	0.364523	7.13383	35.7114	2.29e-09	1.04e-07
ENSG00000112541	PDE10A	0.422018	5.68424	35.6823	2.32e-09	1.05e-07
ENSG00000073792	IGF2BP2	0.46677	5.06118	35.6751	2.33e-09	1.06e-07
ENSG00000177425	PAWR	0.36517	7.09746	35.6706	2.34e-09	1.06e-07
ENSG00000114378	HYAL1	-0.682023	3.52131	35.6588	2.35e-09	1.06e-07
ENSG00000136770	DNAJC1	0.455715	5.26409	35.6271	2.39e-09	1.08e-07
ENSG00000151881	C5orf28	0.424141	5.65335	35.6306	2.39e-09	1.08e-07
ENSG00000130821	SLC6A8	-0.420421	5.78289	35.5648	2.47e-09	1.11e-07
ENSG00000166689	PLEKHA7	0.409785	5.9382	35.56	2.48e-09	1.12e-07
ENSG00000180357	ZNF609	0.385756	6.4147	35.4834	2.57e-09	1.16e-07
ENSG00000089737	DDX24	-0.343523	7.98463	35.4644	2.6e-09	1.17e-07
ENSG00000130338	TULP4	0.445617	5.37611	35.4302	2.65e-09	1.19e-07
ENSG00000183323	CCDC125	-0.539793	4.46123	35.4093	2.67e-09	1.2e-07
ENSG00000179715	PCED1B	0.610967	3.89531	35.3846	2.71e-09	1.22e-07
ENSG00000212747	FAM127C	-0.456484	5.23755	35.3825	2.71e-09	1.22e-07
ENSG00000115806	GORASP2	0.386655	6.42179	35.3748	2.72e-09	1.22e-07
ENSG00000147174	ACRC	0.948256	2.36125	35.3339	2.78e-09	1.25e-07
ENSG00000131791	PRKAB2	0.479368	4.94183	35.27	2.87e-09	1.29e-07
ENSG00000145431	PDGFC	0.449745	5.22697	35.2574	2.89e-09	1.29e-07
ENSG00000196247	ZNF107	-0.58351	4.16506	35.2605	2.89e-09	1.29e-07
ENSG00000138399	FASTKD1	-0.497558	4.80189	35.1943	2.99e-09	1.33e-07
ENSG00000085719	CPNE3	-0.363633	7.08801	35.171	3.02e-09	1.35e-07
ENSG00000198355	PIM3	0.41422	5.95483	35.081	3.17e-09	1.41e-07
ENSG00000117519	CNN3	-0.372762	6.7455	35.0581	3.2e-09	1.43e-07
ENSG00000113580	NR3C1	0.338359	8.08006	35.0383	3.24e-09	1.44e-07
ENSG00000137494	ANKRD42	0.535561	4.45886	35.0372	3.24e-09	1.44e-07
ENSG00000255112	CHMP1B	0.444685	5.33829	35.0169	3.27e-09	1.46e-07
ENSG00000249328	RP11-26J3.1	1.54579	0.956175	34.9881	3.32e-09	1.48e-07
ENSG00000113790	EHHADH	-0.822782	2.88906	34.9525	3.38e-09	1.5e-07
ENSG00000160199	PKNOX1	-0.5377	4.51749	34.9423	3.4e-09	1.51e-07
ENSG00000204387	C6orf48	0.386307	6.42759	34.9168	3.44e-09	1.53e-07
ENSG00000223573	TINCR	-0.728789	3.38965	34.8848	3.5e-09	1.55e-07
ENSG00000073350	LLGL2	-0.588735	4.04495	34.8407	3.58e-09	1.58e-07
ENSG00000140526	ABHD2	0.380708	6.45003	34.8415	3.58e-09	1.58e-07
ENSG00000141034	GID4	0.5305	4.46735	34.8238	3.61e-09	1.6e-07
ENSG00000196233	LCOR	0.47067	5.03107	34.7721	3.71e-09	1.64e-07
ENSG00000163516	ANKZF1	0.409944	5.81099	34.7516	3.75e-09	1.65e-07
ENSG00000101367	MAPRE1	-0.337912	8.07103	34.7416	3.77e-09	1.66e-07
ENSG00000135930	EIF4E2	-0.424775	5.60738	34.7135	3.82e-09	1.68e-07
ENSG00000119508	NR4A3	0.518385	4.72253	34.7103	3.83e-09	1.69e-07
ENSG00000102317	RBM3	-0.338867	8.02414	34.6988	3.85e-09	1.69e-07
ENSG00000238266	LINC00707	0.505946	4.65307	34.6707	3.91e-09	1.72e-07
ENSG00000188505	NCCRP1	-0.325428	8.68151	34.6609	3.93e-09	1.73e-07
ENSG00000088035	ALG6	-0.628576	3.8493	34.6401	3.97e-09	1.74e-07
ENSG00000113240	CLK4	0.505111	4.69788	34.6387	3.97e-09	1.74e-07
ENSG00000172469	MANEA	-0.456106	5.19176	34.6343	3.98e-09	1.75e-07
ENSG00000140262	TCF12	0.362424	6.98783	34.6192	4.01e-09	1.76e-07
ENSG00000173334	TRIB1	0.669902	3.50728	34.5446	4.17e-09	1.82e-07
ENSG00000178860	MSC	0.541194	4.3094	34.5417	4.18e-09	1.83e-07
ENSG00000092841	MYL6	-0.319571	8.94839	34.5112	4.24e-09	1.85e-07
ENSG00000124541	RRP36	-0.400623	5.98645	34.4839	4.3e-09	1.88e-07
ENSG00000165502	RPL36AL	-0.413746	5.75749	34.4564	4.36e-09	1.9e-07
ENSG00000131711	MAP1B	0.424438	5.44529	34.4221	4.44e-09	1.94e-07
ENSG00000253276	CCDC71L	0.980314	2.33099	34.3657	4.57e-09	1.99e-07
ENSG00000273301	RP11-314B1.2	0.479336	4.84199	34.3325	4.65e-09	2.02e-07
ENSG00000166902	MRPL16	-0.398031	6.03831	34.3302	4.66e-09	2.03e-07
ENSG00000139329	LUM	-0.404981	5.8178	34.3034	4.72e-09	2.05e-07
ENSG00000125170	DOK4	-0.475351	4.92142	34.2902	4.75e-09	2.06e-07
ENSG00000138018	EPT1	0.362813	6.93442	34.2859	4.76e-09	2.07e-07
ENSG00000087087	SRRT	-0.356366	7.18386	34.2412	4.87e-09	2.11e-07
ENSG00000172831	CES2	-0.415216	5.7317	34.2055	4.96e-09	2.15e-07
ENSG00000131475	VPS25	-0.39786	6.06527	34.2018	4.97e-09	2.15e-07
ENSG00000090621	PABPC4	-0.329778	8.35103	34.1907	5e-09	2.16e-07
ENSG00000197381	ADARB1	0.409835	5.73367	34.1559	5.09e-09	2.2e-07
ENSG00000152503	TRIM36	0.631912	3.71048	34.1497	5.11e-09	2.21e-07
ENSG00000163611	SPICE1	0.450814	5.18803	34.0601	5.35e-09	2.31e-07
ENSG00000150165	ANXA8L1	-0.810518	2.88737	34.0273	5.44e-09	2.35e-07
ENSG00000165219	GAPVD1	0.349233	7.38976	33.9838	5.56e-09	2.4e-07
ENSG00000116133	DHCR24	-0.331968	8.13738	33.9183	5.75e-09	2.48e-07
ENSG00000131023	LATS1	0.383933	6.27712	33.9021	5.8e-09	2.5e-07
ENSG00000057149	SERPINB3	-0.723451	3.15239	33.8613	5.92e-09	2.55e-07
ENSG00000099204	ABLIM1	0.370264	6.57998	33.8639	5.92e-09	2.54e-07
ENSG00000114120	SLC25A36	0.364464	6.79553	33.851	5.95e-09	2.56e-07
ENSG00000108592	FTSJ3	-0.353876	7.21686	33.8474	5.97e-09	2.56e-07
ENSG00000160813	PPP1R35	0.681111	3.41096	33.7926	6.14e-09	2.63e-07
ENSG00000158882	TOMM40L	-0.511944	4.55418	33.7858	6.16e-09	2.64e-07
ENSG00000197714	ZNF460	0.98471	2.27226	33.7338	6.32e-09	2.71e-07
ENSG00000166741	NNMT	0.344085	7.53312	33.6872	6.48e-09	2.77e-07
ENSG00000118197	DDX59	0.445714	5.21579	33.6703	6.53e-09	2.79e-07
ENSG00000223784	RP11-554I8.2	0.843762	2.6586	33.6674	6.54e-09	2.8e-07
ENSG00000138336	TET1	-1.5656	0.862305	33.6628	6.56e-09	2.8e-07
ENSG00000241258	CRCP	0.461542	5.04626	33.6605	6.57e-09	2.8e-07
ENSG00000124222	STX16	0.376532	6.44862	33.641	6.63e-09	2.83e-07
ENSG00000150054	MPP7	0.487088	4.71095	33.6121	6.73e-09	2.87e-07
ENSG00000101347	SAMHD1	-0.42856	5.41723	33.6082	6.75e-09	2.87e-07
ENSG00000128585	MKLN1	0.369233	6.57304	33.5793	6.85e-09	2.91e-07
ENSG00000231607	DLEU2	-0.712918	3.33113	33.5676	6.89e-09	2.93e-07
ENSG00000267374	LINC00669	0.673135	3.45814	33.554	6.94e-09	2.95e-07
ENSG00000198556	ZNF789	-0.611022	3.9061	33.5473	6.96e-09	2.96e-07
ENSG00000128011	LRFN1	-1.06475	1.96892	33.5321	7.02e-09	2.98e-07
ENSG00000081760	AACS	-0.388549	6.13628	33.522	7.05e-09	2.99e-07
ENSG00000144802	NFKBIZ	0.706806	3.34731	33.4266	7.41e-09	3.14e-07
ENSG00000204147	ASAH2B	0.648223	3.5911	33.3683	7.63e-09	3.23e-07
ENSG00000257671	RP3-416H24.1	0.53881	4.24479	33.369	7.63e-09	3.23e-07
ENSG00000001630	CYP51A1	-0.70252	3.31388	33.3575	7.67e-09	3.24e-07
ENSG00000189159	HN1	-0.375277	6.46888	33.335	7.76e-09	3.28e-07
ENSG00000127511	SIN3B	0.380893	6.26658	33.3316	7.78e-09	3.28e-07
ENSG00000100439	ABHD4	0.642644	3.65969	33.3286	7.79e-09	3.29e-07
ENSG00000254667	AP000783.1	0.732111	3.11559	33.2982	7.91e-09	3.33e-07
ENSG00000101782	RIOK3	0.392443	6.00792	33.2693	8.03e-09	3.38e-07
ENSG00000206530	WDR52	-0.579081	4.01834	33.2646	8.05e-09	3.39e-07
ENSG00000170004	CHD3	-0.34213	7.51513	33.1905	8.36e-09	3.52e-07
ENSG00000148218	ALAD	-0.471909	4.94346	33.1846	8.39e-09	3.52e-07
ENSG00000066279	ASPM	-0.342569	7.47258	33.1758	8.43e-09	3.54e-07
ENSG00000112033	PPARD	0.453704	5.07278	33.1618	8.49e-09	3.56e-07
ENSG00000130592	LSP1	-1.0711	1.82549	33.1382	8.59e-09	3.6e-07
ENSG00000129353	SLC44A2	-0.351587	7.12536	33.1123	8.71e-09	3.65e-07
ENSG00000100503	NIN	-0.378399	6.28997	33.0464	9.01e-09	3.77e-07
ENSG00000179833	SERTAD2	0.508866	4.60018	33.0215	9.12e-09	3.82e-07
ENSG00000117289	TXNIP	0.361043	6.84639	33.0171	9.14e-09	3.82e-07
ENSG00000144381	HSPD1	-0.292552	10.1118	33.0044	9.2e-09	3.84e-07
ENSG00000165572	KBTBD6	-0.454833	5.09576	32.9739	9.35e-09	3.9e-07
ENSG00000188313	PLSCR1	0.476047	4.82434	32.9519	9.45e-09	3.94e-07
ENSG00000113356	POLR3G	-0.421706	5.48633	32.9475	9.48e-09	3.95e-07
ENSG00000055208	TAB2	0.355926	6.88259	32.8761	9.83e-09	4.1e-07
ENSG00000179583	CIITA	1.1038	1.78794	32.8152	1.01e-08	4.22e-07
ENSG00000225313	RP11-415J8.3	1.64345	0.642202	32.6679	1.09e-08	4.55e-07
ENSG00000123146	CD97	0.350342	7.04687	32.6452	1.11e-08	4.6e-07
ENSG00000149792	MRPL49	-0.378466	6.27342	32.5961	1.14e-08	4.72e-07
ENSG00000146802	TMEM168	-0.497482	4.63527	32.5275	1.18e-08	4.88e-07
ENSG00000071054	MAP4K4	-0.358931	6.7485	32.4899	1.2e-08	4.97e-07
ENSG00000113368	LMNB1	-0.328136	7.9968	32.4578	1.22e-08	5.05e-07
ENSG00000181472	ZBTB2	0.435846	5.2013	32.4159	1.25e-08	5.16e-07
ENSG00000198855	FICD	0.812348	2.93885	32.4103	1.25e-08	5.17e-07
ENSG00000163320	CGGBP1	0.359086	6.69715	32.3918	1.26e-08	5.21e-07
ENSG00000164211	STARD4	-0.393388	5.98507	32.3989	1.26e-08	5.2e-07
ENSG00000144468	RHBDD1	0.523629	4.36107	32.333	1.3e-08	5.37e-07
ENSG00000116809	ZBTB17	0.52177	4.39249	32.2992	1.32e-08	5.45e-07
ENSG00000118246	FASTKD2	-0.409688	5.59433	32.2999	1.32e-08	5.45e-07
ENSG00000186591	UBE2H	0.352631	6.90063	32.3103	1.32e-08	5.43e-07
ENSG00000210196	MT-TP	-0.345601	7.20692	32.2779	1.34e-08	5.51e-07
ENSG00000184992	BRI3BP	-0.360353	6.67126	32.1792	1.41e-08	5.79e-07
ENSG00000205336	GPR56	0.349613	7.03306	32.173	1.41e-08	5.8e-07
ENSG00000022267	FHL1	0.348978	7.01889	32.1555	1.42e-08	5.85e-07
ENSG00000263731	RP11-498C9.15	-1.05721	2.08958	32.1581	1.42e-08	5.85e-07
ENSG00000123200	ZC3H13	-0.353769	6.88655	32.1493	1.43e-08	5.86e-07
ENSG00000116704	SLC35D1	-0.437457	5.21124	32.1144	1.45e-08	5.97e-07
ENSG00000143702	CEP170	0.33951	7.35364	32.1051	1.46e-08	5.99e-07
ENSG00000105011	ASF1B	-0.37482	6.28901	32.0892	1.47e-08	6.03e-07
ENSG00000106003	LFNG	-0.721116	3.16618	32.0952	1.47e-08	6.02e-07
ENSG00000116406	EDEM3	-0.369977	6.40103	32.0596	1.5e-08	6.12e-07
ENSG00000175305	CCNE2	-0.426751	5.34204	32.0335	1.52e-08	6.2e-07
ENSG00000123094	RASSF8	0.376331	6.17038	32.018	1.53e-08	6.24e-07
ENSG00000138160	KIF11	-0.332718	7.68441	32.0103	1.53e-08	6.26e-07
ENSG00000135148	TRAFD1	-0.381798	6.09746	32.0098	1.54e-08	6.26e-07
ENSG00000132680	KIAA0907	0.373655	6.28548	31.9655	1.57e-08	6.4e-07
ENSG00000132793	LPIN3	-0.63157	3.64777	31.9387	1.59e-08	6.48e-07
ENSG00000147065	MSN	-0.296302	9.58367	31.9361	1.59e-08	6.49e-07
ENSG00000135999	EPC2	0.432321	5.20727	31.8742	1.65e-08	6.69e-07
ENSG00000172493	AFF1	0.371163	6.30465	31.8686	1.65e-08	6.71e-07
ENSG00000237441	RGL2	0.524352	4.3099	31.8565	1.66e-08	6.75e-07
ENSG00000230438	RP11-420G6.4	0.817151	2.64412	31.8212	1.69e-08	6.86e-07
ENSG00000144959	NCEH1	0.413342	5.47583	31.8141	1.7e-08	6.88e-07
ENSG00000145919	BOD1	0.376689	6.17957	31.8003	1.71e-08	6.93e-07
ENSG00000116922	C1orf109	0.393594	5.77666	31.7669	1.74e-08	7.04e-07
ENSG00000124160	NCOA5	-0.383358	6.01729	31.7691	1.74e-08	7.04e-07
ENSG00000092758	COL9A3	-0.653097	3.4437	31.7438	1.76e-08	7.12e-07
ENSG00000048540	LMO3	-0.598666	3.80152	31.7325	1.77e-08	7.16e-07
ENSG00000167528	ZNF641	0.622337	3.64144	31.7211	1.78e-08	7.19e-07
ENSG00000179862	CITED4	0.749943	2.98796	31.713	1.79e-08	7.22e-07
ENSG00000138593	SECISBP2L	0.37836	6.04485	31.5616	1.93e-08	7.8e-07
ENSG00000121390	PSPC1	-0.384755	5.96379	31.5527	1.94e-08	7.83e-07
ENSG00000127241	MASP1	2.58617	-0.491647	31.5426	1.95e-08	7.86e-07
ENSG00000078668	VDAC3	-0.370291	6.29765	31.5295	1.97e-08	7.91e-07
ENSG00000096433	ITPR3	0.324589	7.89821	31.5299	1.97e-08	7.91e-07
ENSG00000154040	CABYR	-0.701108	3.24525	31.5142	1.98e-08	7.96e-07
ENSG00000183283	DAZAP2	-0.33518	7.45111	31.5134	1.98e-08	7.96e-07
ENSG00000123136	DDX39A	-0.371794	6.29787	31.4918	2e-08	8.03e-07
ENSG00000134668	SPOCD1	-1.2592	1.39562	31.4935	2e-08	8.03e-07
ENSG00000197102	DYNC1H1	0.298098	9.34311	31.5005	2e-08	8.01e-07
ENSG00000031003	FAM13B	0.375689	6.09579	31.4795	2.02e-08	8.08e-07
ENSG00000047365	ARAP2	0.703254	3.18642	31.4772	2.02e-08	8.08e-07
ENSG00000057294	PKP2	0.630124	3.50209	31.4144	2.09e-08	8.34e-07
ENSG00000157470	FAM81A	-0.479156	4.68435	31.3553	2.15e-08	8.59e-07
ENSG00000130921	C12orf65	0.40983	5.46929	31.3501	2.16e-08	8.61e-07
ENSG00000086712	TXLNG	0.351117	6.76145	31.2985	2.21e-08	8.84e-07
ENSG00000111801	BTN3A3	-0.561364	4.02399	31.2932	2.22e-08	8.85e-07
ENSG00000107854	TNKS2	0.346702	6.91423	31.2342	2.29e-08	9.12e-07
ENSG00000106211	HSPB1	-0.327578	7.73617	31.1965	2.33e-08	9.29e-07
ENSG00000101574	METTL4	0.528746	4.20201	31.178	2.36e-08	9.38e-07
ENSG00000222009	BTBD19	1.0334	1.86433	31.0674	2.49e-08	9.92e-07
ENSG00000068654	POLR1A	-0.3409	7.12015	31.0133	2.56e-08	1.02e-06
ENSG00000198730	CTR9	-0.35139	6.74014	31.0086	2.57e-08	1.02e-06
ENSG00000169583	CLIC3	-0.688513	3.23016	31.0045	2.58e-08	1.02e-06
ENSG00000153443	UBALD1	0.421153	5.26644	30.9868	2.6e-08	1.03e-06
ENSG00000081721	DUSP12	0.410938	5.43361	30.9762	2.61e-08	1.04e-06
ENSG00000125247	TMTC4	-0.660011	3.42064	30.9569	2.64e-08	1.05e-06
ENSG00000132646	PCNA	-0.322639	7.89113	30.9124	2.7e-08	1.07e-06
ENSG00000120837	NFYB	-0.426609	5.2143	30.9064	2.71e-08	1.07e-06
ENSG00000116675	DNAJC6	0.40896	5.50933	30.8975	2.72e-08	1.08e-06
ENSG00000096717	SIRT1	0.372462	6.19592	30.895	2.73e-08	1.08e-06
ENSG00000162390	ACOT11	-1.12235	1.68746	30.8943	2.73e-08	1.08e-06
ENSG00000173039	RELA	0.36351	6.33738	30.8482	2.79e-08	1.1e-06
ENSG00000167656	LY6D	-0.634807	3.56172	30.8385	2.81e-08	1.11e-06
ENSG00000145016	KIAA0226	0.42936	5.17935	30.8249	2.83e-08	1.11e-06
ENSG00000082898	XPO1	-0.296302	9.27191	30.8174	2.84e-08	1.12e-06
ENSG00000126803	HSPA2	-2.06449	0.21533	30.8064	2.85e-08	1.12e-06
ENSG00000205572	SERF1B	1.09429	1.80154	30.7772	2.9e-08	1.14e-06
ENSG00000171346	KRT15	-0.836648	2.53668	30.7414	2.95e-08	1.16e-06
ENSG00000196436	NPIPB15	0.986485	2.13447	30.7133	2.99e-08	1.18e-06
ENSG00000153560	UBP1	-0.332332	7.39362	30.7006	3.01e-08	1.18e-06
ENSG00000136653	RASSF5	0.520071	4.2254	30.6576	3.08e-08	1.21e-06
ENSG00000072840	EVC	-0.644184	3.48421	30.6511	3.09e-08	1.21e-06
ENSG00000079332	SAR1A	0.326373	7.64026	30.6438	3.1e-08	1.21e-06
ENSG00000165124	SVEP1	0.357434	6.41957	30.6337	3.12e-08	1.22e-06
ENSG00000183475	ASB7	0.410335	5.41027	30.622	3.14e-08	1.23e-06
ENSG00000174485	DENND4A	0.404004	5.46227	30.5923	3.19e-08	1.24e-06
ENSG00000105173	CCNE1	-0.638998	3.5537	30.5672	3.23e-08	1.26e-06
ENSG00000107249	GLIS3	0.81038	2.63227	30.5323	3.29e-08	1.28e-06
ENSG00000150457	LATS2	0.395705	5.65156	30.5328	3.29e-08	1.28e-06
ENSG00000177138	FAM9B	0.928696	2.1382	30.5188	3.31e-08	1.29e-06
ENSG00000126500	FLRT1	1.805	0.308171	30.5062	3.33e-08	1.3e-06
ENSG00000196850	PPTC7	0.357279	6.48307	30.5039	3.33e-08	1.3e-06
ENSG00000149782	PLCB3	-0.349702	6.68019	30.4845	3.37e-08	1.31e-06
ENSG00000154447	SH3RF1	0.450132	4.89408	30.4729	3.39e-08	1.32e-06
ENSG00000148735	PLEKHS1	-1.41987	0.908361	30.461	3.41e-08	1.32e-06
ENSG00000112984	KIF20A	-0.319076	7.92562	30.4264	3.47e-08	1.35e-06
ENSG00000131171	SH3BGRL	-0.400274	5.52156	30.3813	3.55e-08	1.38e-06
ENSG00000029363	BCLAF1	-0.301899	8.82446	30.3703	3.57e-08	1.38e-06
ENSG00000135116	HRK	2.01707	0.27431	30.3441	3.62e-08	1.4e-06
ENSG00000178685	PARP10	-0.68109	3.28055	30.2871	3.73e-08	1.44e-06
ENSG00000159256	MORC3	0.39398	5.60793	30.2472	3.81e-08	1.47e-06
ENSG00000169992	NLGN2	-0.393031	5.62754	30.2474	3.81e-08	1.47e-06
ENSG00000108306	FBXL20	0.575137	3.86572	30.2305	3.84e-08	1.48e-06
ENSG00000173226	IQCB1	0.417177	5.28405	30.1923	3.92e-08	1.51e-06
ENSG00000171444	MCC	-0.685854	3.2655	30.1646	3.97e-08	1.53e-06
ENSG00000198668	CALM1	-0.3114	8.23916	30.1654	3.97e-08	1.53e-06
ENSG00000150938	CRIM1	0.314276	8.07506	30.1602	3.98e-08	1.53e-06
ENSG00000186111	PIP5K1C	-0.386235	5.76974	30.1496	4e-08	1.54e-06
ENSG00000117481	NSUN4	0.39893	5.533	30.1473	4.01e-08	1.54e-06
ENSG00000126001	CEP250	-0.371169	6.09666	30.1439	4.01e-08	1.54e-06
ENSG00000114867	EIF4G1	-0.284838	9.77254	30.1243	4.05e-08	1.56e-06
ENSG00000115884	SDC1	-0.370745	6.06313	30.1249	4.05e-08	1.56e-06
ENSG00000052850	ALX4	-0.489833	4.55957	30.1057	4.09e-08	1.57e-06
ENSG00000159214	CCDC24	0.980744	2.00145	30.0886	4.13e-08	1.58e-06
ENSG00000023330	ALAS1	0.390112	5.63618	30.0798	4.15e-08	1.59e-06
ENSG00000112200	ZNF451	0.35152	6.56146	30.0454	4.22e-08	1.62e-06
ENSG00000145901	TNIP1	0.3694	6.03707	30.0435	4.23e-08	1.62e-06
ENSG00000197912	SPG7	-0.361392	6.33962	30.0235	4.27e-08	1.63e-06
ENSG00000117528	ABCD3	-0.355178	6.44819	30.0215	4.28e-08	1.63e-06
ENSG00000128973	CLN6	-0.381469	5.86812	30.0099	4.3e-08	1.64e-06
ENSG00000130787	HIP1R	0.356574	6.39573	29.9935	4.34e-08	1.66e-06
ENSG00000170325	PRDM10	0.455662	4.76975	29.993	4.34e-08	1.66e-06
ENSG00000134470	IL15RA	0.704547	3.06494	29.9893	4.35e-08	1.66e-06
ENSG00000197343	ZNF655	0.372051	5.99871	29.9864	4.35e-08	1.66e-06
ENSG00000176273	SLC35G1	-0.517429	4.279	29.9823	4.36e-08	1.66e-06
ENSG00000149968	MMP3	1.82229	0.17629	29.9571	4.42e-08	1.68e-06
ENSG00000142599	RERE	0.364351	6.12597	29.9093	4.53e-08	1.72e-06
ENSG00000126351	THRA	-0.459719	4.74566	29.8729	4.62e-08	1.75e-06
ENSG00000250116	RP11-417F21.1	1.83296	0.396611	29.8703	4.62e-08	1.76e-06
ENSG00000136848	DAB2IP	-0.472669	4.61967	29.8519	4.67e-08	1.77e-06
ENSG00000196154	S100A4	-0.303374	8.58704	29.8403	4.69e-08	1.78e-06
ENSG00000211448	DIO2	-0.537162	4.05751	29.8383	4.7e-08	1.78e-06
ENSG00000160213	CSTB	-0.361116	6.2777	29.7986	4.8e-08	1.82e-06
ENSG00000147669	POLR2K	-0.365781	6.16099	29.7699	4.87e-08	1.84e-06
ENSG00000152104	PTPN14	0.341789	6.76811	29.759	4.9e-08	1.85e-06
ENSG00000108510	MED13	0.329573	7.25097	29.753	4.91e-08	1.86e-06
ENSG00000151929	BAG3	-0.369512	6.12447	29.7266	4.98e-08	1.88e-06
ENSG00000170852	KBTBD2	0.369012	6.06039	29.7221	4.99e-08	1.88e-06
ENSG00000258839	MC1R	0.650076	3.46252	29.714	5.01e-08	1.89e-06
ENSG00000034677	RNF19A	0.373216	5.94906	29.6977	5.05e-08	1.9e-06
ENSG00000132005	RFX1	0.551284	3.96841	29.6518	5.17e-08	1.95e-06
ENSG00000177463	NR2C2	0.401558	5.41062	29.6321	5.23e-08	1.97e-06
ENSG00000033170	FUT8	-0.449346	4.86052	29.6135	5.28e-08	1.98e-06
ENSG00000214223	HNRNPA1P10	-0.342978	6.7537	29.6139	5.28e-08	1.98e-06
ENSG00000162337	LRP5	-0.399656	5.45098	29.61	5.29e-08	1.99e-06
ENSG00000176473	WDR25	0.532254	4.15282	29.5953	5.33e-08	2e-06
ENSG00000010165	METTL13	-0.363831	6.19008	29.5511	5.45e-08	2.04e-06
ENSG00000160781	PAQR6	0.553049	4.00921	29.5513	5.45e-08	2.04e-06
ENSG00000164180	TMEM161B	0.42865	5.07493	29.5328	5.5e-08	2.06e-06
ENSG00000117906	RCN2	-0.321685	7.59499	29.5123	5.56e-08	2.08e-06
ENSG00000145214	DGKQ	0.756555	2.85067	29.501	5.59e-08	2.09e-06
ENSG00000148396	SEC16A	0.319517	7.65199	29.5005	5.59e-08	2.09e-06
ENSG00000118898	PPL	0.366703	5.98241	29.4994	5.6e-08	2.09e-06
ENSG00000226380	MIR29A	1.25571	1.35325	29.4872	5.63e-08	2.1e-06
ENSG00000108654	DDX5	-0.280564	9.83278	29.4235	5.82e-08	2.17e-06
ENSG00000108840	HDAC5	0.385209	5.63937	29.4026	5.88e-08	2.2e-06
ENSG00000145819	ARHGAP26	0.418072	5.15134	29.3917	5.92e-08	2.21e-06
ENSG00000182752	PAPPA	0.351639	6.37629	29.3511	6.04e-08	2.25e-06
ENSG00000198879	SFMBT2	0.383702	5.62716	29.3474	6.05e-08	2.25e-06
ENSG00000013364	MVP	-0.386115	5.63994	29.3094	6.17e-08	2.3e-06
ENSG00000074621	SLC24A1	-0.578676	3.81044	29.2915	6.23e-08	2.32e-06
ENSG00000164938	TP53INP1	-1.03749	1.80078	29.2918	6.23e-08	2.32e-06
ENSG00000124098	FAM210B	-0.480487	4.52603	29.2733	6.29e-08	2.34e-06
ENSG00000189339	SLC35E2B	0.411813	5.24869	29.2559	6.35e-08	2.36e-06
ENSG00000118482	PHF3	0.331296	7.04571	29.2427	6.39e-08	2.37e-06
ENSG00000181773	GPR3	1.01527	1.99617	29.2354	6.41e-08	2.38e-06
ENSG00000163510	CWC22	0.404522	5.32981	29.229	6.44e-08	2.38e-06
ENSG00000115839	RAB3GAP1	0.362111	6.10412	29.2095	6.5e-08	2.41e-06
ENSG00000116478	HDAC1	-0.338558	6.83019	29.2087	6.5e-08	2.41e-06
ENSG00000204634	TBC1D8	0.445835	4.83788	29.1852	6.58e-08	2.43e-06
ENSG00000254681	PKD1P5	0.967825	1.94995	29.1868	6.58e-08	2.43e-06
ENSG00000198720	ANKRD13B	-0.46457	4.69267	29.1706	6.63e-08	2.45e-06
ENSG00000189241	TSPYL1	-0.348782	6.53915	29.1415	6.73e-08	2.48e-06
ENSG00000196151	WDSUB1	0.769593	2.74804	29.1209	6.8e-08	2.51e-06
ENSG00000142235	LMTK3	-0.836572	2.52955	29.1174	6.82e-08	2.51e-06
ENSG00000107984	DKK1	-0.508281	4.28685	29.1143	6.83e-08	2.51e-06
ENSG00000162517	PEF1	-0.407898	5.32851	29.1015	6.87e-08	2.53e-06
ENSG00000172375	C2CD2L	0.546564	3.94183	29.0817	6.94e-08	2.55e-06
ENSG00000185499	MUC1	-0.374323	5.80447	29.0574	7.03e-08	2.58e-06
ENSG00000177380	PPFIA3	-0.619322	3.61911	29.0411	7.09e-08	2.61e-06
ENSG00000221955	SLC12A8	-0.744615	2.837	29.0372	7.1e-08	2.61e-06
ENSG00000075336	TIMM21	-0.424783	5.10079	28.9992	7.25e-08	2.66e-06
ENSG00000131795	RBM8A	-0.351143	6.40474	28.9821	7.31e-08	2.68e-06
ENSG00000090776	EFNB1	-0.720608	3.03437	28.967	7.37e-08	2.7e-06
ENSG00000155850	SLC26A2	0.324535	7.2899	28.9474	7.44e-08	2.73e-06
ENSG00000173230	GOLGB1	0.324084	7.28888	28.9421	7.46e-08	2.73e-06
ENSG00000149231	CCDC82	0.389712	5.51958	28.9337	7.49e-08	2.74e-06
ENSG00000137413	TAF8	0.453372	4.74766	28.9072	7.6e-08	2.78e-06
ENSG00000127954	STEAP4	-0.290687	9.02331	28.876	7.72e-08	2.82e-06
ENSG00000236824	BCYRN1	-0.937546	2.17557	28.8262	7.92e-08	2.89e-06
ENSG00000143398	PIP5K1A	0.312073	7.83725	28.819	7.95e-08	2.9e-06
ENSG00000147475	ERLIN2	-0.410258	5.27537	28.8194	7.95e-08	2.9e-06
ENSG00000164751	PEX2	-0.455502	4.75465	28.8157	7.97e-08	2.9e-06
ENSG00000238107	RP11-495P10.5	4.21282	-1.23672	28.8076	8e-08	2.91e-06
ENSG00000086758	HUWE1	0.288243	9.1432	28.8048	8.01e-08	2.92e-06
ENSG00000169299	PGM2	-0.388918	5.56218	28.7934	8.06e-08	2.93e-06
ENSG00000111639	MRPL51	-0.348018	6.47115	28.7719	8.15e-08	2.96e-06
ENSG00000135723	FHOD1	-0.374702	5.76434	28.7708	8.15e-08	2.96e-06
ENSG00000273237	CTB-119C2.1	1.04017	1.71932	28.7374	8.29e-08	3.01e-06
ENSG00000268218	AC137932.1	1.2726	1.2074	28.7351	8.3e-08	3.01e-06
ENSG00000070476	ZXDC	0.410078	5.22725	28.6671	8.6e-08	3.12e-06
ENSG00000130303	BST2	-0.320726	7.41699	28.6599	8.63e-08	3.13e-06
ENSG00000154518	ATP5G3	-0.350195	6.39635	28.6392	8.73e-08	3.16e-06
ENSG00000113594	LIFR	0.357562	6.11791	28.6325	8.76e-08	3.17e-06
ENSG00000214357	NEURL1B	-0.520332	4.08915	28.5732	9.03e-08	3.27e-06
ENSG00000021762	OSBPL5	-0.364413	5.96807	28.5684	9.05e-08	3.27e-06
ENSG00000043143	JADE2	-0.335237	6.77428	28.5607	9.09e-08	3.28e-06
ENSG00000132967	HMGB1P5	-0.337292	6.73435	28.5536	9.12e-08	3.29e-06
ENSG00000164823	OSGIN2	0.376076	5.72368	28.538	9.19e-08	3.32e-06
ENSG00000166797	FAM96A	-0.352251	6.31261	28.5019	9.37e-08	3.38e-06
ENSG00000132906	CASP9	0.40415	5.31553	28.5	9.38e-08	3.38e-06
ENSG00000142657	PGD	-0.326444	7.1348	28.4989	9.38e-08	3.38e-06
ENSG00000120833	SOCS2	0.533887	4.0533	28.4891	9.43e-08	3.39e-06
ENSG00000163697	APBB2	0.386934	5.48838	28.4785	9.48e-08	3.41e-06
ENSG00000197744	PTMAP2	-1.12525	1.56954	28.4763	9.49e-08	3.41e-06
ENSG00000004399	PLXND1	-0.3289	6.97565	28.4649	9.55e-08	3.43e-06
ENSG00000125912	NCLN	-0.323257	7.25477	28.4538	9.6e-08	3.45e-06
ENSG00000024862	CCDC28A	0.643009	3.37075	28.4421	9.66e-08	3.47e-06
ENSG00000092445	TYRO3	-0.390139	5.47687	28.4254	9.74e-08	3.49e-06
ENSG00000117899	MESDC2	-0.32544	7.15614	28.4017	9.86e-08	3.53e-06
ENSG00000197601	FAR1	0.327909	7.01586	28.3981	9.88e-08	3.54e-06
ENSG00000175471	MCTP1	0.52811	3.9904	28.3885	9.93e-08	3.55e-06
ENSG00000119138	KLF9	0.47003	4.53926	28.3554	1.01e-07	3.61e-06
ENSG00000132823	OSER1	0.357188	6.14842	28.3594	1.01e-07	3.6e-06
ENSG00000137168	PPIL1	-0.370866	5.83659	28.3642	1.01e-07	3.6e-06
ENSG00000115594	IL1R1	-1.15064	1.55218	28.3451	1.02e-07	3.63e-06
ENSG00000164251	F2RL1	0.541609	3.91776	28.3265	1.03e-07	3.66e-06
ENSG00000112137	PHACTR1	1.89892	0.362679	28.2725	1.05e-07	3.76e-06
ENSG00000114738	MAPKAPK3	-0.369915	5.83827	28.262	1.06e-07	3.77e-06
ENSG00000131759	RARA	0.430717	4.94071	28.2614	1.06e-07	3.77e-06
ENSG00000159388	BTG2	-0.66786	3.30244	28.2631	1.06e-07	3.77e-06
ENSG00000163535	SGOL2	-0.489441	4.40255	28.2708	1.06e-07	3.76e-06
ENSG00000104812	GYS1	-0.374469	5.69532	28.2147	1.09e-07	3.86e-06
ENSG00000164609	SLU7	0.351143	6.26108	28.2076	1.09e-07	3.87e-06
ENSG00000135074	ADAM19	-1.08298	1.54643	28.1988	1.1e-07	3.89e-06
ENSG00000120727	PAIP2	0.339061	6.58152	28.1797	1.11e-07	3.93e-06
ENSG00000128245	YWHAH	-0.345189	6.42368	28.1484	1.12e-07	3.98e-06
ENSG00000144460	NYAP2	0.625137	3.33998	28.1513	1.12e-07	3.98e-06
ENSG00000165813	C10orf118	0.458199	4.64302	28.1556	1.12e-07	3.97e-06
ENSG00000155254	MARVELD1	-0.362502	6.01239	28.1311	1.13e-07	4.01e-06
ENSG00000055147	FAM114A2	-0.498285	4.34434	28.1275	1.14e-07	4.02e-06
ENSG00000078114	NEBL	-0.631037	3.37175	28.1216	1.14e-07	4.03e-06
ENSG00000177337	DLGAP1-AS1	0.603561	3.57252	28.1189	1.14e-07	4.03e-06
ENSG00000183087	GAS6	-0.538301	4.03527	28.1189	1.14e-07	4.03e-06
ENSG00000085999	RAD54L	0.397989	5.35451	28.0803	1.16e-07	4.11e-06
ENSG00000125352	RNF113A	0.467005	4.55968	28.0909	1.16e-07	4.09e-06
ENSG00000139645	ANKRD52	-0.325679	7.04578	28.0626	1.18e-07	4.14e-06
ENSG00000173598	NUDT4	0.344753	6.39088	28.049	1.18e-07	4.17e-06
ENSG00000214114	MYCBP	-0.405522	5.22812	28.0483	1.18e-07	4.17e-06
ENSG00000071127	WDR1	-0.304168	8.02041	28.04	1.19e-07	4.18e-06
ENSG00000171658	RP11-443P15.2	1.06805	1.66176	28.0413	1.19e-07	4.18e-06
ENSG00000113273	ARSB	-0.46135	4.6183	27.9958	1.22e-07	4.27e-06
ENSG00000016391	CHDH	-0.865082	2.32536	27.9682	1.23e-07	4.33e-06
ENSG00000080031	PTPRH	1.22945	1.24675	27.9706	1.23e-07	4.33e-06
ENSG00000136925	TSTD2	0.467953	4.52567	27.9546	1.24e-07	4.36e-06
ENSG00000197362	ZNF786	-0.538621	4.02369	27.9371	1.25e-07	4.4e-06
ENSG00000162775	RBM15	0.388557	5.46116	27.9083	1.27e-07	4.46e-06
ENSG00000133226	SRRM1	-0.314953	7.50203	27.8935	1.28e-07	4.49e-06
ENSG00000150687	PRSS23	-0.292614	8.61127	27.8967	1.28e-07	4.48e-06
ENSG00000141543	EIF4A3	-0.333101	6.76521	27.8725	1.3e-07	4.53e-06
ENSG00000116128	BCL9	-0.757652	2.80187	27.8	1.35e-07	4.7e-06
ENSG00000086102	NFX1	0.343239	6.43466	27.7846	1.36e-07	4.74e-06
ENSG00000129083	COPB1	0.305824	7.86706	27.7802	1.36e-07	4.75e-06
ENSG00000151553	FAM160B1	0.452297	4.67571	27.7596	1.37e-07	4.79e-06
ENSG00000100591	AHSA1	-0.314278	7.50264	27.7534	1.38e-07	4.81e-06
ENSG00000163026	C2orf44	-0.536382	3.97193	27.7298	1.4e-07	4.86e-06
ENSG00000165801	ARHGEF40	-0.419819	5.02051	27.7212	1.4e-07	4.88e-06
ENSG00000154803	FLCN	0.473951	4.67444	27.7082	1.41e-07	4.91e-06
ENSG00000267121	CTD-2020K17.1	0.736601	2.76257	27.6741	1.44e-07	5e-06
ENSG00000005339	CREBBP	0.322917	7.02744	27.6525	1.45e-07	5.05e-06
ENSG00000014914	MTMR11	-0.607443	3.51432	27.6496	1.45e-07	5.05e-06
ENSG00000125520	SLC2A4RG	-0.343755	6.35247	27.6312	1.47e-07	5.1e-06
ENSG00000005189	AC004381.6	-0.620636	3.49161	27.5912	1.5e-07	5.2e-06
ENSG00000163602	RYBP	0.393808	5.35984	27.5898	1.5e-07	5.2e-06
ENSG00000166503	HDGFRP3	-0.333395	6.66736	27.5896	1.5e-07	5.2e-06
ENSG00000058600	POLR3E	0.356843	6.00044	27.5731	1.51e-07	5.24e-06
ENSG00000086289	EPDR1	-0.482605	4.40772	27.5771	1.51e-07	5.23e-06
ENSG00000142871	CYR61	0.316479	7.33136	27.5672	1.52e-07	5.25e-06
ENSG00000156521	TYSND1	-0.45368	4.65767	27.5215	1.55e-07	5.37e-06
ENSG00000213585	VDAC1	-0.295005	8.37725	27.508	1.57e-07	5.41e-06
ENSG00000187098	MITF	0.362137	5.78817	27.4906	1.58e-07	5.45e-06
ENSG00000198805	PNP	-0.348347	6.26464	27.4961	1.58e-07	5.44e-06
ENSG00000230650	AC112229.1	-1.14421	1.53801	27.4951	1.58e-07	5.44e-06
ENSG00000198792	TMEM184B	0.390296	5.36817	27.4788	1.59e-07	5.48e-06
ENSG00000104331	IMPAD1	-0.318814	7.20111	27.471	1.6e-07	5.5e-06
ENSG00000134375	TIMM17A	-0.341119	6.43449	27.4244	1.63e-07	5.63e-06
ENSG00000177542	SLC25A22	-0.407161	5.18599	27.4072	1.65e-07	5.67e-06
ENSG00000141499	WRAP53	-0.424555	4.99803	27.394	1.66e-07	5.71e-06
ENSG00000122778	KIAA1549	0.318076	7.17193	27.382	1.67e-07	5.74e-06
ENSG00000075975	MKRN2	0.339513	6.44259	27.3744	1.68e-07	5.76e-06
ENSG00000176595	KBTBD11	-1.67589	0.460221	27.3709	1.68e-07	5.77e-06
ENSG00000007392	LUC7L	0.360391	5.92447	27.3555	1.69e-07	5.81e-06
ENSG00000033327	GAB2	0.729721	2.74285	27.3454	1.7e-07	5.83e-06
ENSG00000127946	HIP1	-0.321924	7.01497	27.3509	1.7e-07	5.82e-06
ENSG00000160446	ZDHHC12	-0.480387	4.41762	27.3449	1.7e-07	5.83e-06
ENSG00000137760	ALKBH8	0.405488	5.12822	27.3371	1.71e-07	5.85e-06
ENSG00000151292	CSNK1G3	0.35742	5.94133	27.3348	1.71e-07	5.85e-06
ENSG00000176018	LYSMD3	0.370287	5.69982	27.3406	1.71e-07	5.84e-06
ENSG00000110660	SLC35F2	0.325678	6.82891	27.3244	1.72e-07	5.88e-06
ENSG00000123472	ATPAF1	-0.36396	5.82936	27.3204	1.72e-07	5.89e-06
ENSG00000125629	INSIG2	0.573819	3.67961	27.2815	1.76e-07	6e-06
ENSG00000152332	UHMK1	-0.301189	7.96975	27.2698	1.77e-07	6.04e-06
ENSG00000153982	GDPD1	0.980373	1.82013	27.267	1.77e-07	6.04e-06
ENSG00000121851	POLR3GL	-0.699968	3.00782	27.2282	1.81e-07	6.16e-06
ENSG00000162063	CCNF	-0.350702	6.14377	27.2121	1.82e-07	6.21e-06
ENSG00000185418	TARSL2	-0.442202	4.79346	27.2151	1.82e-07	6.2e-06
ENSG00000198947	DMD	0.398877	5.14701	27.194	1.84e-07	6.26e-06
ENSG00000153487	ING1	0.509189	4.14011	27.1813	1.85e-07	6.3e-06
ENSG00000082701	GSK3B	0.324239	6.87762	27.1754	1.86e-07	6.31e-06
ENSG00000172757	CFL1	-0.27151	9.71018	27.1771	1.86e-07	6.31e-06
ENSG00000255414	LINC01059	0.601478	3.47278	27.1175	1.92e-07	6.5e-06
ENSG00000068079	IFI35	0.579759	3.61596	27.0863	1.95e-07	6.6e-06
ENSG00000101871	MID1	0.333459	6.56445	27.0859	1.95e-07	6.6e-06
ENSG00000090020	SLC9A1	0.427226	4.84174	27.05	1.98e-07	6.72e-06
ENSG00000160752	FDPS	-0.309808	7.4786	27.0488	1.98e-07	6.72e-06
ENSG00000126070	AGO3	0.36397	5.78228	26.9728	2.06e-07	6.98e-06
ENSG00000005955	GGNBP2	0.328674	6.68389	26.9527	2.09e-07	7.05e-06
ENSG00000228716	DHFR	-0.315858	7.18681	26.9283	2.11e-07	7.14e-06
ENSG00000109107	ALDOC	-0.392076	5.32699	26.9237	2.12e-07	7.15e-06
ENSG00000172731	LRRC20	-0.603747	3.46726	26.9065	2.14e-07	7.21e-06
ENSG00000176155	CCDC57	0.360053	5.80253	26.8804	2.17e-07	7.3e-06
ENSG00000076382	SPAG5	-0.312533	7.33353	26.8625	2.19e-07	7.37e-06
ENSG00000085465	OVGP1	1.13362	1.4148	26.8397	2.21e-07	7.45e-06
ENSG00000197044	ZNF441	-0.944523	2.13957	26.8429	2.21e-07	7.44e-06
ENSG00000171951	SCG2	0.686225	3.0369	26.8056	2.25e-07	7.57e-06
ENSG00000143554	SLC27A3	-0.564209	3.72251	26.8013	2.26e-07	7.59e-06
ENSG00000131931	THAP1	0.433727	4.75265	26.7546	2.31e-07	7.77e-06
ENSG00000153029	MR1	-0.583691	3.61874	26.7445	2.32e-07	7.8e-06
ENSG00000089280	FUS	-0.278812	9.10612	26.74	2.33e-07	7.82e-06
ENSG00000168495	POLR3D	0.378866	5.48517	26.715	2.36e-07	7.91e-06
ENSG00000048342	CC2D2A	-0.470927	4.38356	26.6825	2.4e-07	8.04e-06
ENSG00000137221	TJAP1	0.391933	5.27125	26.6644	2.42e-07	8.12e-06
ENSG00000269893	SNHG8	0.610783	3.46494	26.6533	2.44e-07	8.16e-06
ENSG00000170581	STAT2	0.384503	5.41345	26.5879	2.52e-07	8.43e-06
ENSG00000178764	ZHX2	0.635469	3.20907	26.5843	2.52e-07	8.44e-06
ENSG00000168453	HR	-0.375428	5.47337	26.5762	2.53e-07	8.47e-06
ENSG00000169258	GPRIN1	-0.534949	3.8924	26.5621	2.55e-07	8.53e-06
ENSG00000002549	LAP3	-0.340228	6.32023	26.549	2.57e-07	8.58e-06
ENSG00000100526	CDKN3	-0.476284	4.39199	26.553	2.57e-07	8.57e-06
ENSG00000185651	UBE2L3	-0.325851	6.70411	26.5481	2.57e-07	8.58e-06
ENSG00000165280	VCP	-0.290954	8.31689	26.5199	2.61e-07	8.7e-06
ENSG00000164695	CHMP4C	0.532745	3.87208	26.5139	2.62e-07	8.72e-06
ENSG00000146576	C7orf26	0.500024	4.17113	26.4893	2.65e-07	8.83e-06
ENSG00000143196	DPT	-0.353846	5.95149	26.4828	2.66e-07	8.85e-06
ENSG00000117984	CTSD	0.293754	8.13241	26.4735	2.67e-07	8.89e-06
ENSG00000101843	PSMD10	-0.357527	5.84744	26.4462	2.71e-07	9.01e-06
ENSG00000169375	SIN3A	0.300105	7.75314	26.448	2.71e-07	9e-06
ENSG00000146263	MMS22L	0.337463	6.31123	26.4328	2.73e-07	9.06e-06
ENSG00000068784	SRBD1	-0.400169	5.19934	26.4066	2.77e-07	9.18e-06
ENSG00000065518	NDUFB4	-0.345445	6.13615	26.3849	2.8e-07	9.28e-06
ENSG00000188064	WNT7B	-0.781136	2.56943	26.3742	2.81e-07	9.33e-06
ENSG00000107554	DNMBP	0.349061	6.0523	26.3607	2.83e-07	9.39e-06
ENSG00000140830	TXNL4B	0.431261	4.78045	26.3582	2.84e-07	9.39e-06
ENSG00000100221	JOSD1	0.313434	7.13622	26.3466	2.85e-07	9.45e-06
ENSG00000141401	IMPA2	-0.32353	6.74892	26.3361	2.87e-07	9.49e-06
ENSG00000137177	KIF13A	-0.312832	7.16051	26.3157	2.9e-07	9.59e-06
ENSG00000269439	CTD-3131K8.2	1.61513	0.478353	26.3076	2.91e-07	9.62e-06
ENSG00000131089	ARHGEF9	-0.609702	3.39813	26.263	2.98e-07	9.84e-06
ENSG00000122691	TWIST1	-0.487475	4.23491	26.2529	3e-07	9.89e-06
ENSG00000197183	C20orf112	-0.493349	4.1296	26.2314	3.03e-07	9.99e-06
ENSG00000175087	PDIK1L	0.480151	4.30025	26.223	3.04e-07	1e-05
ENSG00000134644	PUM1	0.308139	7.32143	26.2134	3.06e-07	1.01e-05
ENSG00000198860	TSEN15	0.343524	6.10681	26.2149	3.06e-07	1.01e-05
ENSG00000075413	MARK3	0.318154	6.88994	26.194	3.09e-07	1.02e-05
ENSG00000114626	ABTB1	0.88112	2.1122	26.1933	3.09e-07	1.02e-05
ENSG00000164520	RAET1E	0.358246	5.6897	26.1434	3.17e-07	1.04e-05
ENSG00000171155	C1GALT1C1	-0.38659	5.30219	26.1118	3.22e-07	1.06e-05
ENSG00000100304	TTLL12	-0.3175	6.9083	26.0645	3.3e-07	1.08e-05
ENSG00000137819	PAQR5	0.45803	4.39148	26.0642	3.3e-07	1.08e-05
ENSG00000047644	WWC3	0.338893	6.16228	26.0148	3.39e-07	1.11e-05
ENSG00000186951	PPARA	0.441362	4.59817	25.9854	3.44e-07	1.13e-05
ENSG00000187735	TCEA1	0.332011	6.3701	25.9849	3.44e-07	1.13e-05
ENSG00000198961	PJA2	0.307373	7.28984	25.9668	3.48e-07	1.14e-05
ENSG00000139405	RITA1	-0.344078	6.08933	25.9583	3.49e-07	1.14e-05
ENSG00000179241	LDLRAD3	0.360932	5.6391	25.9517	3.5e-07	1.15e-05
ENSG00000010818	HIVEP2	0.448926	4.59198	25.9461	3.51e-07	1.15e-05
ENSG00000169564	PCBP1	-0.291449	8.10494	25.9428	3.52e-07	1.15e-05
ENSG00000120686	UFM1	0.330554	6.43724	25.935	3.53e-07	1.15e-05
ENSG00000169752	NRG4	-0.456225	4.50368	25.9345	3.53e-07	1.15e-05
ENSG00000136158	SPRY2	0.86355	2.16922	25.9285	3.54e-07	1.16e-05
ENSG00000168476	REEP4	0.363695	5.60548	25.9085	3.58e-07	1.17e-05
ENSG00000137440	FGFBP1	-2.36519	-0.552924	25.8942	3.61e-07	1.18e-05
ENSG00000088970	PLK1S1	0.494515	4.11923	25.8793	3.64e-07	1.18e-05
ENSG00000079335	CDC14A	0.682054	2.93449	25.8354	3.72e-07	1.21e-05
ENSG00000132436	FIGNL1	0.332898	6.35329	25.8281	3.73e-07	1.21e-05
ENSG00000235823	LINC00263	0.883169	2.16006	25.8093	3.77e-07	1.23e-05
ENSG00000112977	DAP	0.293108	7.95201	25.8062	3.78e-07	1.23e-05
ENSG00000139278	GLIPR1	-0.495358	4.10155	25.8015	3.79e-07	1.23e-05
ENSG00000162222	TTC9C	0.441546	4.62359	25.7888	3.81e-07	1.24e-05
ENSG00000123388	HOXC11	-1.44519	0.718262	25.7678	3.85e-07	1.25e-05
ENSG00000163932	PRKCD	-0.510324	3.99607	25.7696	3.85e-07	1.25e-05
ENSG00000068383	INPP5A	-0.574843	3.62751	25.7492	3.89e-07	1.26e-05
ENSG00000225973	RP11-139H15.1	0.695799	2.88483	25.7457	3.9e-07	1.26e-05
ENSG00000204070	SYS1	0.366885	5.54894	25.7041	3.98e-07	1.29e-05
ENSG00000146112	PPP1R18	0.314677	6.91185	25.694	4e-07	1.29e-05
ENSG00000162600	OMA1	-0.51799	3.9991	25.6941	4e-07	1.29e-05
ENSG00000109320	NFKB1	0.340128	6.09371	25.6732	4.05e-07	1.31e-05
ENSG00000170502	NUDT9	-0.492446	4.19801	25.6463	4.1e-07	1.32e-05
ENSG00000162614	NEXN	-0.399244	5.04281	25.639	4.12e-07	1.33e-05
ENSG00000139291	TMEM19	-0.385763	5.2717	25.6022	4.2e-07	1.35e-05
ENSG00000135387	CAPRIN1	-0.272277	9.11461	25.5882	4.23e-07	1.36e-05
ENSG00000150433	TMEM218	-0.51029	4.05781	25.586	4.23e-07	1.36e-05
ENSG00000237649	KIFC1	-0.326427	6.51252	25.5814	4.24e-07	1.37e-05
ENSG00000136710	CCDC115	-0.633808	3.26478	25.5772	4.25e-07	1.37e-05
ENSG00000007314	SCN4A	3.02996	-0.959838	25.5707	4.27e-07	1.37e-05
ENSG00000158050	DUSP2	-0.550664	3.79717	25.5569	4.3e-07	1.38e-05
ENSG00000173744	AGFG1	0.329495	6.37389	25.5572	4.3e-07	1.38e-05
ENSG00000146540	C7orf50	-0.381292	5.34908	25.5494	4.31e-07	1.38e-05
ENSG00000174574	AKIRIN1	0.324777	6.53147	25.5226	4.37e-07	1.4e-05
ENSG00000178726	THBD	0.936953	1.85784	25.5023	4.42e-07	1.42e-05
ENSG00000160209	PDXK	-0.295398	7.75423	25.4564	4.53e-07	1.45e-05
ENSG00000205746	RP11-1212A22.1	0.975166	1.73911	25.4443	4.56e-07	1.46e-05
ENSG00000112851	ERBB2IP	0.296142	7.66017	25.4388	4.57e-07	1.46e-05
ENSG00000234741	GAS5	0.292285	7.90008	25.4289	4.59e-07	1.47e-05
ENSG00000109445	ZNF330	0.335503	6.2352	25.396	4.67e-07	1.49e-05
ENSG00000171365	CLCN5	0.398475	5.0809	25.39	4.69e-07	1.5e-05
ENSG00000173786	CNP	-0.317729	6.73759	25.3757	4.72e-07	1.51e-05
ENSG00000243701	LINC00883	-0.614301	3.25171	25.3722	4.73e-07	1.51e-05
ENSG00000214145	LINC00887	0.84524	2.15377	25.3569	4.77e-07	1.52e-05
ENSG00000236345	RP11-59D5__B.2	2.07118	-0.298221	25.344	4.8e-07	1.53e-05
ENSG00000006744	ELAC2	-0.297965	7.57625	25.3319	4.83e-07	1.54e-05
ENSG00000150995	ITPR1	0.280936	8.50018	25.3322	4.83e-07	1.54e-05
ENSG00000159658	EFCAB14	-0.313708	6.87437	25.308	4.89e-07	1.56e-05
ENSG00000112208	BAG2	-0.317432	6.73193	25.2847	4.95e-07	1.57e-05
ENSG00000178409	BEND3	-0.451106	4.47038	25.282	4.96e-07	1.58e-05
ENSG00000089682	RBM41	0.378816	5.26499	25.2432	5.06e-07	1.61e-05
ENSG00000135111	TBX3	0.298925	7.57957	25.2375	5.07e-07	1.61e-05
ENSG00000228707	RP11-787B4.2	1.79193	0.023324	25.2284	5.1e-07	1.62e-05
ENSG00000137040	RANBP6	-0.368967	5.47485	25.1993	5.17e-07	1.64e-05
ENSG00000181163	NPM1	-0.245067	10.8428	25.1886	5.2e-07	1.65e-05
ENSG00000273415	RP11-702B10.2	2.32612	-0.528255	25.1772	5.23e-07	1.66e-05
ENSG00000112855	HARS2	-0.353162	5.77751	25.1685	5.26e-07	1.66e-05
ENSG00000019995	ZRANB1	0.353243	5.70586	25.1597	5.28e-07	1.67e-05
ENSG00000163156	SCNM1	0.360468	5.58279	25.1476	5.31e-07	1.68e-05
ENSG00000163743	RCHY1	0.458134	4.4068	25.1417	5.33e-07	1.69e-05
ENSG00000145451	GLRA3	0.946973	1.78832	25.1357	5.35e-07	1.69e-05
ENSG00000158711	ELK4	0.316915	6.68786	25.1234	5.38e-07	1.7e-05
ENSG00000163811	WDR43	0.300098	7.37073	25.1111	5.41e-07	1.71e-05
ENSG00000166949	SMAD3	0.407693	4.93559	25.1103	5.42e-07	1.71e-05
ENSG00000067334	DNTTIP2	-0.308427	7.0557	25.09	5.47e-07	1.73e-05
ENSG00000229953	RP11-284F21.7	1.10191	1.35317	25.0914	5.47e-07	1.73e-05
ENSG00000205659	LIN52	0.503159	4.05001	25.0879	5.48e-07	1.73e-05
ENSG00000158473	CD1D	-1.91759	-0.128338	25.0765	5.51e-07	1.74e-05
ENSG00000140598	EFTUD1	0.332429	6.19954	25.0471	5.6e-07	1.76e-05
ENSG00000118507	AKAP7	-0.541116	3.80713	25.0387	5.62e-07	1.77e-05
ENSG00000109572	CLCN3	0.30438	7.16143	25.029	5.65e-07	1.78e-05
ENSG00000178209	PLEC	0.246066	10.7026	25.016	5.69e-07	1.79e-05
ENSG00000183853	KIRREL	0.289556	7.86035	25.0083	5.71e-07	1.79e-05
ENSG00000007520	TSR3	-0.350268	5.79734	25.0058	5.72e-07	1.79e-05
ENSG00000185275	CD24P4	-0.308173	7.03578	24.9878	5.77e-07	1.81e-05
ENSG00000166407	LMO1	-0.981415	1.71069	24.9674	5.83e-07	1.83e-05
ENSG00000186660	ZFP91	0.294496	7.60618	24.9189	5.98e-07	1.87e-05
ENSG00000100014	SPECC1L	0.432788	4.6292	24.909	6.01e-07	1.88e-05
ENSG00000178966	RMI1	0.367643	5.42782	24.9102	6.01e-07	1.88e-05
ENSG00000154945	ANKRD40	0.333111	6.15932	24.9016	6.04e-07	1.89e-05
ENSG00000198324	FAM109A	0.572092	3.48182	24.8938	6.06e-07	1.89e-05
ENSG00000204775	KM-PA-2	-0.995991	1.53702	24.8904	6.07e-07	1.9e-05
ENSG00000260872	RP11-680G24.5	0.976761	1.69294	24.8763	6.12e-07	1.91e-05
ENSG00000167676	PLIN4	0.37662	5.33964	24.856	6.18e-07	1.93e-05
ENSG00000232833	FAM27E3	1.53447	0.460284	24.8557	6.18e-07	1.93e-05
ENSG00000157168	NRG1	1.59078	0.292643	24.8259	6.28e-07	1.96e-05
ENSG00000148677	ANKRD1	0.931562	2.34274	24.8026	6.35e-07	1.98e-05
ENSG00000129625	REEP5	-0.305112	7.09636	24.7998	6.36e-07	1.98e-05
ENSG00000164039	BDH2	-0.559467	3.61258	24.798	6.37e-07	1.98e-05
ENSG00000134827	TCN1	0.923554	1.82551	24.7936	6.38e-07	1.99e-05
ENSG00000133895	MEN1	-0.342973	5.9079	24.7836	6.42e-07	2e-05
ENSG00000145907	G3BP1	-0.278744	8.44061	24.7653	6.48e-07	2.01e-05
ENSG00000167447	SMG8	-0.370733	5.43817	24.7524	6.52e-07	2.03e-05
ENSG00000173898	SPTBN2	-0.332567	6.1339	24.7384	6.57e-07	2.04e-05
ENSG00000173457	PPP1R14B	-0.353822	5.67104	24.7361	6.58e-07	2.04e-05
ENSG00000136280	CCM2	-0.403177	4.96744	24.7257	6.61e-07	2.05e-05
ENSG00000214078	CPNE1	0.30806	6.94482	24.6966	6.71e-07	2.08e-05
ENSG00000156136	DCK	-0.37415	5.33342	24.6936	6.72e-07	2.08e-05
ENSG00000143416	SELENBP1	-0.430768	4.61591	24.6921	6.73e-07	2.08e-05
ENSG00000091136	LAMB1	0.275819	8.55685	24.6831	6.76e-07	2.09e-05
ENSG00000198915	RASGEF1A	-0.550834	3.63937	24.6829	6.76e-07	2.09e-05
ENSG00000131873	CHSY1	0.32403	6.38883	24.6781	6.78e-07	2.1e-05
ENSG00000188177	ZC3H6	0.596382	3.40614	24.662	6.83e-07	2.11e-05
ENSG00000132002	DNAJB1	-0.308939	6.98885	24.6587	6.85e-07	2.11e-05
ENSG00000157911	PEX10	-0.456534	4.38826	24.6538	6.86e-07	2.12e-05
ENSG00000121879	PIK3CA	0.349859	5.67667	24.6513	6.87e-07	2.12e-05
ENSG00000082805	ERC1	-0.314061	6.68162	24.6482	6.88e-07	2.12e-05
ENSG00000233429	HOTAIRM1	0.560387	3.60101	24.6387	6.92e-07	2.13e-05
ENSG00000075391	RASAL2	0.31336	6.69361	24.6053	7.04e-07	2.17e-05
ENSG00000167653	PSCA	-0.392725	5.09937	24.5723	7.16e-07	2.2e-05
ENSG00000112640	PPP2R5D	-0.327415	6.28642	24.5646	7.19e-07	2.21e-05
ENSG00000247903	RP11-421F16.3	-0.606922	3.28648	24.5631	7.19e-07	2.21e-05
ENSG00000156928	MALSU1	-0.41355	4.832	24.5566	7.22e-07	2.22e-05
ENSG00000100575	TIMM9	0.415763	4.76732	24.533	7.31e-07	2.24e-05
ENSG00000232931	LINC00342	-0.555083	3.63476	24.526	7.33e-07	2.25e-05
ENSG00000184702	2023-09-05	-1.76311	0.0901222	24.5154	7.38e-07	2.26e-05
ENSG00000135766	EGLN1	0.317932	6.48672	24.4791	7.52e-07	2.3e-05
ENSG00000011243	AKAP8L	0.349626	5.66971	24.4713	7.55e-07	2.31e-05
ENSG00000106348	IMPDH1	-0.323577	6.37336	24.4541	7.61e-07	2.33e-05
ENSG00000206053	HN1L	-0.29605	7.42536	24.4488	7.63e-07	2.34e-05
ENSG00000136068	FLNB	0.267524	8.9957	24.4473	7.64e-07	2.34e-05
ENSG00000185565	LSAMP	0.770941	2.44628	24.4272	7.72e-07	2.36e-05
ENSG00000126903	SLC10A3	-0.370978	5.36137	24.42	7.75e-07	2.37e-05
ENSG00000128908	INO80	0.328841	6.21592	24.4162	7.77e-07	2.37e-05
ENSG00000109881	CCDC34	-0.403256	4.92571	24.4123	7.78e-07	2.38e-05
ENSG00000224177	LINC00570	1.2784	0.823928	24.3993	7.83e-07	2.39e-05
ENSG00000170791	CHCHD7	-0.510598	3.92672	24.3952	7.85e-07	2.39e-05
ENSG00000158710	TAGLN2	-0.258901	9.58366	24.3733	7.94e-07	2.42e-05
ENSG00000170485	NPAS2	0.370529	5.26616	24.3662	7.97e-07	2.43e-05
ENSG00000234231	AC093616.4	0.731204	2.61383	24.3652	7.97e-07	2.43e-05
ENSG00000167182	SP2	0.490388	4.0337	24.343	8.07e-07	2.46e-05
ENSG00000103994	ZNF106	0.292035	7.55634	24.3382	8.09e-07	2.46e-05
ENSG00000133026	MYH10	-0.296097	7.35443	24.3377	8.09e-07	2.46e-05
ENSG00000125398	SOX9	-0.598317	3.2912	24.332	8.11e-07	2.47e-05
ENSG00000107485	GATA3	1.06795	1.36843	24.2727	8.37e-07	2.54e-05
ENSG00000168566	SNRNP48	0.311019	6.70546	24.2638	8.4e-07	2.55e-05
ENSG00000245694	CRNDE	0.495549	3.98764	24.2646	8.4e-07	2.55e-05
ENSG00000162521	RBBP4	-0.296165	7.35031	24.2596	8.42e-07	2.55e-05
ENSG00000156642	NPTN	-0.296491	7.33866	24.245	8.49e-07	2.57e-05
ENSG00000067167	TRAM1	0.280307	8.14945	24.2279	8.56e-07	2.59e-05
ENSG00000121966	CXCR4	0.338505	5.9254	24.2223	8.59e-07	2.6e-05
ENSG00000116793	PHTF1	-0.379705	5.19874	24.2095	8.64e-07	2.62e-05
ENSG00000196792	STRN3	0.368346	5.34502	24.2104	8.64e-07	2.62e-05
ENSG00000109756	RAPGEF2	0.339511	5.81694	24.1934	8.72e-07	2.64e-05
ENSG00000146731	CCT6A	-0.260771	9.3799	24.167	8.84e-07	2.67e-05
ENSG00000170873	MTSS1	-0.716728	2.68866	24.1668	8.84e-07	2.67e-05
ENSG00000154839	SKA1	0.371891	5.3047	24.163	8.86e-07	2.67e-05
ENSG00000092847	AGO1	-0.344054	5.76833	24.1584	8.88e-07	2.68e-05
ENSG00000038219	BOD1L1	0.291239	7.53045	24.1398	8.96e-07	2.7e-05
ENSG00000127989	MTERF	-0.494532	4.01676	24.1388	8.97e-07	2.7e-05
ENSG00000110321	EIF4G2	-0.247378	10.2985	24.1313	9e-07	2.71e-05
ENSG00000092201	SUPT16H	-0.27854	8.22543	24.1193	9.06e-07	2.73e-05
ENSG00000122786	CALD1	-0.280223	8.10966	24.0812	9.24e-07	2.78e-05
ENSG00000160471	COX6B2	1.44081	0.532493	24.0814	9.24e-07	2.78e-05
ENSG00000076984	MAP2K7	0.341031	5.78988	24.0664	9.31e-07	2.8e-05
ENSG00000105732	ZNF574	-0.57002	3.5498	24.0649	9.32e-07	2.8e-05
ENSG00000126012	KDM5C	0.297002	7.22281	24.0656	9.32e-07	2.8e-05
ENSG00000163961	RNF168	0.336551	5.93609	24.0531	9.38e-07	2.81e-05
ENSG00000205221	VIT	-0.546739	3.57943	24.0514	9.38e-07	2.82e-05
ENSG00000135454	B4GALNT1	-0.332365	6.04406	24.041	9.44e-07	2.83e-05
ENSG00000125534	PPDPF	-0.297386	7.22808	24.0104	9.59e-07	2.87e-05
ENSG00000186162	CIDECP	0.551624	3.63565	24.0084	9.6e-07	2.87e-05
ENSG00000156804	FBXO32	1.43189	0.836653	23.9961	9.66e-07	2.89e-05
ENSG00000148411	NACC2	-0.350171	5.60667	23.9934	9.67e-07	2.89e-05
ENSG00000196155	PLEKHG4	-0.427952	4.59033	23.9736	9.77e-07	2.92e-05
ENSG00000129422	MTUS1	0.302969	6.94723	23.9721	9.78e-07	2.92e-05
ENSG00000159335	PTMS	-0.293163	7.40658	23.9604	9.84e-07	2.94e-05
ENSG00000143751	SDE2	0.431647	4.60224	23.9295	1e-06	2.99e-05
ENSG00000198721	ECI2	-0.330478	6.08401	23.9195	1e-06	3e-05
ENSG00000103489	XYLT1	0.80486	2.2691	23.9191	1.01e-06	3e-05
ENSG00000146067	FAM193B	0.386282	5.09201	23.9086	1.01e-06	3.01e-05
ENSG00000149269	PAK1	-0.426096	4.62755	23.9183	1.01e-06	3e-05
ENSG00000095303	PTGS1	0.476436	4.08781	23.8816	1.02e-06	3.05e-05
ENSG00000138386	NAB1	0.342895	5.71762	23.8886	1.02e-06	3.04e-05
ENSG00000162613	FUBP1	-0.281367	7.99345	23.8868	1.02e-06	3.04e-05
ENSG00000139324	TMTC3	-0.322243	6.29524	23.8487	1.04e-06	3.1e-05
ENSG00000154736	ADAMTS5	0.406659	4.78727	23.8455	1.04e-06	3.1e-05
ENSG00000119139	TJP2	0.312727	6.52437	23.8121	1.06e-06	3.16e-05
ENSG00000114739	ACVR2B	0.550825	3.59202	23.7981	1.07e-06	3.18e-05
ENSG00000138463	DIRC2	0.449881	4.34149	23.7867	1.08e-06	3.2e-05
ENSG00000178980	SEPW1	-0.339485	5.86836	23.7848	1.08e-06	3.2e-05
ENSG00000126243	LRFN3	-0.802286	2.37684	23.7608	1.09e-06	3.24e-05
ENSG00000126787	DLGAP5	-0.324491	6.21473	23.7537	1.1e-06	3.25e-05
ENSG00000169871	TRIM56	0.450459	4.3361	23.7252	1.11e-06	3.29e-05
ENSG00000103356	EARS2	-0.375192	5.22177	23.7132	1.12e-06	3.31e-05
ENSG00000104885	DOT1L	0.294699	7.25375	23.7109	1.12e-06	3.31e-05
ENSG00000177302	TOP3A	0.329522	6.07344	23.709	1.12e-06	3.32e-05
ENSG00000185246	PRPF39	-0.36252	5.41199	23.6561	1.15e-06	3.4e-05
ENSG00000270580	RP11-1186N24.5	1.39945	0.562321	23.6572	1.15e-06	3.4e-05
ENSG00000008394	MGST1	-0.31199	6.55639	23.6383	1.16e-06	3.43e-05
ENSG00000179010	MRFAP1	-0.274386	8.32074	23.6454	1.16e-06	3.42e-05
ENSG00000099399	MAGEB2	-0.365621	5.35725	23.6283	1.17e-06	3.45e-05
ENSG00000070831	CDC42	-0.281756	7.87675	23.6078	1.18e-06	3.48e-05
ENSG00000110047	EHD1	0.324647	6.10888	23.6144	1.18e-06	3.47e-05
ENSG00000137269	LRRC1	0.534107	3.67102	23.6185	1.18e-06	3.46e-05
ENSG00000188529	SRSF10	-0.404325	4.82581	23.6012	1.19e-06	3.49e-05
ENSG00000197712	FAM114A1	0.333691	5.94089	23.5883	1.19e-06	3.51e-05
ENSG00000023902	PLEKHO1	-0.562537	3.60025	23.5622	1.21e-06	3.56e-05
ENSG00000105971	CAV2	-0.303729	6.77747	23.5506	1.22e-06	3.58e-05
ENSG00000163960	UBXN7	0.308828	6.60491	23.5389	1.22e-06	3.6e-05
ENSG00000260336	RP11-395B7.7	0.390164	4.96622	23.5401	1.22e-06	3.6e-05
ENSG00000137806	NDUFAF1	-0.535704	3.74346	23.5194	1.24e-06	3.63e-05
ENSG00000135378	PRRG4	-1.47424	0.479102	23.5057	1.25e-06	3.66e-05
ENSG00000137713	PPP2R1B	-0.380817	5.14987	23.4929	1.25e-06	3.68e-05
ENSG00000198886	MT-ND4	-0.207596	13.1049	23.491	1.26e-06	3.68e-05
ENSG00000215251	FASTKD5	-0.403101	4.85641	23.4773	1.26e-06	3.7e-05
ENSG00000125834	STK35	0.389144	4.98604	23.4654	1.27e-06	3.72e-05
ENSG00000109452	INPP4B	0.651266	2.87668	23.4423	1.29e-06	3.77e-05
ENSG00000169826	CSGALNACT2	0.349439	5.5564	23.4262	1.3e-06	3.8e-05
ENSG00000020256	ZFP64	0.363429	5.28356	23.416	1.31e-06	3.82e-05
ENSG00000163597	SNHG16	0.326784	6.09804	23.4139	1.31e-06	3.82e-05
ENSG00000047346	FAM214A	0.476436	4.13858	23.3968	1.32e-06	3.85e-05
ENSG00000131370	SH3BP5	0.3367	5.83371	23.3988	1.32e-06	3.85e-05
ENSG00000105877	DNAH11	0.823062	2.1669	23.3658	1.34e-06	3.91e-05
ENSG00000147394	ZNF185	-0.403169	4.80813	23.3716	1.34e-06	3.9e-05
ENSG00000105993	DNAJB6	0.286033	7.55985	23.3481	1.35e-06	3.94e-05
ENSG00000134440	NARS	0.281337	7.8049	23.3507	1.35e-06	3.94e-05
ENSG00000102753	KPNA3	-0.311931	6.4827	23.3345	1.36e-06	3.96e-05
ENSG00000117139	KDM5B	0.455271	4.21215	23.3248	1.37e-06	3.98e-05
ENSG00000172667	ZMAT3	-0.436291	4.49365	23.3283	1.37e-06	3.98e-05
ENSG00000167460	TPM4	-0.24934	9.84496	23.2916	1.39e-06	4.05e-05
ENSG00000008869	HEATR5B	0.346528	5.56109	23.2156	1.45e-06	4.21e-05
ENSG00000101346	POFUT1	-0.284137	7.64775	23.2187	1.45e-06	4.2e-05
ENSG00000162923	WDR26	0.311747	6.45101	23.2166	1.45e-06	4.2e-05
ENSG00000114450	GNB4	-0.319403	6.21043	23.2052	1.46e-06	4.23e-05
ENSG00000073921	PICALM	0.264204	8.75243	23.1428	1.5e-06	4.36e-05
ENSG00000243317	C7orf73	-0.341481	5.68935	23.1545	1.5e-06	4.34e-05
ENSG00000091592	NLRP1	0.59991	3.05125	23.1324	1.51e-06	4.38e-05
ENSG00000100243	CYB5R3	-0.293129	7.17083	23.1307	1.51e-06	4.38e-05
ENSG00000175054	ATR	-0.314802	6.34857	23.1175	1.52e-06	4.41e-05
[truncated: 55,906 more rows]
