# Supplementary material for: Transcriptome Analysis of the Inhibitory Effects of 20(S)-Protopanaxadiol on NCI-H1299 Non-Small Cell Lung Cancer Cells
Source: MDPI journal article supplement (doi:10.3390/molecules28155746), 2023-07-29
Supplement: s1 [file Table S8 DEGs of lung adenocarcinoma.xls]

	logFC	logCPM	PValue	FDR
RTKN2	-4.084627842	5.548776641	3.64E-225	2.16E-220
STX11	-3.066126171	4.204344818	5.92E-209	1.76E-204
FAM107A	-4.542703406	5.277926174	9.45E-209	1.87E-204
OTUD1	-2.125616889	4.644723933	1.12E-205	1.66E-201
TEK	-3.257645386	4.426190271	7.98E-195	9.49E-191
SPAAR	-2.729897645	0.605976015	7.92E-194	7.84E-190
EPAS1	-2.711202703	9.27332019	2.54E-193	2.16E-189
RGCC	-2.885579945	6.259430046	2.46E-191	1.83E-187
SEMA3G	-3.221766762	4.017375877	7.03E-191	4.64E-187
S1PR1	-2.855620766	5.330428185	1.64E-190	9.72E-187
EMP2	-2.726141456	8.363436321	1.82E-182	9.17E-179
RAMP3	-3.226109139	4.655064947	1.85E-182	9.17E-179
EDNRB	-3.505185011	5.109753436	6.23E-179	2.85E-175
SLC6A4	-6.15119506	4.634336072	3.96E-177	1.68E-173
PECAM1	-2.318070771	8.079462283	8.68E-174	3.44E-170
PTPN21	-2.455028759	4.713085318	1.17E-173	4.34E-170
FCN3	-4.524231983	5.095097976	8.15E-173	2.85E-169
ACVRL1	-2.566622274	5.662251962	1.25E-172	4.13E-169
LDB2	-2.607754707	4.475443581	2.19E-171	6.84E-168
PALM2AKAP2	-2.517272061	7.115681787	1.91E-169	5.67E-166
PRX	-3.346027644	4.671352049	7.02E-169	1.99E-165
AL606469.1	-5.22588473	-1.412991237	2.45E-165	6.62E-162
RAMP2	-2.869630397	4.384198597	3.70E-165	9.55E-162
HSPA12B	-2.78691473	3.288395322	4.23E-165	1.05E-161
AC093110.1	-3.328072404	1.363328056	9.86E-164	2.34E-160
WWC2	-2.370939264	5.498182971	1.17E-162	2.68E-159
AL590226.1	-3.630521657	-0.431982594	2.01E-162	4.43E-159
ANGPT4	-4.227043748	0.337556568	2.80E-160	5.95E-157
LIMS2	-2.814414135	4.777901435	5.56E-157	1.14E-153
FABP4	-4.907453479	4.443474819	4.59E-156	9.09E-153
AGER	-5.020596303	8.319226371	1.26E-155	2.41E-152
SPOCK2	-3.20803938	7.157381548	3.20E-154	5.95E-151
ROBO4	-2.84487878	4.861183799	3.43E-154	6.18E-151
JAM2	-2.518974643	4.016374203	3.04E-152	5.31E-149
CALCRL	-2.752176017	5.797902901	7.39E-152	1.25E-148
TAL1	-2.807955192	2.094391245	2.12E-150	3.50E-147
MYZAP	-3.299312541	1.574347742	1.87E-149	3.00E-146
FHL1	-3.429118447	6.128218066	2.11E-149	3.31E-146
CAVIN2	-3.314071266	6.159866557	2.62E-149	3.99E-146
CD101	-2.770112865	2.481394993	6.76E-149	1.00E-145
KANK3	-2.862045179	2.636940047	6.07E-147	8.80E-144
CDH5	-2.552280452	6.150903318	9.35E-147	1.32E-143
FMO2	-3.278212298	5.821429672	1.26E-146	1.74E-143
CLEC3B	-3.769507539	3.34640708	1.59E-146	2.15E-143
TMEM100	-4.370147382	4.684818148	1.89E-144	2.49E-141
FOXF1	-2.750731805	3.757545829	5.88E-142	7.60E-139
PLAC9	-2.735402236	2.703531223	1.08E-140	1.37E-137
FENDRR	-3.909995535	3.420238555	1.91E-140	2.36E-137
SMAD6	-2.577633946	4.283602829	3.79E-140	4.60E-137
SGCG	-3.834445045	0.005975555	1.19E-138	1.41E-135
GYPE	-3.308939941	-0.182882568	1.42E-137	1.66E-134
ARHGEF26	-2.691371674	4.669831066	2.19E-135	2.51E-132
PRKCE	-1.896114071	4.552395274	3.67E-135	4.12E-132
GIMAP8	-2.459884673	4.631975414	1.74E-134	1.91E-131
ADRB2	-3.093217214	3.316697036	3.67E-134	3.96E-131
CYYR1	-2.282764986	4.14189758	8.29E-134	8.79E-131
LINC00968	-3.539046475	0.711089618	1.41E-133	1.47E-130
SH2D3C	-2.294672856	4.668604971	2.61E-132	2.67E-129
LANCL1-AS1	-3.640107664	0.362335996	1.08E-131	1.09E-128
CAV1	-3.4107599	8.164833939	2.26E-131	2.24E-128
LYVE1	-3.211274336	3.838352622	6.27E-130	6.11E-127
GRK5	-2.496760922	5.041393047	3.13E-129	3.00E-126
ST8SIA6	-3.556632102	2.570123421	5.10E-129	4.81E-126
VIPR1	-3.231391763	4.728607003	1.08E-128	1.00E-125
CCM2L	-2.542115373	1.303899081	8.60E-128	7.86E-125
GPD1	-3.944609922	3.672129248	2.87E-126	2.58E-123
FGD5	-2.249158857	4.803655721	1.84E-125	1.63E-122
GPM6A	-4.462278854	3.236060027	2.00E-125	1.74E-122
AC084871.3	-3.621541406	-0.293193843	1.42E-124	1.22E-121
STARD13	-2.027360121	4.235813177	2.77E-123	2.35E-120
HBA2	-4.165479989	4.434375915	5.00E-122	4.18E-119
MYCT1	-2.266662285	3.527012103	7.74E-122	6.38E-119
HBB	-4.255617776	6.967120835	1.50E-121	1.22E-118
ARHGEF15	-2.452551694	3.847970762	1.57E-121	1.26E-118
RXFP1	-3.119218287	1.220875537	1.79E-121	1.42E-118
CLEC1A	-2.296462484	2.090362806	2.83E-121	2.22E-118
NECAB1	-3.233605986	2.145493353	1.61E-120	1.24E-117
INMT	-3.528308769	5.73541572	2.38E-120	1.82E-117
SOX7	-2.935964909	2.777034714	2.72E-120	2.05E-117
LRRC32	-2.365043043	5.53943247	5.77E-119	4.28E-116
CLIC5	-3.62917386	6.285856829	8.66E-119	6.35E-116
TNNC1	-3.575670195	3.869448277	1.94E-118	1.41E-115
USHBP1	-2.317199948	1.666863795	4.19E-118	3.00E-115
CSRNP1	-2.388202889	6.187865928	4.76E-118	3.37E-115
PTPRB	-2.58639908	5.685521239	7.30E-118	5.10E-115
SCUBE1	-3.577995928	3.03096917	1.23E-117	8.53E-115
STARD8	-2.213004262	3.993911689	1.29E-117	8.80E-115
AP001189.1	-3.07843078	-0.445205615	1.14E-116	7.67E-114
ERG	-2.152003047	4.501401148	1.47E-116	9.81E-114
STXBP6	-3.509664585	3.11237674	2.02E-116	1.33E-113
CLEC14A	-2.299628	5.108135241	2.27E-116	1.48E-113
EMCN	-2.753751731	4.391638586	2.69E-116	1.74E-113
ARHGAP6	-2.37479677	2.688236115	4.94E-116	3.16E-113
HBA1	-4.377316598	-0.986916096	6.61E-116	4.18E-113
CD300LG	-4.965838167	1.492296042	1.35E-115	8.46E-113
NOVA2	-2.418883262	2.59438326	1.57E-115	9.72E-113
TAMALIN	-2.359181289	3.686343958	3.80E-115	2.33E-112
MCEMP1	-4.035069707	4.173644294	1.13E-114	6.84E-112
SLC39A8	-2.500598765	7.537402255	1.18E-114	7.09E-112
C20orf202	-2.573159014	-1.04229407	1.16E-113	6.91E-111
THSD1	-2.243248018	2.629624169	3.03E-113	1.78E-110
ECSCR	-2.255981874	0.097703565	4.34E-113	2.53E-110
GPIHBP1	-3.704894924	3.226949419	2.73E-110	1.57E-107
ALAS2	-4.091482788	-0.836187326	5.13E-110	2.93E-107
AOC3	-2.654616726	6.369211007	1.43E-109	8.07E-107
AC009093.3	-4.164024287	1.586978575	2.35E-109	1.32E-106
SOX17	-2.716807341	1.943669712	5.42E-109	3.01E-106
MMRN2	-2.135887242	4.983693268	2.71E-108	1.49E-105
C14orf132	-2.642845872	4.63603562	5.51E-108	3.01E-105
AC135012.3	-4.054936984	-1.976621587	7.87E-108	4.25E-105
SASH1	-1.869999078	5.46989739	7.94E-108	4.25E-105
BTNL9	-3.436810828	3.695808047	1.86E-107	9.86E-105
HID1-AS1	-2.795776155	-1.771458332	3.71E-107	1.95E-104
HIGD1B	-2.752928878	1.623385898	1.46E-106	7.61E-104
CD93	-2.213049419	6.99990878	4.86E-106	2.51E-103
TNS1	-2.181522768	8.438215184	6.83E-106	3.50E-103
CA4	-4.356162797	2.852457406	7.52E-106	3.82E-103
FREM3	-4.304504627	-0.833327313	1.15E-105	5.79E-103
WNT3A	-4.104853093	1.342839199	1.86E-105	9.31E-103
CD5L	-4.052216549	-0.902189984	3.24E-105	1.60E-102
NCKAP5	-3.535934556	3.612136662	6.98E-105	3.43E-102
ANOS1	-2.805386362	5.80310189	1.46E-104	7.13E-102
MIR3945HG	-3.383584683	-0.793516258	3.07E-104	1.48E-101
SLIT2	-2.49661359	5.248233263	1.31E-103	6.30E-101
CLEC4M	-4.465312034	-1.329296873	2.90E-103	1.38E-100
AL445307.1	-3.430086319	-2.888736375	8.93E-103	4.21E-100
RASIP1	-2.319055628	3.948533399	1.15E-102	5.37E-100
EFCC1	-2.592863308	2.735010212	1.40E-102	6.48E-100
PDLIM2	-1.982619673	4.476299624	2.24E-102	1.03E-99
OVCH1	-3.90686316	-0.506067542	2.74E-102	1.25E-99
CAT	-1.912589647	6.998865396	2.78E-102	1.26E-99
LMO2	-1.927876931	3.944737997	2.35E-101	1.06E-98
LINC00656	-3.486950952	-2.389119783	2.50E-101	1.12E-98
NMUR1	-2.691640661	0.827206513	2.66E-101	1.18E-98
KANK2	-1.646281242	6.726038129	1.09E-100	4.81E-98
SEMA6A	-2.585915493	3.682569591	1.86E-100	8.12E-98
ANKRD1	-4.455140585	3.686074159	2.26E-100	9.82E-98
AC093890.1	-2.753426933	-1.316016723	2.71E-100	1.17E-97
FEZ1	-2.153655538	3.330785005	5.09E-100	2.18E-97
SPTBN1	-1.757657683	8.938264366	7.83E-100	3.33E-97
MYOC	-4.554709771	-0.336131773	2.15E-99	9.06E-97
JPH4	-2.607672396	0.830426927	3.62E-99	1.52E-96
ARHGAP31	-2.145377221	5.767673928	4.56E-99	1.89E-96
AL109741.1	-2.523189808	-1.596128908	3.04E-98	1.26E-95
HEG1	-2.133884556	6.750643021	3.85E-98	1.58E-95
TENT5B	-2.809141502	3.299085948	1.36E-97	5.54E-95
DENND3	-1.768211859	5.874204737	3.12E-97	1.26E-94
HBEGF	-2.573668913	5.364390381	9.63E-97	3.87E-94
TNR	-3.876944213	0.603341555	1.02E-96	4.05E-94
SCN4B	-2.82206937	3.341281746	1.33E-96	5.26E-94
ADAMTS8	-3.52971019	3.403271548	1.38E-96	5.45E-94
CSF3	-4.680890285	3.316697271	3.23E-96	1.26E-93
AC104211.1	-2.952477626	-1.313024984	5.05E-96	1.96E-93
FHL5	-2.790927737	1.931327569	5.68E-96	2.19E-93
SIRPB1	-2.787361338	3.16522599	1.88E-95	7.20E-93
GLIPR2	-2.218277305	5.657751398	8.41E-95	3.20E-92
AC084880.1	-2.49075998	-0.654482886	8.67E-95	3.28E-92
TGFBR3	-2.599385455	4.670251795	1.20E-94	4.50E-92
LINC02016	-4.863795524	-0.960165551	1.53E-94	5.71E-92
FAM189A2	-2.869742663	4.486926739	3.33E-94	1.24E-91
RHOJ	-1.881702308	3.834928939	3.59E-94	1.32E-91
ARC	-3.455082676	1.393857565	9.75E-94	3.58E-91
GIMAP6	-2.097553025	4.982692629	1.01E-93	3.67E-91
FRMD3	-2.450427596	2.498610035	1.65E-93	5.97E-91
NLRC4	-2.090185641	2.615006267	2.75E-93	9.90E-91
CGNL1	-2.23190698	5.691025476	4.70E-93	1.68E-90
LINC01082	-3.744060897	-3.529813971	5.22E-93	1.86E-90
GPR146	-2.107808462	0.161896466	7.91E-93	2.80E-90
UPK3B	-4.16317768	4.824575181	8.35E-93	2.94E-90
PEAK1	-1.669037779	5.870900343	1.33E-92	4.65E-90
OR6K3	-4.070958271	-3.230521281	2.36E-92	8.19E-90
ADARB1	-1.778902727	4.860028953	3.67E-92	1.27E-89
DNASE1L3	-3.487486464	2.412479348	5.00E-92	1.72E-89
LINC01996	-4.430286209	-0.630488366	1.06E-91	3.63E-89
PELATON	-2.538383934	4.235702748	1.51E-91	5.12E-89
AC095050.1	-4.49535273	-2.878152675	1.58E-91	5.32E-89
DPP6	-3.262037482	0.0222353	2.67E-91	8.96E-89
GIMAP1	-2.045906033	3.046882518	3.73E-91	1.25E-88
THBD	-2.433383024	6.017433023	3.92E-91	1.30E-88
TCF21	-3.115512699	2.688186305	4.98E-91	1.64E-88
FAM110D	-2.315383093	1.25397118	3.57E-90	1.17E-87
CAVIN1	-2.069076196	8.039839831	3.65E-90	1.19E-87
AC084030.1	-4.167662845	-3.321706813	4.12E-90	1.34E-87
NDST1	-1.600199731	6.975460626	1.01E-89	3.28E-87
TMEM204	-1.922553589	4.507884843	3.60E-89	1.16E-86
GSTM5	-2.461457831	2.184545291	8.76E-89	2.80E-86
SSTR4	-3.889420984	-3.247480922	1.45E-88	4.62E-86
LTBP4	-2.227863584	7.127429983	1.73E-88	5.47E-86
TACC1	-1.856109859	7.080026434	3.09E-88	9.72E-86
CMTM2	-2.326649071	-0.929937328	5.72E-88	1.79E-85
PYCR1	3.687046076	6.374315693	1.00E-87	3.12E-85
PPP1R15A	-1.872509827	6.782105582	1.60E-87	4.95E-85
BMPR2	-1.360287102	7.00746637	2.26E-87	6.96E-85
NXPH3	-2.428892268	1.962128731	1.04E-86	3.18E-84
LMCD1	-1.764798092	5.401264598	1.06E-86	3.22E-84
JCAD	-2.099366923	6.010111742	1.10E-86	3.32E-84
OR6N1	-4.158452165	-3.241737235	6.14E-86	1.85E-83
KLF6	-1.798202823	7.83307421	7.90E-86	2.37E-83
C10orf67	-3.794417381	0.234739228	1.27E-85	3.79E-83
AC104984.4	-4.059799024	-2.456271132	1.35E-85	4.00E-83
AP001189.3	-2.488433868	-0.517885013	1.44E-85	4.26E-83
SLC4A1	-3.406171237	-1.988674329	1.72E-85	5.07E-83
ADPRH	-1.610761115	4.273599248	2.61E-85	7.64E-83
NPR1	-2.622553264	4.430494885	2.89E-85	8.43E-83
SH3GL3	-4.23559143	-0.035124864	4.62E-85	1.34E-82
AP001528.2	-2.417545426	1.027833932	5.10E-85	1.47E-82
AC128709.3	-4.284182723	-2.710780734	5.17E-85	1.48E-82
AC104984.1	-4.131856234	-3.07771725	5.74E-85	1.64E-82
AC026369.3	-3.345156442	0.174790743	6.01E-85	1.71E-82
AC125807.2	-2.152031212	1.823875491	9.25E-85	2.62E-82
AC018647.1	-2.491778588	-0.919032191	1.33E-84	3.76E-82
SPN	-2.286738441	5.086769006	1.36E-84	3.81E-82
CHRM1	-4.475223237	-0.590719214	1.66E-84	4.63E-82
TUBB1	-2.685009811	-0.280194948	1.69E-84	4.68E-82
CCDC85A	-2.770422928	0.539695094	5.17E-84	1.43E-81
LINC00551	-2.656889444	-0.259745793	1.03E-83	2.85E-81
RCAN1	-1.818099027	5.605974964	1.58E-83	4.33E-81
CASKIN2	-1.716990653	5.400286721	1.69E-83	4.61E-81
ADGRE3	-2.879229312	0.629872692	2.18E-83	5.88E-81
PNPLA6	-1.57708024	6.314836196	2.18E-83	5.88E-81
F8	-1.81900022	4.487054074	3.61E-83	9.72E-81
ASPA	-2.651471785	0.906917534	4.13E-83	1.11E-80
SNRK	-1.197883978	5.00456941	5.31E-83	1.42E-80
LDLR	-2.111268388	7.066129104	1.44E-82	3.81E-80
CDO1	-2.707234047	1.599347904	2.02E-82	5.33E-80
AL355835.1	-2.541234753	-1.762609717	3.55E-82	9.33E-80
RAI2	-2.13727764	3.778934302	6.81E-82	1.78E-79
ADAMTS1	-2.357761345	5.885889905	9.25E-82	2.41E-79
SESN1	-1.640317001	4.462351359	1.05E-81	2.72E-79
VWF	-2.323722722	8.23053873	1.14E-81	2.93E-79
LHFPL6	-1.721455283	5.169317074	1.72E-81	4.42E-79
CLDN5	-2.716708615	5.381655329	1.72E-81	4.42E-79
LAMP3	-2.785309621	7.45384695	1.76E-81	4.50E-79
IL3RA	-1.740526019	3.796570662	1.84E-81	4.68E-79
HBM	-3.852700703	-3.953491981	3.07E-80	7.77E-78
NOTCH4	-1.840148491	4.836884877	3.80E-80	9.57E-78
PTPN5	-3.417836397	-0.852361106	4.64E-80	1.16E-77
SEMA5A	-2.533786897	5.100384736	6.52E-80	1.63E-77
MYADM	-1.974085929	6.961074649	7.45E-80	1.85E-77
TIE1	-1.972986665	5.13929363	1.74E-79	4.31E-77
SLC19A3	-2.92373399	2.768267275	1.83E-79	4.51E-77
LINC00163	-3.409280278	-2.064085222	2.92E-79	7.17E-77
SYNM	-1.834202891	3.739945608	6.03E-79	1.47E-76
MGAT3	-3.022534863	3.999677472	8.98E-79	2.19E-76
ALKAL2	-3.079320102	0.674509358	9.45E-79	2.29E-76
ABI3BP	-2.519268052	5.426621937	1.74E-78	4.21E-76
VEGFD	-3.589126521	3.402175422	1.79E-78	4.30E-76
DPEP2	-2.18729072	2.523299292	1.79E-77	4.29E-75
PRKG2	-2.652531449	1.845562592	5.44E-77	1.30E-74
CASP12	-2.523075023	-1.266630145	5.98E-77	1.42E-74
AC067752.1	-3.726251539	-2.878884008	6.49E-77	1.54E-74
CD36	-2.909857325	5.620891431	9.94E-77	2.34E-74
LRRN3	-2.859973194	1.908269654	1.06E-76	2.48E-74
ABCA8	-2.875031861	3.939952227	1.53E-76	3.57E-74
SNX22	-2.273151644	2.475852063	1.56E-76	3.63E-74
PEAR1	-2.023047903	3.238523592	1.65E-76	3.82E-74
GRIA1	-3.735515052	2.031001932	1.74E-76	4.03E-74
CCDC141	-3.117759426	1.547072961	2.42E-76	5.57E-74
SERINC1	-1.177966368	7.791630457	3.37E-76	7.73E-74
MS4A7	-2.135894899	5.489522023	3.90E-76	8.92E-74
MFAP4	-2.658915918	7.054800284	5.40E-76	1.23E-73
TBX3	-2.138141726	3.902436286	7.28E-76	1.65E-73
GCOM1	-2.577608184	1.895814872	1.02E-75	2.31E-73
STX12	-1.051822065	6.231832943	1.17E-75	2.64E-73
PHACTR1	-2.21612326	3.155909376	1.24E-75	2.77E-73
SELP	-2.331213484	3.47894572	1.68E-75	3.76E-73
PLPP3	-1.405072809	5.916504269	1.75E-75	3.90E-73
UNC45B	-2.570199002	-1.05260683	1.78E-75	3.94E-73
FPR2	-3.006599922	2.523760419	2.52E-75	5.56E-73
CMTM5	-2.928646949	-2.579614656	2.64E-75	5.81E-73
AGRP	-3.082152165	-0.233323976	2.94E-75	6.44E-73
SPARCL1	-1.972270854	7.785051102	4.88E-75	1.07E-72
FGR	-2.116638331	4.942973364	5.99E-75	1.30E-72
AC004554.1	-2.759389549	-1.814562351	6.19E-75	1.34E-72
FAM162B	-2.310559814	1.730295736	9.05E-75	1.96E-72
PALMD	-2.066154117	4.04660595	1.52E-74	3.28E-72
TMEM88	-2.167083229	1.543194037	1.61E-74	3.45E-72
TRPV2	-1.885271564	4.859568164	1.92E-74	4.11E-72
PI16	-3.590212071	1.306935286	2.66E-74	5.66E-72
COX4I2	-2.290505753	2.538188531	5.12E-74	1.09E-71
AC027288.3	-3.197636101	1.365024805	8.80E-74	1.86E-71
TEDC2	3.503285843	2.614324513	1.18E-73	2.49E-71
TGFBR2	-1.67061355	7.85981486	1.63E-73	3.42E-71
AC087521.1	-2.655618895	-0.666168284	2.09E-73	4.36E-71
CD52	-2.383259249	5.54109937	2.43E-73	5.07E-71
CAV2	-2.345940846	7.022451628	3.28E-73	6.82E-71
ADCY4	-1.77794384	3.382246335	3.53E-73	7.31E-71
Z95114.3	-2.205294782	-1.054106516	3.80E-73	7.83E-71
OLR1	-2.553540059	5.75746933	3.82E-73	7.86E-71
IQSEC3	-2.590222442	1.420322195	4.45E-73	9.11E-71
COX7A1	-1.942560369	2.711598222	7.36E-73	1.50E-70
AC021016.1	-1.610918321	1.271397952	7.42E-73	1.51E-70
HTR3C	-4.552726894	-1.087427345	8.08E-73	1.64E-70
ELAPOR2	-2.112488928	4.706158054	9.42E-73	1.90E-70
MIR22HG	-1.602269889	4.491678059	9.98E-73	2.01E-70
ADRB1	-3.180543586	2.806824728	1.20E-72	2.40E-70
ITLN2	-4.643515169	2.008323881	2.73E-72	5.47E-70
GRIK4	-2.512607882	0.17546181	3.54E-72	7.05E-70
SLC14A1	-2.836694345	1.843005413	7.30E-72	1.45E-69
QKI	-1.364671527	6.952725044	8.62E-72	1.71E-69
WFS1	-1.738680227	6.025607454	1.12E-71	2.21E-69
BCL6B	-1.764027481	4.075001401	1.20E-71	2.36E-69
FLI1	-1.693265197	4.800876773	1.23E-71	2.41E-69
DKK2	-2.310630582	2.561295146	1.67E-71	3.26E-69
GDF10	-3.204783251	2.643581082	1.94E-71	3.78E-69
LRRC2	-2.488814979	0.628926425	2.09E-71	4.06E-69
ACTN2	-2.822487926	0.323409048	2.24E-71	4.34E-69
LGI3	-4.268633057	3.858911593	2.30E-71	4.43E-69
MASP1	-2.709724444	2.126049784	4.44E-71	8.54E-69
SERTM1	-4.806566382	1.395998497	6.66E-71	1.28E-68
AL390755.1	-2.812083837	-1.649228912	9.05E-71	1.73E-68
KIF17	-2.003279725	1.485866097	1.39E-70	2.64E-68
SFTPC	-4.727460194	11.88086506	1.51E-70	2.86E-68
AGTPBP1	-1.235473644	4.439285303	1.96E-70	3.70E-68
APOLD1	-2.032021438	4.836188009	2.03E-70	3.84E-68
PKNOX2	-2.447983197	2.406485311	2.65E-70	4.99E-68
TGM1	-2.447417584	1.775059021	2.88E-70	5.41E-68
METTL7A	-1.906167227	6.617492076	3.13E-70	5.85E-68
ITM2A	-2.045955776	4.655392454	3.24E-70	6.04E-68
GYPC	-1.763350155	4.612874651	3.39E-70	6.29E-68
AFAP1L1	-1.701346724	4.134371258	3.73E-70	6.90E-68
LIN7A	-2.558468549	2.732671306	3.91E-70	7.21E-68
MPIG6B	-2.226336445	-0.727925653	4.10E-70	7.54E-68
ACADL	-3.142348183	2.766376226	4.11E-70	7.54E-68
VSIR	-1.605778646	5.979048374	4.41E-70	8.07E-68
PLCL1	-1.772436998	2.493729498	4.84E-70	8.82E-68
AL512603.2	-2.526108944	-3.060751473	8.02E-70	1.46E-67
RS1	-3.959946407	-0.488237074	9.07E-70	1.64E-67
SYNPO2L	-2.667611817	-0.594364868	9.15E-70	1.65E-67
ANGPTL7	-3.719839752	-0.656299926	9.28E-70	1.67E-67
CXCR2	-2.603828297	1.478615725	1.04E-69	1.87E-67
ADAMTS7P3	-3.528308516	1.316760049	1.21E-69	2.17E-67
DES	-3.074297802	4.027234177	1.23E-69	2.19E-67
PTPRN2-AS1	-2.195911467	0.110882086	1.38E-69	2.46E-67
GLDN	-2.540454004	3.252641225	1.80E-69	3.18E-67
FXYD6	-1.872199949	2.891150428	1.96E-69	3.47E-67
TSPAN18	-2.013960523	4.49077218	4.38E-69	7.72E-67
PPM1F	-1.285161066	5.110296011	6.64E-69	1.17E-66
IQGAP3	3.603099618	4.940988102	6.90E-69	1.21E-66
NCAPGP2	-4.057201225	-3.113907848	1.19E-68	2.08E-66
AC007861.1	-3.022224182	-3.627819739	4.47E-68	7.78E-66
CBX7	-1.659308519	4.888161798	4.74E-68	8.23E-66
FO681492.1	-2.863266853	0.881853267	5.49E-68	9.52E-66
CNTN6	-3.482301745	1.790732717	6.97E-68	1.20E-65
ABCG2	-2.056165506	2.750562679	9.05E-68	1.56E-65
SLC25A25	-1.661833511	4.840907402	9.27E-68	1.59E-65
RNF144B	-1.709185412	5.468176915	1.06E-67	1.81E-65
RNU6-529P	-2.053010103	-2.252058631	1.34E-67	2.29E-65
FAM83A	6.825608175	7.187508683	1.49E-67	2.53E-65
ETV4	3.847881579	5.499907701	1.61E-67	2.73E-65
RAPGEF4	-1.854785404	2.796327377	1.89E-67	3.20E-65
AMOTL1	-1.76625486	5.630923189	1.92E-67	3.24E-65
KLF9	-1.695449405	6.153713478	2.91E-67	4.90E-65
SPRYD7	-1.284228485	4.079622713	5.43E-67	9.12E-65
GNAQ	-1.200644865	6.721779172	6.03E-67	1.01E-64
SULT1C4	-2.261501036	2.605220083	7.82E-67	1.31E-64
HPS5	-1.136243623	5.187228917	1.74E-66	2.90E-64
LGALSL	-1.844772249	4.757005592	1.98E-66	3.29E-64
IGSF10	-2.856860861	3.450587562	2.02E-66	3.34E-64
SLIT3	-2.481012721	5.327071658	2.41E-66	3.98E-64
RASGRP4	-1.945238903	2.018939693	3.35E-66	5.52E-64
INKA2	-1.618542722	3.059834479	4.16E-66	6.82E-64
MAMDC2	-2.705449789	3.800112088	4.89E-66	8.01E-64
DACH1	-2.496587831	2.581875403	6.48E-66	1.06E-63
SYNPO	-1.732558611	7.265676226	6.50E-66	1.06E-63
LINC01936	-2.397508158	2.366041279	6.58E-66	1.07E-63
LINC01197	-2.125405809	-0.220701954	6.70E-66	1.08E-63
TOP2A	3.849284508	6.925072387	7.67E-66	1.24E-63
DIPK2B	-1.777357519	4.066299859	8.67E-66	1.40E-63
MARCO	-3.013016846	6.738020469	1.81E-65	2.90E-63
FERMT2	-1.424535341	5.844490426	2.26E-65	3.62E-63
MSR1	-2.306525569	6.54651713	2.63E-65	4.20E-63
COL6A6	-2.847402541	3.74228095	3.09E-65	4.92E-63
PCDH12	-1.704458854	4.602448828	3.37E-65	5.36E-63
DLC1	-2.254497615	6.842188226	4.00E-65	6.35E-63
JDP2	-1.464133287	5.154469059	4.50E-65	7.11E-63
GFOD1	-1.820632264	3.46989353	6.90E-65	1.09E-62
AC108053.1	-2.379392625	-0.514215387	8.19E-65	1.29E-62
DOCK4	-1.565593337	5.144207309	1.07E-64	1.67E-62
TNXB	-2.731744412	5.318875589	1.34E-64	2.10E-62
KCNA4	-3.912814166	-0.505609999	1.38E-64	2.15E-62
OSCAR	-2.230078151	4.082992806	1.79E-64	2.78E-62
GOLM1	2.637318382	8.224708453	1.81E-64	2.82E-62
ODF3L1	-2.373315013	-0.278508746	2.16E-64	3.34E-62
TBX2	-1.91663873	5.058047596	3.54E-64	5.46E-62
PRAM1	-2.167470202	2.968209451	3.60E-64	5.54E-62
IQCN	-2.477188723	3.258610387	3.77E-64	5.79E-62
OTC	-3.641057219	-2.157895914	4.58E-64	7.02E-62
C1orf162	-1.828098005	4.740394233	5.92E-64	9.04E-62
SAPCD2	3.77581299	3.345553633	7.41E-64	1.13E-61
UBE2T	3.296510929	4.238271693	7.52E-64	1.14E-61
ARHGEF39	2.712348902	2.55898901	1.04E-63	1.57E-61
RECK	-1.580645679	3.765237657	1.43E-63	2.16E-61
AC022613.2	-1.550490634	-0.716374574	1.61E-63	2.42E-61
TMEM184A	3.118108839	5.417638876	2.23E-63	3.35E-61
CORO2B	-2.198632282	2.152433154	2.25E-63	3.37E-61
AC006273.1	-2.608331407	-1.81943133	2.60E-63	3.89E-61
SELE	-2.93533052	2.36823749	2.62E-63	3.91E-61
C20orf194	-1.285372022	4.740055779	2.85E-63	4.25E-61
AC009806.1	-2.352477243	-2.671919588	3.75E-63	5.58E-61
LINC01352	-2.300073005	-1.748380472	6.17E-63	9.14E-61
GIMAP7	-1.819854429	4.101408784	7.57E-63	1.12E-60
LINC01290	-2.234711862	-1.545980437	8.79E-63	1.30E-60
DCC	-2.636575323	1.092547679	8.91E-63	1.31E-60
ERCC6L	3.272558731	2.23153141	1.32E-62	1.94E-60
MSRB3	-1.860746461	4.94787074	1.35E-62	1.98E-60
FAM124B	-1.875018119	1.136151082	1.58E-62	2.31E-60
ADAMTSL3	-2.312084361	3.307564607	1.68E-62	2.45E-60
AC004947.1	-3.026732769	-1.009883516	1.81E-62	2.63E-60
KCNT2	-2.602362459	1.625770804	2.20E-62	3.18E-60
RPL13AP17	-3.984497556	1.549602728	2.82E-62	4.07E-60
ANGPT1	-2.304195778	4.085284912	2.84E-62	4.09E-60
C5AR1	-1.969993426	5.155783498	2.84E-62	4.09E-60
AL445423.1	-2.374995224	-2.41808994	3.92E-62	5.62E-60
AL008729.2	-2.009504478	2.245273481	4.22E-62	6.04E-60
SIGLEC11	-2.433484665	0.095052051	5.10E-62	7.29E-60
CDC25C	3.670698961	2.172030702	5.88E-62	8.38E-60
P2RY1	-1.774139622	3.041387769	6.36E-62	9.04E-60
ADGRE1	-2.651424129	1.878905044	9.30E-62	1.32E-59
CASS4	-1.911895592	3.223684829	1.39E-61	1.97E-59
KLF4	-2.287495048	5.646496543	1.53E-61	2.16E-59
DAPK2	-1.950138213	4.688654231	1.55E-61	2.18E-59
AC010776.3	-3.81035383	-3.694408887	1.76E-61	2.47E-59
TOM1L2	-1.377726641	5.799288572	1.76E-61	2.47E-59
AC010976.2	-3.000822351	-1.139377436	2.14E-61	2.99E-59
LINC01447	-2.940989741	-2.891927778	2.32E-61	3.24E-59
ADH1B	-3.295203554	6.492036568	2.46E-61	3.42E-59
AL162595.1	2.154545784	4.046251019	2.54E-61	3.52E-59
VSIG4	-2.388346432	6.275563157	3.29E-61	4.56E-59
AC104237.3	-3.486139259	-2.896797015	3.59E-61	4.96E-59
AC096921.2	-1.821012171	0.531666929	4.00E-61	5.52E-59
ADM2	3.454683439	4.088309081	4.17E-61	5.74E-59
PTCRA	-2.442265374	-0.401432927	4.27E-61	5.86E-59
KLF13	-1.394936552	6.842174856	4.62E-61	6.32E-59
ITPRIP	-1.660864761	5.126849013	4.64E-61	6.34E-59
ESAM	-1.945720144	5.956024355	4.94E-61	6.73E-59
RBMS2	-1.254363943	6.328077539	6.75E-61	9.17E-59
FAM83A-AS1	6.526834065	2.23987407	7.69E-61	1.04E-58
ALDH18A1	1.614711501	6.807339771	8.44E-61	1.14E-58
KIF14	3.729312568	3.316386618	8.61E-61	1.16E-58
CD34	-1.673400977	5.949937276	1.03E-60	1.39E-58
PTPRQ	-3.616332159	0.615343943	1.11E-60	1.49E-58
KIF4A	3.815833274	4.278523804	1.11E-60	1.49E-58
AC010776.2	-3.762560895	-3.041275006	1.19E-60	1.60E-58
XRCC2	3.212456848	2.758880193	1.22E-60	1.63E-58
B3GNT3	4.3629102	5.603977698	1.42E-60	1.90E-58
Z99129.4	-1.533834896	3.0509477	1.63E-60	2.17E-58
PLA2G4F	-2.712451701	4.580208943	1.93E-60	2.57E-58
AC131649.2	-2.705062895	2.15555967	2.13E-60	2.81E-58
ANGPTL1	-2.43109688	2.013711786	2.70E-60	3.57E-58
AC011511.5	-2.850844812	-0.821972109	2.71E-60	3.57E-58
CD300C	-2.093775725	2.287964774	2.81E-60	3.69E-58
GPX3	-2.274294846	8.260961887	3.47E-60	4.56E-58
SFXN1	1.50100925	5.588860902	3.84E-60	5.03E-58
LINC02014	3.894588314	-0.049433534	5.02E-60	6.55E-58
ANO2	-2.167590986	0.15050867	5.35E-60	6.97E-58
RSPO1	-3.107401113	0.700194573	5.50E-60	7.15E-58
CPED1	-2.007270054	3.896812142	7.51E-60	9.74E-58
UHRF1	3.351527711	3.970796611	8.04E-60	1.04E-57
ASPM	3.69057294	4.458975274	8.68E-60	1.12E-57
ITGA8	-2.119623083	4.569414196	8.75E-60	1.13E-57
MYH2	-3.115374532	-1.612642315	9.18E-60	1.18E-57
ORC6	3.02847003	2.942316257	1.04E-59	1.33E-57
SSMEM1	-2.948167317	-3.981041862	1.11E-59	1.43E-57
STIL	2.54187465	3.711418938	1.15E-59	1.47E-57
S100A3	-2.351817129	1.396769962	1.16E-59	1.48E-57
EZH2	2.529275778	4.374881364	1.25E-59	1.59E-57
LINC00987	-1.75540021	-0.380870916	1.36E-59	1.72E-57
PDZD2	-2.260643848	5.190901123	1.44E-59	1.83E-57
HAS1	-3.37000037	0.821308838	1.76E-59	2.22E-57
RASGEF1B	-1.464336797	4.767736719	1.92E-59	2.42E-57
ZNF366	-1.965414675	1.487404557	1.94E-59	2.44E-57
MMRN1	-2.37617559	3.758632891	2.35E-59	2.95E-57
CALCOCO1	-1.229394497	6.464219652	2.45E-59	3.07E-57
PHACTR2	-1.514462314	5.515998573	2.76E-59	3.45E-57
E2F8	3.158459283	2.927563104	2.88E-59	3.60E-57
SH2D4B	-2.248778562	-1.281595192	2.94E-59	3.66E-57
GAB1	-1.382191529	4.857710987	4.15E-59	5.16E-57
CXCR1	-2.866934534	0.724559949	4.36E-59	5.41E-57
SYNC	-1.847894503	1.30904631	5.04E-59	6.24E-57
SOSTDC1	-3.736578824	2.702533353	5.43E-59	6.71E-57
RNU6-955P	-3.585386327	-4.07444901	6.37E-59	7.86E-57
ADGRL2	-1.901501603	5.713606181	6.73E-59	8.29E-57
NEK2	3.724707309	3.961148035	7.16E-59	8.80E-57
KIAA0040	-1.269941332	5.846285348	7.98E-59	9.78E-57
SEPTIN4	-1.507215892	3.238141794	8.10E-59	9.90E-57
KIF1C	-1.317212772	7.297385552	8.22E-59	1.00E-56
ZNF106	-1.30883508	6.328236938	8.76E-59	1.07E-56
PDE5A	-1.665354896	4.58749848	1.12E-58	1.36E-56
AL355499.1	-3.24394179	-2.620349823	1.15E-58	1.39E-56
LINC01977	4.703896497	1.224443257	1.30E-58	1.57E-56
AC069360.1	-2.426880517	-0.944553216	1.50E-58	1.81E-56
GPM6B	-1.991820039	3.636369908	1.62E-58	1.95E-56
SYT15	-2.501712211	-0.254591812	1.70E-58	2.05E-56
LINC01506	-2.463443429	-2.372367282	1.75E-58	2.10E-56
CENPF	3.474801398	5.729792355	1.97E-58	2.36E-56
MTMR10	-1.146777874	4.659629898	2.11E-58	2.52E-56
AC104237.2	-3.452573178	-3.213918104	2.40E-58	2.87E-56
RILPL2	-1.316709683	4.930056097	2.46E-58	2.93E-56
LRRC36	-2.942105439	2.706597659	2.46E-58	2.93E-56
HJURP	3.838556281	3.971279447	3.58E-58	4.25E-56
CASQ2	-2.766545454	0.700613579	4.82E-58	5.70E-56
KCNAB1	-1.700062504	1.905115482	5.48E-58	6.47E-56
IL6	-2.836707081	3.487951093	5.54E-58	6.54E-56
LGR4	2.706916112	6.165827049	5.74E-58	6.75E-56
TMEM47	-1.755137363	4.662590023	5.77E-58	6.77E-56
AHNAK	-1.923637336	9.804840146	6.66E-58	7.81E-56
GATA2	-1.88392992	4.063101189	7.51E-58	8.79E-56
AC022509.2	-3.022841691	-1.426026155	8.00E-58	9.34E-56
SRPK1	1.592276407	5.508553523	8.14E-58	9.48E-56
SPAG5	3.081715362	4.697616012	9.80E-58	1.14E-55
CHRNA2	-3.608348009	-2.164093788	1.00E-57	1.16E-55
KIF20A	3.146327417	4.291270536	1.05E-57	1.22E-55
CFD	-2.364003144	5.162084421	1.06E-57	1.23E-55
SYNE3	-1.74905145	3.640371665	1.09E-57	1.25E-55
AC110611.2	-1.723629177	-0.246524978	1.13E-57	1.31E-55
EPM2A	-1.192446357	2.352373872	1.22E-57	1.40E-55
PLEKHN1	3.1286069	2.894667221	1.22E-57	1.40E-55
AC109642.1	-2.674521426	-3.002613956	1.26E-57	1.44E-55
KIF26B	3.121056125	5.560135298	1.27E-57	1.45E-55
AC019193.2	-2.302656554	-2.629392015	1.43E-57	1.63E-55
CD83	-1.706369086	5.125626006	1.91E-57	2.18E-55
TBX4	-2.193607917	3.786517582	2.31E-57	2.63E-55
ST6GALNAC5	-2.179395947	3.591893703	2.72E-57	3.07E-55
ARL13B	-1.093445404	3.84093018	2.92E-57	3.30E-55
AL354714.1	-3.88679971	-1.764607752	3.55E-57	3.99E-55
DPYSL2	-1.578759441	7.60388506	3.55E-57	3.99E-55
PDK4	-2.428721409	6.187765851	3.62E-57	4.06E-55
MFNG	-1.541419463	4.381318081	3.71E-57	4.16E-55
VEPH1	-2.627616878	4.40031775	3.84E-57	4.29E-55
BUB1B	3.410235656	3.589189635	4.08E-57	4.56E-55
NHSL1	-1.76107806	4.92080046	4.39E-57	4.90E-55
FGFBP2	-3.11419023	0.374877036	5.44E-57	6.05E-55
HSPB8	-1.987966723	5.186843579	5.73E-57	6.36E-55
EEF1A1P6	-1.982815646	4.155866848	7.95E-57	8.82E-55
TBX2-AS1	-2.05745133	0.533984478	8.09E-57	8.95E-55
LINC02154	-3.368791687	0.487793202	8.96E-57	9.88E-55
ENG	-1.616465785	7.271603113	1.05E-56	1.15E-54
LINC01863	-3.234636901	-1.990712012	1.06E-56	1.16E-54
LATS2	-1.211150591	5.022079915	1.18E-56	1.30E-54
MEX3A	4.174521972	4.915270499	1.30E-56	1.43E-54
DLGAP5	3.665828242	4.060678752	1.59E-56	1.73E-54
AL355304.1	-2.275565194	-0.998641862	1.65E-56	1.80E-54
PCDH17	-1.708915623	4.704433968	1.74E-56	1.89E-54
ACP5	-1.82270437	7.131763376	2.72E-56	2.96E-54
NUF2	3.686578569	3.675469817	2.80E-56	3.04E-54
C2orf91	-2.929895068	-0.62232665	2.85E-56	3.08E-54
WASF3	-1.900397385	2.591330685	3.67E-56	3.97E-54
RNU6-967P	-3.717625825	-4.30335511	4.33E-56	4.66E-54
CDC6	3.418370618	4.454911059	6.25E-56	6.71E-54
TIMP3	-1.960668604	9.298330733	6.55E-56	7.03E-54
PPAT	1.910147607	4.30242184	6.88E-56	7.37E-54
CCL23	-2.500945848	0.846426441	7.59E-56	8.12E-54
KIF2C	3.558328078	4.409923799	7.77E-56	8.29E-54
CTXND1	-3.131245183	1.416784491	8.14E-56	8.67E-54
GP9	-3.099912927	-2.714540129	9.06E-56	9.63E-54
AC011899.2	-2.172331218	-1.672046356	1.29E-55	1.37E-53
TMEM177	1.567009196	3.521455081	1.41E-55	1.50E-53
ZBED2	-2.373499053	2.763559223	1.54E-55	1.63E-53
SPTBN2	2.508029963	6.088224301	1.79E-55	1.89E-53
MYL9	-1.719621527	7.659624464	1.98E-55	2.09E-53
DEPDC1B	3.598040629	2.917458338	2.85E-55	2.99E-53
ADRA1A	-3.455994895	-0.396442169	2.97E-55	3.11E-53
EXO1	3.584356205	3.268454633	3.21E-55	3.36E-53
DNASE2B	-2.9023396	0.166799098	3.86E-55	4.03E-53
SPAG4	2.882571053	3.978304671	3.88E-55	4.05E-53
PLK1	3.193189583	4.370713564	4.02E-55	4.18E-53
EFNA4	2.199104385	4.105465905	4.10E-55	4.26E-53
LINC00702	-2.15335153	1.139921064	4.30E-55	4.46E-53
ANLN	3.771176962	5.537402746	4.37E-55	4.52E-53
CNRIP1	-1.498605734	3.178448516	5.04E-55	5.21E-53
EP300-AS1	-1.823773235	-0.399767244	5.89E-55	6.08E-53
AP000438.1	-2.83195654	-3.396317832	6.21E-55	6.39E-53
LGI4	-1.686057319	1.323385646	6.43E-55	6.61E-53
TUBB3	4.428783697	0.461304946	7.48E-55	7.68E-53
IL7R	-2.04973936	6.306430299	7.53E-55	7.71E-53
CDC20	3.757884436	5.121656202	7.81E-55	7.99E-53
CCN5	-2.184008045	3.932309985	7.97E-55	8.14E-53
MMP19	-2.040353978	4.647212909	9.39E-55	9.58E-53
MYO19	1.636211372	5.436099246	1.04E-54	1.06E-52
FGF10	-3.029322159	0.611813359	1.12E-54	1.14E-52
ST6GALNAC3	-1.970712672	1.970350623	1.16E-54	1.18E-52
ACKR4	-2.431243587	0.96250133	1.25E-54	1.27E-52
A2M	-1.884167619	10.3822896	1.27E-54	1.29E-52
MELK	3.606609205	3.975217717	1.31E-54	1.32E-52
DIXDC1	-1.28738846	4.273332867	1.39E-54	1.40E-52
AC112206.2	-2.8479977	0.514984891	1.42E-54	1.43E-52
MVB12B	-1.536768028	4.941822147	1.47E-54	1.48E-52
EML1	-1.701436338	3.989363947	1.60E-54	1.60E-52
S1PR4	-1.810842635	2.974526755	1.67E-54	1.67E-52
GINS1	3.017520124	3.948131672	1.84E-54	1.84E-52
LINC00511	3.11201695	4.63912189	1.86E-54	1.86E-52
PAICS	1.852589232	7.038017017	1.88E-54	1.87E-52
CXCL2	-2.43009117	5.766625858	2.05E-54	2.04E-52
PLAC9P1	-2.697836471	-3.575833787	2.13E-54	2.11E-52
AC119424.1	-3.450586674	-2.953496897	2.84E-54	2.82E-52
DUOX1	-2.584045087	6.060219623	3.40E-54	3.37E-52
CTHRC1	3.782407661	6.170284296	3.64E-54	3.60E-52
KIF18B	3.764054302	3.690261094	3.97E-54	3.92E-52
PIP5K1B	-2.259391987	3.58934273	4.00E-54	3.94E-52
ACE	-1.727259674	5.421848607	4.06E-54	3.99E-52
HSPB6	-2.532123523	1.547680191	4.37E-54	4.28E-52
TROAP	3.784037483	3.621725633	6.52E-54	6.38E-52
FOSB	-3.286584268	7.597388154	7.65E-54	7.48E-52
RECQL4	3.015939211	4.348652742	8.48E-54	8.28E-52
KCNA5	-2.302701158	-0.015563293	9.10E-54	8.86E-52
AL121933.2	-2.246556139	1.096764697	1.14E-53	1.11E-51
ZNF423	-1.823867639	2.247567657	1.29E-53	1.25E-51
PDE2A	-1.785687131	2.908986563	1.62E-53	1.57E-51
DEPDC1	3.753587578	3.281121819	1.91E-53	1.85E-51
AFAP1-AS1	6.296313338	5.986002274	2.15E-53	2.07E-51
SGO1	3.188027422	1.699067872	2.45E-53	2.36E-51
RFX2	-1.68037859	4.148524272	3.14E-53	3.02E-51
SCN7A	-2.40947683	4.671559018	3.30E-53	3.17E-51
CDCA8	3.030964142	4.283525495	3.38E-53	3.25E-51
AC009951.6	-1.977961727	-2.354136135	3.51E-53	3.37E-51
ALOX5	-1.839183705	6.092276272	3.64E-53	3.48E-51
ZFYVE9	-1.301986702	4.577644869	3.71E-53	3.54E-51
C1QTNF7	-2.448826445	2.477691249	3.86E-53	3.68E-51
PRKCH	-1.088440942	5.129184657	4.81E-53	4.58E-51
AC068700.1	-2.346741754	-1.257091829	5.31E-53	5.05E-51
FGFR4	-2.473054161	4.499562018	5.33E-53	5.06E-51
STARD9	-1.776773081	3.673850912	6.16E-53	5.83E-51
ARAP3	-1.356437528	4.550315519	8.88E-53	8.40E-51
PTPRD-AS1	-2.254185604	-0.812586744	1.04E-52	9.84E-51
RMI2	2.265124694	3.940742014	1.16E-52	1.09E-50
AC007877.1	-1.794366884	-1.247836999	1.21E-52	1.13E-50
AC017104.5	-2.466800103	-2.557813035	1.35E-52	1.27E-50
ECEL1P2	-3.186540145	1.158460562	1.37E-52	1.29E-50
DOK2	-1.877145554	4.466841647	1.87E-52	1.75E-50
C10orf88B	3.489221731	0.359316729	1.95E-52	1.83E-50
SKA3	3.186325343	2.829568212	2.36E-52	2.20E-50
CEP55	3.245937447	4.543355108	2.49E-52	2.32E-50
TPX2	3.63332821	5.826481443	2.64E-52	2.45E-50
DENND2A	-1.768835492	3.542321163	2.95E-52	2.74E-50
GAS6	-1.710411466	6.66632169	3.15E-52	2.92E-50
GUCY1A2	-2.016083589	4.085037031	3.20E-52	2.96E-50
SYN3-AS1	-3.399800511	-3.416973469	3.24E-52	3.00E-50
SMIM41	-2.199278604	-2.199935259	3.27E-52	3.02E-50
PLSCR4	-1.452130595	4.841561719	3.31E-52	3.05E-50
TMCO2	-2.620200212	-3.729009483	3.64E-52	3.35E-50
PPP1R14A	-1.960372587	3.373057966	3.97E-52	3.65E-50
AL355499.2	-3.494870378	-3.904536954	4.66E-52	4.27E-50
EMP1	-1.78033482	7.519422838	5.25E-52	4.81E-50
FRMD4A	-1.320392516	3.707782612	5.74E-52	5.25E-50
AC026992.2	-2.716368924	-0.085709165	6.17E-52	5.63E-50
FFAR4	-2.385080582	2.053246588	6.40E-52	5.84E-50
HACD4	-1.459948677	4.659777939	6.43E-52	5.85E-50
UBE2C	4.173958676	5.268023521	8.25E-52	7.50E-50
GADD45B	-1.768117633	6.324060202	8.63E-52	7.83E-50
MNX1-AS1	5.151643111	0.720342352	8.71E-52	7.89E-50
FUT2	3.177327525	4.530932738	1.00E-51	9.05E-50
RASL12	-1.609550559	3.916357145	1.02E-51	9.25E-50
KNTC1	2.089849056	4.883898764	1.14E-51	1.03E-49
FIBIN	-2.162313036	3.755322882	1.42E-51	1.28E-49
CCNB1	2.970956949	5.370622315	1.47E-51	1.32E-49
CDCA3	3.262166832	3.42169481	1.50E-51	1.35E-49
POLQ	3.261830678	2.675562151	1.65E-51	1.48E-49
FRMD5	3.549048299	2.924452168	1.70E-51	1.52E-49
SLC1A1	-2.199421029	4.82217953	1.73E-51	1.55E-49
KIF11	2.683865005	4.729291051	1.75E-51	1.56E-49
AL035409.2	-2.378660984	-1.793313988	1.89E-51	1.69E-49
BIRC5	3.665351542	5.351117917	2.13E-51	1.89E-49
INPP5K	-1.110294718	5.560938421	2.15E-51	1.90E-49
AC068870.2	-1.33095986	0.415693874	2.24E-51	1.98E-49
BRIP1	2.676812028	2.977817661	2.52E-51	2.23E-49
AL135960.1	-2.510741377	-1.847568408	2.68E-51	2.36E-49
ABHD6	-1.279839919	3.244833092	3.58E-51	3.16E-49
GTSE1	3.090308108	3.440198276	4.07E-51	3.58E-49
TMPRSS4	4.817496113	6.939315759	4.30E-51	3.78E-49
LMOD1	-1.838826201	4.143715947	4.42E-51	3.88E-49
MBNL1-AS1	-1.819404553	1.915773483	5.83E-51	5.10E-49
MRC1	-2.313720903	7.12557096	6.18E-51	5.40E-49
LINC00891	-2.441193417	-1.414015684	6.24E-51	5.45E-49
LOXHD1	-2.208351455	-0.445823237	6.29E-51	5.48E-49
CKAP2L	3.155401878	3.256213634	7.69E-51	6.69E-49
PCDHGB7	-1.770586851	2.082328112	7.70E-51	6.69E-49
UTRN	-1.40719086	7.111871784	8.05E-51	6.98E-49
RAD54L	3.115506644	2.146230012	9.78E-51	8.47E-49
CBLC	3.201494898	4.313087255	1.08E-50	9.34E-49
SORBS1	-1.603302242	4.936225906	1.08E-50	9.34E-49
CCNB2	3.029201142	4.332755451	1.10E-50	9.48E-49
JAML	-1.791024926	5.014576684	1.20E-50	1.03E-48
OLFML1	-1.644819465	3.61921923	1.40E-50	1.20E-48
EFNA3	3.018173231	2.082812107	1.74E-50	1.50E-48
SYNPO2	-1.85791776	4.52444593	2.20E-50	1.89E-48
MDGA1	-1.892530214	3.028427301	2.25E-50	1.93E-48
MAFF	-1.516024408	5.134094957	2.42E-50	2.07E-48
LINC01624	-2.314850376	-2.561353131	2.55E-50	2.18E-48
FXYD1	-2.591198202	-3.447521375	2.65E-50	2.26E-48
CD300H	-2.257345273	-1.906215243	2.74E-50	2.34E-48
SHANK3	-1.439529865	4.889601214	3.32E-50	2.82E-48
C1orf198	-1.229135395	7.034374191	3.34E-50	2.84E-48
HELLS	2.341828957	3.922129806	3.38E-50	2.87E-48
FRY	-1.529356012	5.298915424	3.66E-50	3.10E-48
COL10A1	4.614095889	5.99181213	4.12E-50	3.47E-48
C1orf112	1.716304972	3.075183683	4.25E-50	3.58E-48
RCC1	1.7398057	6.02990165	4.44E-50	3.74E-48
MCM10	3.528276747	3.225415624	4.60E-50	3.87E-48
MT1M	-2.780268237	2.50291699	4.95E-50	4.16E-48
ZWINT	2.595824114	4.966119751	5.27E-50	4.42E-48
AC112482.2	-3.376180578	-3.382483784	5.29E-50	4.43E-48
RRM2	3.195081348	5.772647086	5.46E-50	4.56E-48
ABCA12	5.39156595	3.738472023	7.01E-50	5.85E-48
LIMCH1	-1.621449799	7.584195478	7.23E-50	6.03E-48
SRGAP2C	-1.153440516	2.702210753	7.88E-50	6.56E-48
EPHA10	3.620608622	3.574016154	8.62E-50	7.16E-48
RNF122	-1.351457971	3.582386357	1.02E-49	8.45E-48
RAB40A	-1.735885522	0.3374624	1.05E-49	8.66E-48
HLA-E	-1.348648445	10.06903922	1.24E-49	1.03E-47
ARHGEF6	-1.440135193	4.966041965	1.60E-49	1.32E-47
PPP1R14B	2.06601358	6.559665902	1.74E-49	1.43E-47
KRT79	-3.123219541	-1.158406351	1.77E-49	1.46E-47
MYH10	-1.521928144	7.015544257	1.79E-49	1.47E-47
STX1A	3.08695267	3.917794038	1.85E-49	1.52E-47
IGSF9	3.249261426	4.807536007	2.12E-49	1.74E-47
AC027288.2	-3.06545923	-0.843006938	2.56E-49	2.10E-47
CTNNAL1	-1.393841787	5.494540898	2.62E-49	2.14E-47
RASAL1	4.011974729	3.471180808	3.21E-49	2.62E-47
OCIAD2	2.188937433	6.831742424	3.31E-49	2.70E-47
MFAP3L	-2.087555446	2.4386304	3.35E-49	2.73E-47
GHR	-2.054898111	1.733513415	3.36E-49	2.73E-47
WFIKKN2	-3.054284228	-1.477738876	3.42E-49	2.77E-47
GPER1	-2.227027694	2.280653769	3.56E-49	2.89E-47
ANGPTL5	-2.495295236	-1.762155723	3.66E-49	2.96E-47
CENPA	3.601958733	2.696279038	3.81E-49	3.08E-47
LILRA5	-2.046179308	2.276480378	3.88E-49	3.13E-47
C1QTNF2	-1.874128931	0.909971121	4.00E-49	3.23E-47
AC093787.1	-4.01311558	-3.258853829	4.09E-49	3.29E-47
CRYAB	-1.985653262	3.886709078	4.34E-49	3.49E-47
C13orf46	-2.724975313	1.830723617	4.77E-49	3.83E-47
AC140479.2	4.073788741	0.68453333	5.07E-49	4.06E-47
JUND	-1.466882181	7.334286496	5.40E-49	4.33E-47
ZYG11A	5.351999524	1.675336284	5.74E-49	4.59E-47
DHH	-1.973781723	-0.891893667	5.80E-49	4.63E-47
AC004816.1	2.875070617	2.415221738	6.55E-49	5.22E-47
FERMT1	3.224749137	4.957099753	6.55E-49	5.22E-47
AC018529.1	-2.547792875	-2.79472605	6.73E-49	5.35E-47
SLC6A13	-2.657343486	-0.940945769	8.80E-49	7.00E-47
CDC45	3.186756773	3.396607427	8.83E-49	7.01E-47
PADI4	-2.544501888	-1.017020216	9.57E-49	7.58E-47
CAB39L	-1.406202736	3.930234076	1.06E-48	8.36E-47
EGR2	-1.863957959	4.251772618	1.23E-48	9.74E-47
TBX5-AS1	-1.799228015	2.812636556	1.48E-48	1.16E-46
CELSR3	3.376769705	4.1009444	1.52E-48	1.20E-46
NDC80	3.115188647	3.581788149	1.62E-48	1.28E-46
PRICKLE2	-1.415304766	4.026565904	1.64E-48	1.29E-46
TTK	3.279282715	3.402310052	1.77E-48	1.38E-46
AC044810.2	-3.210809846	-2.101536404	2.15E-48	1.68E-46
BCHE	-2.482431442	2.177035083	2.62E-48	2.05E-46
TMEM273	-1.583924651	3.865168468	2.94E-48	2.30E-46
HMGB3	3.483036985	8.170151498	2.97E-48	2.32E-46
MKI67	3.105796413	6.261981961	3.07E-48	2.39E-46
RADIL	-2.247128267	2.042332171	3.13E-48	2.44E-46
CFL2	-1.407759841	5.127873867	3.16E-48	2.45E-46
GPBAR1	-1.869882215	0.485873701	3.20E-48	2.48E-46
PACRG-AS3	-3.727026991	-1.756241124	3.84E-48	2.97E-46
SVEP1	-2.09134417	5.007084957	3.95E-48	3.05E-46
PTPRH	5.200732315	4.063903209	4.29E-48	3.31E-46
GPT2	3.399379908	6.162710459	4.43E-48	3.42E-46
ARHGAP24	-1.395365004	3.689467521	5.91E-48	4.55E-46
PCAT19	-2.070530523	3.267238122	5.95E-48	4.57E-46
BEND2	-2.982576692	-4.029445847	6.48E-48	4.98E-46
IQANK1	2.233749923	5.324269836	7.09E-48	5.43E-46
RHBDL2	2.683751773	3.172324081	7.21E-48	5.52E-46
DNA2	2.202622132	3.148267312	7.95E-48	6.08E-46
SIDT2	-1.10328406	6.104027402	8.46E-48	6.46E-46
PLPP2	2.417020726	6.448262519	8.79E-48	6.71E-46
AURKB	3.426825022	3.812920567	1.01E-47	7.69E-46
HYAL2	-1.245606313	6.178260821	1.17E-47	8.92E-46
HMMR	3.00958844	3.775377068	1.36E-47	1.03E-45
SLC11A1	-1.842737551	5.454663809	1.37E-47	1.04E-45
ANKS1A	-1.090890092	6.061788794	1.39E-47	1.05E-45
GIMAP4	-1.486302095	5.262284856	1.49E-47	1.13E-45
SLC24A4	-2.044976348	0.737058293	1.57E-47	1.19E-45
AQP4	-2.982033521	7.253169452	1.63E-47	1.23E-45
MAP3K3	-1.054005876	5.368066061	1.68E-47	1.27E-45
AC091305.1	-3.069603761	-3.098040589	1.70E-47	1.28E-45
LIPN	-2.537622186	-0.914887353	1.95E-47	1.47E-45
CNOT11	1.112897815	6.302981847	2.27E-47	1.71E-45
NTN4	-1.656620889	6.075840676	2.29E-47	1.72E-45
CYBRD1	-1.778394315	7.477413983	2.69E-47	2.02E-45
OR52K3P	-2.142625482	-0.498820399	2.78E-47	2.08E-45
DDX11-AS1	2.420340843	-0.261232394	2.80E-47	2.10E-45
PTH1R	-1.927848304	1.733394199	2.94E-47	2.20E-45
NCF2	-1.678443361	5.810833862	3.09E-47	2.30E-45
NDRG4	-2.060369448	3.672276773	3.10E-47	2.31E-45
KHDC4	1.448000688	5.785917266	3.65E-47	2.72E-45
CRABP2	5.579445421	7.507151173	3.85E-47	2.86E-45
NCAPH	2.959960996	3.917048902	4.28E-47	3.17E-45
DEPP1	-1.824096406	7.258760458	4.64E-47	3.44E-45
PID1	-1.945727789	4.393354821	5.49E-47	4.06E-45
SIRPD	-2.17721412	-2.833175917	5.49E-47	4.06E-45
EPB41L2	-1.4178337	5.75831202	6.01E-47	4.43E-45
CFP	-1.797808461	-0.680095488	6.08E-47	4.48E-45
AC116312.1	-2.786458871	-3.43299473	6.33E-47	4.66E-45
EPN3	3.073924971	4.054120104	8.65E-47	6.37E-45
SBSPON	-2.324853463	2.592348918	8.93E-47	6.56E-45
CDCA2	2.946661741	2.604177333	1.02E-46	7.47E-45
FOXM1	3.354333143	4.886228161	1.26E-46	9.23E-45
ALOX5AP	-1.942327698	5.850286066	1.29E-46	9.45E-45
RNU5B-4P	-2.093392383	-3.401246158	1.49E-46	1.09E-44
FOLR3	-3.303899993	0.214880322	1.64E-46	1.19E-44
RDM1	3.560860571	-0.155890505	1.67E-46	1.21E-44
PSAT1	3.479817621	4.817079916	1.71E-46	1.24E-44
EME1	2.67511202	1.613188856	1.71E-46	1.25E-44
ZFPM2-AS1	5.299122564	1.906748204	1.72E-46	1.25E-44
FAM13C	-1.748596164	1.568658825	1.84E-46	1.34E-44
KNL1	2.601421696	3.423639326	1.89E-46	1.37E-44
SLC5A9	-2.539938617	1.727422507	2.14E-46	1.55E-44
NCAPG	3.19519519	3.743310301	2.53E-46	1.83E-44
ADCYAP1R1	-2.141277188	0.041315849	2.55E-46	1.84E-44
EDN1	-2.022590854	5.130560572	4.07E-46	2.93E-44
OVCH2	-3.003606805	-0.982949681	4.15E-46	2.99E-44
AC000050.2	-2.2466353	-2.945153711	4.79E-46	3.45E-44
RETN	-2.952628451	1.866419174	4.97E-46	3.57E-44
CTIF	-1.210638285	5.074962729	5.15E-46	3.69E-44
SHROOM4	-1.752511788	4.989841488	5.24E-46	3.76E-44
GREM1	5.032348845	5.968185719	5.51E-46	3.94E-44
KCNIP1	-2.131281324	-0.848871767	5.56E-46	3.97E-44
PTPN1	-1.025570349	6.604957381	5.65E-46	4.04E-44
GPR4	-1.573666051	3.06927603	6.18E-46	4.40E-44
CENPI	2.719659481	2.439373761	6.18E-46	4.40E-44
CHEK1	2.595576549	3.987179018	6.94E-46	4.94E-44
FGF2	-2.042062128	2.395665765	7.63E-46	5.42E-44
PKMYT1	2.965141922	3.336334529	7.75E-46	5.50E-44
ZEB1	-1.378074726	4.827546219	7.98E-46	5.66E-44
OTX1	3.315111395	2.614337088	8.95E-46	6.34E-44
FZD4	-1.61030062	5.258995808	9.35E-46	6.62E-44
RGS17	3.710291728	3.563528063	1.20E-45	8.50E-44
FER1L4	4.135140275	4.257238572	1.26E-45	8.93E-44
KIF15	2.671070799	3.048589029	1.34E-45	9.42E-44
MSTO1	1.514702404	3.734342912	1.41E-45	9.95E-44
CACNA1S	-3.350387985	-1.664649013	1.52E-45	1.07E-43
LINC01270	2.818795071	1.824866755	1.69E-45	1.19E-43
DARS-AS1	1.897868956	1.071537388	2.02E-45	1.42E-43
MAGI2-AS3	-1.57730773	4.066643671	2.11E-45	1.48E-43
AC103591.4	-1.449176682	-0.421516511	2.25E-45	1.58E-43
NEXN	-1.551377041	3.866126514	2.26E-45	1.58E-43
POLE2	2.319764035	2.671314533	2.45E-45	1.71E-43
CAV3	-3.060836982	-2.23646379	2.47E-45	1.72E-43
HROB	2.728693716	2.739183659	2.55E-45	1.78E-43
NEBL	-1.642488483	6.321025569	2.86E-45	1.99E-43
KDELR3	2.228313157	5.722321443	3.00E-45	2.08E-43
EXD1	-2.418452961	-2.196976991	3.02E-45	2.09E-43
RAB26	3.596811841	1.927547345	3.12E-45	2.16E-43
ERICH4	-2.282249378	-3.014939998	3.53E-45	2.44E-43
PCDH15	-3.107020949	0.177383082	3.74E-45	2.58E-43
ESPL1	3.114405365	3.916254723	3.91E-45	2.69E-43
FBP1	-1.69321938	6.081000012	3.96E-45	2.73E-43
TICRR	2.858527907	2.391097021	4.16E-45	2.86E-43
SCAI	-1.172392964	3.968312219	4.20E-45	2.88E-43
FAM111B	2.723987061	3.598825232	4.73E-45	3.24E-43
NECTIN4	2.338078911	6.068251948	5.27E-45	3.61E-43
KL	-2.349053264	2.529737492	6.47E-45	4.43E-43
TLR4	-1.623894773	4.872098917	6.96E-45	4.76E-43
SPC24	2.681195529	3.10888655	7.12E-45	4.86E-43
PREX2	-1.903504783	3.49371199	7.16E-45	4.88E-43
UNC5CL	3.064397165	3.939937993	7.17E-45	4.89E-43
NEIL3	4.245280277	2.306333057	7.29E-45	4.96E-43
AL390719.1	2.764779811	2.467180215	7.71E-45	5.24E-43
CHAF1B	1.935168451	3.659231662	7.91E-45	5.37E-43
MDK	3.066391277	8.289671182	8.66E-45	5.88E-43
MCM4	2.206834016	6.497116954	8.75E-45	5.93E-43
PVT1	2.80799607	4.229127649	8.89E-45	6.02E-43
ONECUT1	6.550877623	0.911607865	9.67E-45	6.54E-43
GINS2	2.83715565	3.596699307	1.02E-44	6.90E-43
VAMP2	-1.179667215	5.856200146	1.05E-44	7.10E-43
PRDM11	-1.203649869	3.558659142	1.08E-44	7.25E-43
AC144831.1	-1.782403313	0.925236994	1.21E-44	8.16E-43
KAT2A	1.686647445	5.974039415	1.31E-44	8.78E-43
RUNDC3A-AS1	3.689708756	0.5668099	1.46E-44	9.77E-43
PCLAF	2.638522685	2.665545492	1.56E-44	1.05E-42
NME1	2.175181893	4.432122578	1.71E-44	1.15E-42
CCNA2	2.936698194	4.182630285	1.76E-44	1.18E-42
ARSH	5.278716186	-0.559506947	1.77E-44	1.18E-42
ROR1	-1.818480838	3.671595509	1.78E-44	1.19E-42
Z98257.1	6.028658407	3.445742088	2.02E-44	1.34E-42
AL031985.3	1.804014063	1.721123733	2.20E-44	1.46E-42
CDCA5	2.964896602	4.522618858	2.27E-44	1.51E-42
GJA5	-1.680340178	4.659651301	2.40E-44	1.59E-42
AL357146.1	-2.714370667	-3.413168078	2.49E-44	1.65E-42
IL33	-2.123731845	5.25280891	2.60E-44	1.73E-42
SALL4	3.389923451	2.146642974	2.65E-44	1.75E-42
FPR1	-1.954107701	4.274290401	3.26E-44	2.15E-42
AC020907.1	5.508604707	0.500339488	3.45E-44	2.27E-42
AFF3	-2.38281126	3.542486743	3.74E-44	2.47E-42
TNS2	-1.422944694	6.491026063	3.76E-44	2.48E-42
LILRA1	-1.660372311	0.745619995	4.26E-44	2.80E-42
H2BC5	2.618688253	4.407995827	4.33E-44	2.84E-42
PTGER4	-1.601913643	4.185696382	4.78E-44	3.14E-42
HOXA5	-1.634137634	2.750683707	5.41E-44	3.55E-42
FANCA	1.934740737	3.824032348	5.52E-44	3.61E-42
LINC01703	2.464341937	-0.040786403	6.03E-44	3.94E-42
CCDC69	-1.515175669	5.865626047	6.38E-44	4.16E-42
HS6ST2	3.704275004	5.496831067	8.63E-44	5.62E-42
F2RL3	-1.892266708	2.974471136	8.63E-44	5.62E-42
PAFAH1B3	2.25473562	4.717894897	8.71E-44	5.66E-42
GPRIN1	2.699382424	3.27328997	9.01E-44	5.85E-42
MIR3677	-2.425698711	-2.425123988	9.07E-44	5.89E-42
PDIA4	1.762420942	8.918368963	9.26E-44	6.00E-42
CLSPN	2.726311042	3.445790777	1.23E-43	7.95E-42
MGC27382	-3.030401437	-0.32009995	1.34E-43	8.65E-42
PCAT6	2.698584303	2.210445596	1.47E-43	9.48E-42
AC080037.2	5.228596206	0.779063192	1.48E-43	9.56E-42
ADAMTS9-AS1	-2.434240478	0.541577648	1.53E-43	9.83E-42
NLN	1.391639906	5.31767691	1.61E-43	1.03E-41
TTC28	-1.275487072	4.799355597	1.78E-43	1.15E-41
PHKA1	1.64394245	4.675253052	1.86E-43	1.20E-41
MNX1	4.257879098	1.380194447	2.01E-43	1.29E-41
MYO7A	1.962645944	4.12785036	2.06E-43	1.32E-41
SOCS2	-1.982752114	4.924936456	2.20E-43	1.41E-41
ACKR1	-2.384263263	4.253691263	2.35E-43	1.50E-41
MYBL2	3.807100635	5.704122159	2.39E-43	1.52E-41
DNAH14	1.995108324	3.503749086	2.45E-43	1.56E-41
PROS1	-1.529795273	5.811100791	2.45E-43	1.56E-41
ESCO2	2.612134484	2.422346235	2.50E-43	1.60E-41
ICAM2	-1.408141994	3.103435774	2.77E-43	1.76E-41
TSACC	3.034793392	-0.192682189	2.80E-43	1.78E-41
CYP1A2	-3.836926896	-0.843589075	2.89E-43	1.83E-41
ANXA3	-1.870192391	6.26877579	3.05E-43	1.93E-41
EMC3-AS1	1.96761009	0.816083706	3.09E-43	1.96E-41
SLC2A1	3.508508658	7.491579648	3.13E-43	1.98E-41
ORC1	2.736937522	2.892738341	3.28E-43	2.08E-41
TONSL	2.116333734	4.465772643	3.48E-43	2.20E-41
PPP1R14BP3	2.035339668	3.868654345	3.63E-43	2.29E-41
LINC02817	-2.588286955	-3.275503961	4.75E-43	3.00E-41
RFLNB	-1.363697912	4.44890631	5.60E-43	3.53E-41
REM1	-1.640042015	0.280859828	5.78E-43	3.63E-41
CCNF	1.87255322	3.998057059	5.91E-43	3.71E-41
ATP1A2	-2.309004241	1.731077593	7.26E-43	4.55E-41
HMGB3P10	-2.301498401	-3.271690799	7.93E-43	4.97E-41
ADTRP	-2.12182714	2.374991781	8.15E-43	5.10E-41
FEZF1-AS1	6.111138816	2.897907634	8.98E-43	5.62E-41
SOX18	-1.651479326	3.067947778	9.41E-43	5.88E-41
MTARC2	-1.483707858	4.378161519	9.65E-43	6.03E-41
LINC00092	-1.860840838	0.028857237	9.78E-43	6.10E-41
ADAMTSL4	-1.832764003	4.78777793	1.03E-42	6.41E-41
HEMGN	-2.446172308	-3.081141748	1.11E-42	6.89E-41
GJB2	4.589409302	5.252957914	1.19E-42	7.42E-41
TMEM182	1.527989023	3.128818766	1.29E-42	7.99E-41
LINC02785	-2.052050585	-0.981185209	1.53E-42	9.50E-41
LCAL1	7.768252981	4.830905221	1.69E-42	1.05E-40
GMFG	-1.495469918	4.800170046	1.77E-42	1.09E-40
LRP2BP	-1.729495351	2.546190307	1.90E-42	1.17E-40
WFDC1	-1.882474511	2.827693506	1.93E-42	1.19E-40
CENPU	2.348722755	4.009461207	1.97E-42	1.22E-40
LINC02416	4.261673318	-1.149848274	2.12E-42	1.31E-40
LIM2	-2.915895062	-4.101663089	2.16E-42	1.33E-40
AL049634.1	-2.218038569	-2.767457692	2.20E-42	1.35E-40
NTM	-2.085590202	4.499729721	2.48E-42	1.52E-40
PCYOX1	-1.120331686	7.246429714	2.53E-42	1.55E-40
ZNF22-AS1	-1.220040796	1.552992088	3.18E-42	1.95E-40
ASF1B	2.365116938	4.251252879	3.34E-42	2.05E-40
AC147067.2	-2.012434971	-2.151908021	3.61E-42	2.21E-40
GALNT18	-1.429423325	5.134823165	3.65E-42	2.23E-40
LMO7	-1.402627645	8.128001474	3.71E-42	2.26E-40
LINC01852	-1.260216941	0.608171896	3.92E-42	2.39E-40
FOXD3-AS1	6.927858988	0.267721851	4.08E-42	2.49E-40
HMOX1	-1.750931512	6.393321974	4.56E-42	2.77E-40
SGCA	-2.016510959	2.508531872	5.02E-42	3.05E-40
SLC35F2	1.866054798	5.430020861	5.31E-42	3.23E-40
HSPB3	-2.524126203	-1.593755275	5.85E-42	3.55E-40
FAM167B	-1.445599829	2.386994015	6.75E-42	4.09E-40
CRIM1	-1.362295327	6.610365066	7.21E-42	4.36E-40
KISS1R	6.119484151	0.896251395	7.41E-42	4.48E-40
C1orf74	1.254772592	2.321706538	7.67E-42	4.63E-40
KNOP1	1.109248672	3.916736108	7.99E-42	4.82E-40
CENPE	2.628105619	3.654427126	8.06E-42	4.86E-40
AGMAT	2.581516909	1.916550107	8.35E-42	5.03E-40
PBK	3.366137801	3.274772619	8.56E-42	5.15E-40
LINC00857	2.267367042	2.154322327	9.13E-42	5.49E-40
NIM1K	-2.26255861	1.174406701	9.46E-42	5.68E-40
C11orf80	1.408845829	4.347657333	9.52E-42	5.71E-40
SKA1	3.018018458	2.567969469	9.73E-42	5.83E-40
AC004947.2	-2.301323751	-1.272419066	9.85E-42	5.89E-40
DONSON	1.435491615	3.722256059	1.01E-41	6.03E-40
KLF2	-1.770537639	5.057657867	1.02E-41	6.10E-40
MME	-2.438081309	4.716395552	1.06E-41	6.33E-40
ECT2	2.157252634	5.728306576	1.07E-41	6.39E-40
TNFRSF21	1.964740234	7.665317167	1.20E-41	7.15E-40
MMP11	5.272809126	7.185129232	1.49E-41	8.88E-40
ATP10B	5.507180539	4.047470954	1.52E-41	9.03E-40
CYP27A1	-1.740307002	6.436055698	1.65E-41	9.82E-40
AL357054.4	-1.757145787	0.605070805	1.68E-41	9.93E-40
FRMD4B	-1.135046767	5.237187804	1.72E-41	1.02E-39
GRHL3	3.516303176	1.871972106	1.73E-41	1.02E-39
BLM	2.126735748	2.859966115	1.92E-41	1.13E-39
BUB1	2.626824945	4.617523274	1.93E-41	1.14E-39
ARRB1	-1.361527146	6.22845633	2.04E-41	1.20E-39
CAMP	-2.655039808	-0.128976292	2.12E-41	1.25E-39
KAT2B	-1.153016426	4.736021951	2.28E-41	1.34E-39
ID4	-1.984767808	4.953704896	2.34E-41	1.38E-39
KLF10	-1.138159755	6.433978606	2.51E-41	1.48E-39
WWC2-AS2	-1.617241938	-0.735720647	2.53E-41	1.49E-39
ABCA9	-1.746822369	1.932837058	2.68E-41	1.57E-39
TRAIP	1.798583827	2.391305839	2.74E-41	1.61E-39
CYRIA	-1.413437599	4.383784005	2.82E-41	1.65E-39
AL591686.1	-2.999408005	-3.206090734	2.90E-41	1.69E-39
LINC02757	-2.112517905	-2.904890303	3.07E-41	1.79E-39
CDT1	2.747649475	4.065440276	3.12E-41	1.82E-39
UBASH3B	-1.650720376	4.178959504	3.13E-41	1.83E-39
CCNE1	3.277541917	3.213318171	3.32E-41	1.94E-39
LMOD3	-1.298115268	-0.408892501	4.09E-41	2.38E-39
FAM136A	1.161578387	5.484876584	4.38E-41	2.55E-39
SLC25A10	2.266999571	3.046050325	4.56E-41	2.65E-39
ACACB	-1.358087354	4.077417206	5.03E-41	2.92E-39
KIF23	2.570502507	4.185731843	5.29E-41	3.07E-39
FBLN5	-1.801079917	6.025666365	5.77E-41	3.34E-39
AC104938.1	-1.572622854	-2.288815916	6.08E-41	3.52E-39
SPP1	4.785616975	9.139659041	6.11E-41	3.53E-39
KIFC1	2.7380405	4.663905677	6.34E-41	3.66E-39
AC116407.1	-2.00214957	1.423562196	6.34E-41	3.66E-39
FANCD2	1.522950501	3.733803277	6.73E-41	3.88E-39
ANKRD29	-2.188355294	4.623187202	7.15E-41	4.12E-39
VWC2	-2.5441511	-1.855231588	8.03E-41	4.62E-39
CCDC50	-1.040038762	5.91948311	8.36E-41	4.80E-39
TRAPPC3L	-2.086402653	-2.997852688	9.10E-41	5.22E-39
DAO	-2.416589959	-3.032300147	1.01E-40	5.81E-39
IL1RL1	-2.876871753	3.745888677	1.04E-40	5.94E-39
CCL24	-2.4855429	1.966644297	1.07E-40	6.12E-39
PLEK2	2.726639005	4.297375364	1.18E-40	6.74E-39
TFR2	3.079045016	1.91931254	1.26E-40	7.18E-39
PDGFB	-1.493354527	4.862112888	1.41E-40	8.02E-39
SLC12A4	-1.050611541	5.796657864	1.41E-40	8.03E-39
FCGR3B	-2.363391427	1.966894851	1.48E-40	8.43E-39
AC100861.1	1.612877438	1.318628866	1.74E-40	9.88E-39
PIMREG	3.191807822	2.730503817	1.75E-40	9.92E-39
LINC02452	-2.037905129	-3.270693203	1.77E-40	1.00E-38
AC112777.1	3.258262414	-0.58197439	1.87E-40	1.06E-38
CCDC150	2.566814294	1.311137511	1.99E-40	1.13E-38
CLDN18	-3.54199745	7.723865467	2.05E-40	1.16E-38
LINC02570	-3.434740808	-2.94160911	2.11E-40	1.19E-38
MOCS1	-1.383650396	3.948867436	2.18E-40	1.23E-38
LIFR	-1.650395398	6.451962571	2.18E-40	1.23E-38
LINC01165	-2.434585502	-3.269791012	2.26E-40	1.27E-38
ITIH5	-2.102064872	4.697376131	2.31E-40	1.30E-38
AC009962.1	-1.508964055	-0.866206609	2.34E-40	1.31E-38
PITX2	8.095012351	2.922160398	2.44E-40	1.37E-38
CD300LF	-1.778690773	3.602102445	2.62E-40	1.47E-38
AC145343.1	2.997644319	0.41348405	2.63E-40	1.47E-38
AURKA	2.628490389	4.57946174	2.71E-40	1.52E-38
SOX4	1.664326797	7.902479487	2.72E-40	1.52E-38
TK1	2.643476377	5.932894988	2.77E-40	1.55E-38
ODAM	-3.147675693	-0.453573365	2.83E-40	1.58E-38
SLC7A7	-1.454615301	5.501738683	2.85E-40	1.59E-38
ARL6	-1.048615234	3.125602286	2.99E-40	1.67E-38
PRSS35	-2.240678983	0.046885802	3.21E-40	1.79E-38
ITPRID2	-1.163639251	7.126123042	3.25E-40	1.81E-38
LASTR	3.915158619	0.779552249	3.35E-40	1.86E-38
ARHGAP18	-1.161760579	5.975039635	3.50E-40	1.95E-38
PDE8B	-1.411816127	1.269504382	3.58E-40	1.99E-38
LINC01070	-3.395384326	-3.89911627	3.65E-40	2.02E-38
AC011239.2	-2.367758817	-2.45294891	3.76E-40	2.08E-38
C5orf34	2.018501662	1.67688855	4.42E-40	2.45E-38
CRTAC1	-2.621761012	5.407067744	4.46E-40	2.47E-38
C1QTNF6	2.286669052	4.802927606	4.61E-40	2.55E-38
TMEM150B	-1.829166943	2.13493382	4.63E-40	2.56E-38
EXOC3L1	-1.276844062	2.59527503	5.16E-40	2.85E-38
ZFP36	-1.829300866	8.373754356	5.56E-40	3.07E-38
TMOD1	-1.770569582	2.084353435	5.75E-40	3.17E-38
MTATP8P1	-2.975641028	-1.161400367	5.85E-40	3.22E-38
AC090559.1	-1.554373113	2.658754286	6.02E-40	3.31E-38
FANCI	1.885325394	4.679083541	6.06E-40	3.33E-38
CHRDL1	-2.31379511	4.859126331	6.45E-40	3.53E-38
AL118508.3	-1.971738367	-2.45490359	6.52E-40	3.57E-38
RALGPS2	1.628994894	5.10510193	7.13E-40	3.90E-38
GALNT7	1.724195599	6.133021413	7.88E-40	4.31E-38
PTPRM	-1.415550061	5.999452248	8.10E-40	4.43E-38
LINC02882	6.719488893	0.642005875	8.75E-40	4.78E-38
STOM	-1.234679784	8.342759474	9.59E-40	5.23E-38
AC026992.1	-2.493429798	-2.356711114	1.04E-39	5.65E-38
GDF2	-3.818150484	-4.012734564	1.05E-39	5.73E-38
TFAP2A	3.744023343	3.693404738	1.16E-39	6.33E-38
SLC24A2	5.052461222	0.372659855	1.25E-39	6.77E-38
DDX12P	2.383359467	1.688898906	1.26E-39	6.83E-38
SYNJ2	1.518568198	4.933628531	1.27E-39	6.86E-38
AC134312.1	-2.557337408	-2.862665896	1.31E-39	7.09E-38
E2F3	1.342330619	4.910607985	1.34E-39	7.25E-38
MED28P8	-3.24992112	-4.230548867	1.36E-39	7.36E-38
COL11A1	6.233885079	6.194528202	1.38E-39	7.44E-38
SHCBP1	2.284376681	3.548960199	1.47E-39	7.94E-38
EPCAM	1.606359784	8.878053051	1.52E-39	8.20E-38
ARHGEF16	1.761084742	5.303428304	1.66E-39	8.95E-38
PAPSS2	-1.484009742	6.686028153	1.72E-39	9.24E-38
SLC44A2	-1.005101507	7.83064754	1.77E-39	9.50E-38
LINC02104	-2.133164598	-2.63023664	1.85E-39	9.94E-38
RBP2	-2.886310178	-0.254152772	2.14E-39	1.15E-37
ABCG1	-1.415975123	5.674310229	2.27E-39	1.22E-37
SMAD7	-1.109961137	5.266725085	2.43E-39	1.30E-37
APBB1	-1.381390267	4.679699764	2.53E-39	1.35E-37
GGCT	1.684592132	4.80510951	3.05E-39	1.63E-37
ERO1A	2.061886098	7.738223901	3.16E-39	1.69E-37
RAD54B	1.894925145	0.865047259	3.24E-39	1.73E-37
AC244153.1	-2.493169001	0.23268879	3.25E-39	1.74E-37
ARMH2	-3.081919219	-3.522224302	3.29E-39	1.75E-37
RHBG	4.548770645	0.132522959	3.76E-39	2.00E-37
ART4	-2.275224908	1.012332203	4.24E-39	2.26E-37
MAST1	3.238854752	1.173748948	4.95E-39	2.63E-37
C11orf96	-1.846203142	4.68135925	5.03E-39	2.67E-37
PPP1R14D	5.986496558	3.782525247	5.17E-39	2.74E-37
NARF	1.254396129	6.197765648	5.39E-39	2.86E-37
ZBTB4	-1.023932874	6.954671388	5.43E-39	2.88E-37
BCL2L15	3.449301202	4.09904409	5.53E-39	2.93E-37
UBL3	-1.103834069	6.435130283	6.16E-39	3.26E-37
HHIP	-2.929831334	4.661906134	6.63E-39	3.50E-37
XDH	4.057617385	4.546206463	6.77E-39	3.57E-37
LBX2	2.090882641	0.506202779	6.92E-39	3.65E-37
RAB11FIP1	-1.462731122	7.081608497	7.37E-39	3.88E-37
XYLB	1.599922887	2.745065752	7.49E-39	3.94E-37
ARHGAP44	-1.65934365	4.534169561	7.74E-39	4.07E-37
PHOSPHO1	-1.713493812	0.05617413	8.55E-39	4.49E-37
SEMA6D	-2.078809686	3.050759723	9.84E-39	5.16E-37
STYK1	2.587010018	3.319811424	1.02E-38	5.36E-37
PTGIR	-1.363882882	2.600334451	1.04E-38	5.46E-37
MAD2L1	2.568615034	4.332353699	1.11E-38	5.82E-37
SELPLG	-1.463035637	5.576022985	1.14E-38	5.96E-37
RBMS3	-1.586922989	4.387972281	1.16E-38	6.03E-37
ADGRL4	-1.292480168	4.361433831	1.25E-38	6.51E-37
CASP4LP	-1.484768339	2.255447716	1.29E-38	6.71E-37
LINC01081	-1.945643543	-2.327251377	1.32E-38	6.84E-37
SRL	-1.835603308	0.031837779	1.37E-38	7.08E-37
GCNT3	5.158681011	5.720868774	1.37E-38	7.08E-37
AC068228.1	4.949027698	-1.956390571	1.37E-38	7.10E-37
POLG2	1.253166551	3.752642794	1.40E-38	7.27E-37
NR4A3	-2.274648277	4.388503812	1.46E-38	7.55E-37
MRAS	-1.134687303	4.663546524	1.51E-38	7.80E-37
MARCKSL1	1.90429333	7.678992211	1.69E-38	8.70E-37
CENPK	2.213577824	2.81667811	1.70E-38	8.77E-37
INKA1	-1.492807202	1.070682724	1.90E-38	9.77E-37
PLCE1	-1.410286977	4.39611365	1.92E-38	9.91E-37
SPI1	-1.592228158	5.693804701	1.96E-38	1.01E-36
CRY2	-1.174813494	5.800962467	1.99E-38	1.02E-36
ZEB2	-1.379119129	5.846603292	1.99E-38	1.02E-36
HNF4G	3.484411688	3.157464004	2.11E-38	1.08E-36
ENTPD8	4.646206804	2.335269494	2.16E-38	1.11E-36
AC090796.1	-2.838762653	-1.864857549	2.16E-38	1.11E-36
DBNDD1	1.970694326	5.026994764	2.18E-38	1.11E-36
ST13P20	-2.648909646	-3.556466181	2.32E-38	1.19E-36
PROM2	2.614619294	6.469227947	2.45E-38	1.25E-36
RIPOR1	-1.215871425	5.535302241	2.49E-38	1.27E-36
N4BP2L1	-1.226841802	3.965133006	2.55E-38	1.30E-36
AC007182.1	-2.840027081	-2.908781001	2.64E-38	1.35E-36
LINC02035	-1.063391593	3.325316719	3.14E-38	1.60E-36
ZFP69B	1.655211619	1.329646797	3.24E-38	1.65E-36
SERPING1	-1.403594783	8.542821283	3.61E-38	1.83E-36
RHBDL1	3.175340518	2.419119128	3.98E-38	2.02E-36
SLC44A3-AS1	1.491110453	2.740098493	4.06E-38	2.06E-36
KCTD12	-1.347562388	7.229997059	4.23E-38	2.14E-36
CDCA7	2.894135473	4.715801607	4.27E-38	2.16E-36
CHRM2	-3.403392545	-1.075178387	4.30E-38	2.17E-36
CYP24A1	6.719087055	6.604950801	4.81E-38	2.43E-36
AC024132.3	-3.514637554	-4.241390513	4.82E-38	2.43E-36
PCARE	-2.981597251	-0.899971708	4.84E-38	2.44E-36
SYT12	5.451411928	4.931985066	4.96E-38	2.50E-36
ADAMTS14	2.653400347	2.907493428	5.50E-38	2.76E-36
AC092384.1	-1.896611233	-2.993637317	5.52E-38	2.77E-36
APOBR	-1.618258404	4.411969217	5.60E-38	2.81E-36
PGM5	-1.894502884	3.76497546	5.63E-38	2.82E-36
AL132799.1	-3.126141072	-4.330605495	6.06E-38	3.04E-36
SH3BP5	-1.404024106	3.39409975	6.13E-38	3.07E-36
AP002856.2	-4.093619659	-1.223565683	6.54E-38	3.27E-36
IL17D	-1.585757726	0.830354016	6.88E-38	3.44E-36
ABCA3	-2.114355361	8.46749197	7.24E-38	3.62E-36
XPR1	1.885989575	7.401148834	7.57E-38	3.78E-36
TBX5	-1.510945331	3.410781004	7.74E-38	3.86E-36
SLCO2A1	-1.795906665	6.456737637	7.85E-38	3.91E-36
CDKN3	2.859623254	3.220079554	8.59E-38	4.27E-36
ABCC3	2.524239151	7.958411536	8.83E-38	4.39E-36
DMBX1	6.233878221	1.243402383	8.97E-38	4.46E-36
FIGNL1	1.555438993	4.158381685	9.12E-38	4.53E-36
ITPKA	5.174848261	3.85107458	1.04E-37	5.18E-36
P3H4	2.064642696	5.380780454	1.07E-37	5.31E-36
PCDHGC3	-1.54812134	4.107698341	1.09E-37	5.38E-36
ZBTB47	-1.100227812	3.920244755	1.11E-37	5.48E-36
TERT	5.465083987	0.100777925	1.17E-37	5.78E-36
ACOXL	-1.609035843	3.302618219	1.22E-37	6.02E-36
AC010207.1	-1.861530687	-1.649047183	1.22E-37	6.04E-36
LINC01645	-2.52294227	-2.24704136	1.24E-37	6.12E-36
EIF4E3	-1.122908923	4.888699678	1.25E-37	6.18E-36
E2F2	2.32811774	2.832511013	1.30E-37	6.38E-36
PDK1	1.665097085	5.012499437	1.35E-37	6.64E-36
MED4-AS1	-2.284236865	-3.256731224	1.40E-37	6.88E-36
PCOLCE2	-2.338303717	3.459384579	1.64E-37	8.06E-36
FLAD1	1.391238816	5.783252806	1.96E-37	9.59E-36
AC011294.1	4.820690802	0.569359762	2.02E-37	9.88E-36
LEPR	-1.859781564	4.823938804	2.03E-37	9.93E-36
RPGR	-1.075334599	3.493234701	2.04E-37	1.00E-35
SYT7	3.431197178	6.149183798	2.05E-37	1.00E-35
INTS8	1.140385639	5.365221883	2.43E-37	1.18E-35
DCSTAMP	-2.182833902	1.469065369	2.72E-37	1.33E-35
LINC01572	2.963566708	0.157045435	2.75E-37	1.34E-35
PDLIM1	-1.083946771	7.376098806	2.78E-37	1.35E-35
BMP8A	2.754157169	3.511800084	2.87E-37	1.40E-35
PTTG1	2.323382926	4.597824784	3.07E-37	1.49E-35
CDC37P2	3.789307737	-1.622609844	3.31E-37	1.60E-35
CDK1	2.435946374	5.118908739	3.40E-37	1.65E-35
PLEKHA8	1.261826159	4.341777021	3.61E-37	1.75E-35
MIR4653	3.192201001	-1.629180508	3.80E-37	1.84E-35
STAC	-2.077537171	3.381051765	3.92E-37	1.89E-35
PRKCQ	-1.60631097	2.629766944	3.95E-37	1.91E-35
P2RY6	2.984079458	4.224365526	4.47E-37	2.16E-35
PGM2L1	1.861497881	5.469767688	4.50E-37	2.17E-35
GJA4	-1.455313886	3.430762729	4.65E-37	2.24E-35
GATA1	-1.776379103	-1.742245861	4.91E-37	2.36E-35
PMM2	1.173205254	3.775708704	5.06E-37	2.43E-35
PLK4	2.026641218	3.174769396	5.12E-37	2.46E-35
HPSE2	-2.422903036	0.636984134	5.29E-37	2.54E-35
MRPL20-DT	1.653903106	1.295580155	5.40E-37	2.59E-35
EGR1	-1.868257663	8.215951097	5.55E-37	2.66E-35
TIMELESS	1.708036206	5.548746456	6.00E-37	2.87E-35
NPR3	-1.783712164	4.762185378	6.18E-37	2.96E-35
LINC00211	-2.247617468	-3.082571932	6.33E-37	3.03E-35
SAMD10	1.727420577	3.67980001	6.51E-37	3.11E-35
AC107959.4	3.528100632	-0.836714621	6.56E-37	3.13E-35
AC103718.1	5.686219005	1.492519954	7.55E-37	3.60E-35
ABCB1	-1.693994499	2.335688538	7.62E-37	3.63E-35
H2BC20P	2.078563417	2.738456342	8.36E-37	3.97E-35
PDE1B	-1.584890284	2.31678329	8.97E-37	4.26E-35
MYEOV	6.30238776	4.402457778	9.16E-37	4.35E-35
TRAP1	1.15751721	5.510020765	9.83E-37	4.66E-35
AC133785.1	6.72902302	-0.380223533	1.17E-36	5.56E-35
RAD51	2.195141095	2.80263315	1.17E-36	5.56E-35
TNS3	-1.108189696	7.540708468	1.18E-36	5.60E-35
SHC3	-1.852972399	3.612143786	1.25E-36	5.92E-35
GATA6	-1.751130052	3.849700538	1.32E-36	6.25E-35
SLC5A4	-1.885023105	-1.03268912	1.34E-36	6.32E-35
LYPD1	3.50656941	1.331820301	1.35E-36	6.36E-35
PODXL2	3.237666656	5.677984004	1.36E-36	6.39E-35
INAVA	2.200052225	5.465719176	1.48E-36	6.97E-35
LMNB1	1.867425	5.54035124	1.48E-36	6.97E-35
PILRA	-1.517411325	3.827550804	1.55E-36	7.29E-35
ZC3HAV1L	1.553206663	2.433979233	1.69E-36	7.96E-35
GINS4	2.405451826	2.510637708	1.75E-36	8.19E-35
ATIC	1.215744996	6.649627913	1.84E-36	8.64E-35
CA3	-2.153214848	1.681036331	1.86E-36	8.73E-35
OR6K4P	-3.273738561	-4.266724398	1.87E-36	8.73E-35
SLC50A1	1.749383356	6.798646836	1.90E-36	8.86E-35
PLEKHO2	-1.171675755	5.789571488	1.90E-36	8.86E-35
UTP25	1.012684665	5.118635014	2.01E-36	9.41E-35
SAMHD1	-1.200377039	7.142179801	2.10E-36	9.78E-35
LINC02884	-1.851975453	0.182599418	2.15E-36	1.00E-34
SLC27A3	-1.331157401	5.384947566	2.47E-36	1.15E-34
KCNN4	3.240560365	5.770650953	2.61E-36	1.21E-34
FILIP1	-1.828903607	3.053783722	2.85E-36	1.32E-34
NTRK3	-1.947434982	1.184940333	3.05E-36	1.42E-34
AC112722.1	-2.084125611	-1.585834821	3.34E-36	1.55E-34
PPARGC1B	-1.439429613	2.774607336	3.38E-36	1.57E-34
AC025470.2	-2.539780337	-3.025716349	3.78E-36	1.75E-34
B4GALNT4	4.74915645	3.530257121	4.06E-36	1.88E-34
SFXN4	1.369411434	4.719636479	4.31E-36	1.99E-34
DUS4L-BCAP29	-1.019183369	2.673633513	4.40E-36	2.03E-34
MT1JP	-2.901913875	-2.549413914	4.61E-36	2.13E-34
TDRKH-AS1	2.138007086	-0.203829608	4.76E-36	2.20E-34
DCST1	2.684486989	-0.119444875	5.13E-36	2.37E-34
SPC25	2.349436069	2.299707808	5.19E-36	2.39E-34
AQP11	1.500770789	0.960037084	5.54E-36	2.55E-34
ATP2B1-AS1	-1.267680672	0.629755243	5.70E-36	2.62E-34
LINC01028	-3.873178523	-3.963332698	5.77E-36	2.65E-34
GPC3	-2.181165402	5.497913549	5.89E-36	2.71E-34
CBX8	1.33228991	3.68321303	6.01E-36	2.76E-34
CABYR	4.565202129	3.156662117	6.03E-36	2.76E-34
AC009262.1	6.755954335	-0.662359829	6.17E-36	2.83E-34
AC027601.2	-1.745332062	-2.285331425	6.19E-36	2.83E-34
CCN2	-1.612350464	7.912474847	6.22E-36	2.84E-34
DUBR	-1.28029293	2.365055222	6.56E-36	3.00E-34
OGFRP1	1.354913255	2.096499844	6.77E-36	3.09E-34
CCIN	-1.967960689	-1.523758376	6.82E-36	3.12E-34
WNT3	2.059649235	3.442060233	7.64E-36	3.48E-34
RRAS	-1.346247564	5.870692317	7.77E-36	3.54E-34
SNCA	-1.629358914	1.165199093	7.85E-36	3.58E-34
MINAR1	1.982621326	0.835401381	8.32E-36	3.79E-34
AL391056.1	4.520485687	1.980871112	8.55E-36	3.89E-34
TFAP2A-AS2	2.54804419	-0.690305745	8.60E-36	3.91E-34
WASIR2	3.380593481	-0.744243844	8.73E-36	3.96E-34
AC004540.2	-1.755647068	-0.335376796	9.41E-36	4.27E-34
CCRL2	-1.547907342	3.309126344	9.75E-36	4.42E-34
AL133335.2	5.443913201	-1.566836704	9.92E-36	4.49E-34
CDH13	-1.823475082	2.871427724	9.98E-36	4.52E-34
FAM124A	-1.371266526	1.612639132	1.01E-35	4.55E-34
TFAP4	1.227033908	3.951272818	1.05E-35	4.72E-34
DCAF13	1.320457207	5.835820724	1.15E-35	5.21E-34
KPNA2	1.948631675	6.77769728	1.25E-35	5.63E-34
NCAPG2	1.775209397	4.963679386	1.27E-35	5.71E-34
AL354861.3	-2.630375892	-2.165126469	1.33E-35	5.97E-34
TPPP3	-2.226889458	6.011311818	1.33E-35	5.99E-34
TMPRSS11E	6.698843944	3.765186775	1.35E-35	6.09E-34
KLHL33	-1.743299584	-1.228666975	1.51E-35	6.80E-34
AC243772.3	-2.01836823	-2.803083874	1.59E-35	7.14E-34
C1orf115	-1.613222987	4.886211731	1.62E-35	7.26E-34
CDC25A	2.334973532	2.448245578	1.66E-35	7.45E-34
CCN1	-1.626715434	7.867967285	1.71E-35	7.65E-34
AL356275.1	-2.303826742	-3.47596411	1.73E-35	7.73E-34
BLACAT1	2.830558715	2.990477766	1.85E-35	8.27E-34
EFEMP1	-1.610837637	7.180536933	1.97E-35	8.79E-34
CHIAP2	-3.676069945	1.782691642	2.00E-35	8.95E-34
FLVCR2	-1.289375519	4.086807923	2.02E-35	9.01E-34
CCDC173	-2.100803023	0.965200431	2.07E-35	9.23E-34
AC107223.1	-1.822824606	-0.936903844	2.08E-35	9.30E-34
KDM5B	1.084443111	6.975573481	2.13E-35	9.48E-34
MAP3K8	-1.169598644	4.53603244	2.18E-35	9.70E-34
FAM241A	-1.13586229	3.964544099	2.23E-35	9.93E-34
MCOLN1	-1.036928812	4.633243573	2.42E-35	1.08E-33
MTBP	1.67149617	2.652801719	2.48E-35	1.10E-33
VPS9D1-AS1	2.767402858	1.741331075	2.57E-35	1.14E-33
AC105219.3	2.64054525	0.231897978	2.58E-35	1.14E-33
RANBP3L	-1.907209153	1.024631836	2.68E-35	1.19E-33
AC116317.1	-1.728467841	-1.980331691	2.76E-35	1.22E-33
AC097369.4	3.54381778	-1.128460906	2.79E-35	1.23E-33
SEPTIN10	-1.002705725	6.069027712	2.95E-35	1.30E-33
MOGAT1	-2.577022529	-2.985513024	3.11E-35	1.37E-33
ZNF239	1.655923632	2.645601273	3.31E-35	1.46E-33
PREX1	-1.247273902	5.881805422	3.37E-35	1.49E-33
KLHDC7B-DT	2.825216766	-0.450963758	3.49E-35	1.54E-33
SPATS2	1.193485965	5.116123603	3.54E-35	1.56E-33
SERINC2	2.043636526	7.680610523	3.92E-35	1.73E-33
AC068831.6	2.065415914	0.154300461	4.07E-35	1.79E-33
RCCD1	1.328542872	3.706858061	4.14E-35	1.82E-33
IL1RAPL2	6.094444664	-0.892163674	4.25E-35	1.87E-33
MSI2	1.161767343	6.362936937	4.59E-35	2.01E-33
PIK3R1	-1.070235	5.86144234	4.78E-35	2.10E-33
PRICKLE1	-1.468876982	2.387995977	5.06E-35	2.22E-33
LINC01738	-3.089590403	-3.808926313	5.16E-35	2.26E-33
CCT3	1.344295802	8.396153077	5.55E-35	2.43E-33
AC105046.1	-2.357938792	-1.9621903	5.60E-35	2.45E-33
P2RY14	-1.471522464	2.253054588	5.64E-35	2.46E-33
DNAJC22	3.44651842	3.391847981	6.37E-35	2.78E-33
SLCO5A1	3.173583186	2.118803444	6.93E-35	3.02E-33
NES	-1.590805695	5.999151105	7.91E-35	3.45E-33
LRRC8C	-1.145057845	4.520737618	8.06E-35	3.51E-33
HSD17B6	-2.276846304	5.108424205	8.09E-35	3.52E-33
SCIMP	-1.546395909	3.005868084	8.64E-35	3.76E-33
LINC02535	4.326376652	-0.627213736	8.92E-35	3.87E-33
ATAD2	1.834747426	5.630189261	9.49E-35	4.12E-33
FKBP11	1.725716106	5.243440185	9.58E-35	4.15E-33
SECISBP2L	-1.373488039	6.610037442	1.00E-34	4.35E-33
CCDC54	-2.156250297	-3.469209253	1.04E-34	4.50E-33
EFNA2	5.813006186	0.496668593	1.09E-34	4.72E-33
CTDSPL	-1.047787423	5.973643866	1.11E-34	4.78E-33
GPR182	-1.61739124	-1.01544983	1.12E-34	4.82E-33
STRA6	4.437530672	3.970893729	1.12E-34	4.82E-33
GALNT14	3.668089194	4.394089178	1.12E-34	4.82E-33
IL1RL2	2.260027716	1.781538684	1.17E-34	5.02E-33
ZNF485	1.21302194	1.751406775	1.20E-34	5.18E-33
RFC4	1.768326304	4.240326262	1.47E-34	6.34E-33
BTK	-1.406099938	4.105828749	1.49E-34	6.41E-33
AL161740.1	-3.30479553	-3.799446298	1.49E-34	6.41E-33
AC108479.1	2.396766088	-0.429726009	1.54E-34	6.63E-33
LINC01963	-1.233042842	2.4137037	1.56E-34	6.71E-33
EEF1AKMT4	2.069539428	2.392547244	1.57E-34	6.72E-33
RSPO2	-2.636539625	1.306946001	1.57E-34	6.74E-33
PALD1	-1.270484583	4.326170604	1.59E-34	6.80E-33
NEDD9	-1.585271459	7.485611797	1.60E-34	6.83E-33
CARD14	3.432139202	3.175063345	1.65E-34	7.06E-33
HLX-AS1	-2.135535448	-3.537157239	1.71E-34	7.29E-33
GPA33	-2.699314876	2.213782449	1.74E-34	7.41E-33
FGFR2	-1.799854113	5.060386274	1.77E-34	7.55E-33
HK3	-1.777647798	4.365574628	1.79E-34	7.63E-33
CSTF2	1.046345462	4.595237672	1.80E-34	7.67E-33
KIF22	1.315197325	5.09815041	1.88E-34	7.97E-33
LHFPL5	1.896730814	1.458370207	1.93E-34	8.21E-33
VWFP1	-2.182418473	-1.038998611	1.95E-34	8.28E-33
AGBL1	-2.836896404	-0.132110816	2.02E-34	8.55E-33
GPR17	-2.105846262	-0.246137496	2.06E-34	8.74E-33
CPNE7	3.186176611	3.005557023	2.14E-34	9.04E-33
CCNP	4.298210422	2.081406092	2.29E-34	9.67E-33
TRAF4	1.314359839	6.514025238	2.56E-34	1.08E-32
SLC15A3	-1.380875347	5.763730568	2.70E-34	1.14E-32
AC007743.1	-1.871133121	0.946851117	2.75E-34	1.16E-32
HTR3A	5.883182306	3.15236109	2.96E-34	1.25E-32
PARPBP	2.129850141	2.206503554	3.07E-34	1.29E-32
CCDC81	-1.997838933	0.625230747	3.15E-34	1.33E-32
LINC01426	2.533299504	2.632134756	3.27E-34	1.38E-32
LINC01616	-3.205973497	-3.464226901	3.29E-34	1.38E-32
C1orf220	2.300995348	-0.715769751	3.42E-34	1.44E-32
LINC01985	-2.452684693	-3.763059121	3.42E-34	1.44E-32
LINC02202	-1.512084545	-1.626632658	3.60E-34	1.51E-32
GPR89A	1.025230715	2.242073794	3.76E-34	1.58E-32
SOCS3	-1.517532012	7.631184602	3.81E-34	1.60E-32
TRIP13	2.629897964	4.465059289	3.87E-34	1.62E-32
TNFSF12	-1.207638172	4.383258512	4.22E-34	1.76E-32
Z69733.1	-1.511052239	-0.702877502	4.33E-34	1.81E-32
SGMS2	-1.345190585	6.343353657	4.62E-34	1.93E-32
DAB2IP	-1.083708088	6.248643962	4.68E-34	1.95E-32
SEC14L1	-1.031033299	6.643658991	4.78E-34	1.99E-32
SIX4	1.897710098	4.19446336	4.81E-34	2.00E-32
NDRG2	-1.508316028	5.614264717	4.92E-34	2.05E-32
NATD1	-1.200644877	4.232437971	5.09E-34	2.12E-32
AC009093.10	-2.270675665	-2.954773108	5.15E-34	2.14E-32
ADGRE5	-1.288626438	6.951266504	5.19E-34	2.16E-32
MANF	1.367065807	6.449836791	5.57E-34	2.31E-32
CGREF1	4.208229464	2.719956674	5.99E-34	2.48E-32
AC053503.5	-2.789769107	-3.793861854	6.25E-34	2.59E-32
PGR	-1.76722594	1.847503965	6.90E-34	2.86E-32
LINC01412	-2.085336757	-3.43122676	7.11E-34	2.94E-32
TLR8	-1.783398443	3.369390795	7.33E-34	3.03E-32
LILRB3	-1.367712286	3.619561611	7.37E-34	3.04E-32
LINC00032	-2.202945408	-2.696174914	7.48E-34	3.09E-32
SNHG4	2.135985498	2.771995947	8.22E-34	3.39E-32
NFATC1	-1.16330985	4.205705344	8.68E-34	3.57E-32
OR7E11P	-2.66913043	-2.532347056	8.75E-34	3.60E-32
PLXNB3	3.36434261	4.309508924	9.12E-34	3.74E-32
F12	2.746086187	1.81078058	9.24E-34	3.79E-32
HECW2	-1.312089771	4.825856062	9.58E-34	3.93E-32
SFTPA1	-2.831753344	12.09230372	9.98E-34	4.09E-32
AC013553.3	-1.610749545	-1.689522104	9.98E-34	4.09E-32
SOX5	-1.674785842	1.741690822	1.05E-33	4.31E-32
C2CD4A	4.097473557	4.045484199	1.07E-33	4.36E-32
ARAP2	-1.199803437	5.147199672	1.08E-33	4.42E-32
TPBG	1.760759914	5.347047157	1.10E-33	4.48E-32
FABP5	-1.782557	3.545009393	1.23E-33	5.00E-32
MEFV	-1.675807422	0.966848347	1.35E-33	5.50E-32
AC015726.1	-1.306925492	-0.132172877	1.38E-33	5.63E-32
AL137009.1	-1.884615974	-0.139754288	1.45E-33	5.91E-32
EEF1A2	6.358955394	5.997497365	1.46E-33	5.92E-32
PAK1	1.1591951	6.426069129	1.46E-33	5.93E-32
SUV39H2	1.282807295	3.224991569	1.49E-33	6.06E-32
AC073968.2	-2.892378712	-4.316441879	1.83E-33	7.44E-32
WDHD1	1.771546323	4.03758784	1.84E-33	7.44E-32
CEACAM21	-1.636040954	1.856339518	1.89E-33	7.66E-32
RASSF2	-1.246720429	5.433931312	1.96E-33	7.94E-32
SLC39A11	1.323399244	6.166760666	2.09E-33	8.45E-32
PTGES	2.980515002	5.47982334	2.09E-33	8.47E-32
PMP22	-1.189495825	6.310125123	2.13E-33	8.60E-32
AP002761.3	-1.431936524	-0.769213332	2.22E-33	8.97E-32
AP000944.5	-1.790125775	-2.288578636	2.23E-33	9.01E-32
CILP2	3.467156581	3.663308539	2.25E-33	9.09E-32
RNU6-917P	-2.313374183	-3.898649785	2.31E-33	9.30E-32
PRKG1	-1.429906833	3.593369995	2.35E-33	9.49E-32
AC100793.4	-2.221241681	-2.728113087	2.36E-33	9.49E-32
CACNA2D2	-2.386187406	6.239481094	2.50E-33	1.00E-31
AC007240.3	2.441282377	-0.264128092	2.51E-33	1.01E-31
SNHG1	1.519726026	5.058166109	2.57E-33	1.03E-31
SEC14L6	-2.098715565	3.205208564	2.61E-33	1.05E-31
CARD16	-1.319995491	3.247339235	2.62E-33	1.05E-31
ADAM12	3.086219133	4.848377876	2.63E-33	1.05E-31
CYGB	-1.253018044	3.743862998	2.76E-33	1.10E-31
SNORC	2.484127725	0.80393947	2.76E-33	1.11E-31
MMACHC	1.029786404	3.255992283	2.79E-33	1.11E-31
KLF17	-1.911468787	-2.123799084	2.91E-33	1.16E-31
AKAP7	-1.129044903	2.665758849	3.08E-33	1.23E-31
AVPR2	-1.979422044	0.04898697	3.13E-33	1.25E-31
ATAD5	1.558943843	3.047706979	3.14E-33	1.25E-31
FLT4	-1.342286348	4.599337722	3.19E-33	1.27E-31
NMU	4.558397578	2.474188024	3.37E-33	1.34E-31
BZW2	1.29186489	6.290481939	3.39E-33	1.35E-31
LINC02156	3.845315121	-0.836476901	3.51E-33	1.40E-31
PPP1R17	-2.865399182	-2.945529297	3.52E-33	1.40E-31
PCMTD1P3	4.219519362	-1.95482317	3.54E-33	1.41E-31
LY6G6E	-2.957873303	-4.189410709	3.61E-33	1.43E-31
GNG11	-1.737971336	5.618634939	3.77E-33	1.49E-31
TRPM8	7.01439091	3.36151844	3.78E-33	1.50E-31
AC104257.1	-3.391322147	-3.258317851	3.89E-33	1.54E-31
SYNDIG1L	-2.392437321	0.456705924	4.37E-33	1.73E-31
AC005180.2	-1.910345618	-2.449675089	4.75E-33	1.87E-31
AC092691.1	-2.944665897	-2.418049125	4.95E-33	1.95E-31
DEFA3	-3.496088983	-3.023338946	5.00E-33	1.97E-31
DOCK11	-1.292770571	4.954017768	5.21E-33	2.05E-31
TM6SF1	-1.379080323	1.516426139	5.35E-33	2.11E-31
TDRKH	1.379764427	4.972523518	5.43E-33	2.14E-31
AP000357.2	-2.953022456	0.563984792	5.61E-33	2.21E-31
AVL9	1.070507473	6.331167594	5.63E-33	2.21E-31
POLR2H	1.15903939	5.72789331	5.63E-33	2.21E-31
COLEC12	-1.695132866	5.811246023	5.69E-33	2.23E-31
BBOX1-AS1	5.482753489	0.930481666	5.76E-33	2.26E-31
AC243960.3	-1.58628114	-1.350859703	5.79E-33	2.27E-31
DNAJC12	4.22575911	4.647261386	5.84E-33	2.28E-31
FEN1	1.575507782	4.99633967	6.73E-33	2.63E-31
KC877392.1	-2.374248836	-3.731825228	6.75E-33	2.64E-31
KCNMB3	1.720429816	1.336098382	6.77E-33	2.64E-31
DKC1	1.114357089	6.264928484	6.83E-33	2.67E-31
AC093909.5	-3.689837388	-4.0626412	6.88E-33	2.68E-31
FEZF1	5.530535592	1.605636952	6.99E-33	2.73E-31
C2CD4D	2.534955815	0.971110195	7.27E-33	2.83E-31
AC016587.1	-3.42471022	-4.206548768	7.33E-33	2.85E-31
ANKRD22	2.768492142	4.720265036	7.48E-33	2.91E-31
ARHGAP11A	2.049289286	3.718063055	7.86E-33	3.06E-31
H2BC19P	1.890492445	1.01427728	7.89E-33	3.07E-31
AC015921.1	3.068796729	-0.980829795	7.92E-33	3.08E-31
GGTA1	-1.374833253	3.236321567	8.05E-33	3.12E-31
WDR62	2.338544551	3.704646835	8.41E-33	3.26E-31
AL133482.1	-1.679008227	1.057181776	8.48E-33	3.29E-31
STK39	1.524172864	6.017619991	8.55E-33	3.31E-31
GNL3	1.083134884	6.406132497	9.56E-33	3.70E-31
OR1L8	-1.658104302	-2.481947369	9.57E-33	3.70E-31
AC105384.1	-2.043489814	-2.638728435	9.59E-33	3.71E-31
TCEAL2	-2.518611472	0.875715079	9.76E-33	3.77E-31
PITX1	4.530015395	3.980047713	9.84E-33	3.80E-31
AUNIP	2.330241249	1.490999668	1.09E-32	4.22E-31
SCN8A	2.906808362	2.289784798	1.11E-32	4.28E-31
HSF2BP	2.225175038	-0.016479466	1.17E-32	4.49E-31
AC092306.1	2.814265675	-0.187822575	1.19E-32	4.59E-31
JPT1	1.654321456	7.3017669	1.22E-32	4.69E-31
AC064805.1	-1.833423235	-2.371626518	1.23E-32	4.71E-31
B3GNTL1	1.175147344	3.010272882	1.24E-32	4.77E-31
BDNF	-2.343624239	1.383595804	1.26E-32	4.83E-31
GBAP1	1.624991627	1.802177873	1.27E-32	4.88E-31
AC092691.3	-4.365312977	-3.815428955	1.35E-32	5.19E-31
SELENOP	-1.566927391	5.926034367	1.36E-32	5.22E-31
VMP1	1.289193745	8.111675521	1.41E-32	5.41E-31
MYH11	-1.844513067	6.810738479	1.43E-32	5.48E-31
ALG1L	3.22999606	2.184757131	1.47E-32	5.61E-31
CHRNA5	3.606164641	1.336747062	1.51E-32	5.79E-31
MIR924HG	3.796578594	0.284688894	1.53E-32	5.85E-31
AC007128.1	5.711971373	-0.278283026	1.61E-32	6.14E-31
ABCB6	2.352658754	-0.126344502	1.62E-32	6.18E-31
PIF1	2.33234625	2.043225872	1.66E-32	6.32E-31
AC025271.4	-2.150858699	-1.52288826	1.66E-32	6.33E-31
AC015849.5	3.584381969	-0.726725431	1.75E-32	6.68E-31
SPRED3	2.474971925	1.835271283	1.80E-32	6.84E-31
YBX2	4.714675625	2.519581287	1.81E-32	6.87E-31
AC005041.3	1.877008137	-0.834695355	1.82E-32	6.90E-31
ANO7	1.848686623	1.758761126	1.82E-32	6.91E-31
ALG1L2	1.985929242	-0.41668192	1.85E-32	7.01E-31
LINC02721	-2.37215526	-3.668956666	1.89E-32	7.17E-31
WFDC3	3.927148221	3.473359753	1.90E-32	7.18E-31
AC008897.3	-1.671365324	-2.57837417	1.90E-32	7.19E-31
RSPO4	-2.305400667	1.773488041	1.91E-32	7.22E-31
AP003559.1	3.480808127	-0.331195735	1.98E-32	7.47E-31
CYP27B1	2.381517321	2.965735589	2.04E-32	7.69E-31
ACP6	1.278818168	4.795577026	2.07E-32	7.80E-31
HSH2D	1.42579529	4.476554122	2.07E-32	7.80E-31
PUS7	1.25545026	4.545415846	2.09E-32	7.89E-31
AC004921.1	-1.548330256	-0.872200947	2.13E-32	8.02E-31
PRDM5	-1.207326915	2.668586036	2.15E-32	8.08E-31
AC245041.2	-2.544759578	1.534383942	2.16E-32	8.11E-31
ERVFRD-1	-2.15562391	-1.050427924	2.29E-32	8.60E-31
TAS2R2P	5.179029604	-2.361189917	2.30E-32	8.63E-31
MIR9-1HG	5.237565911	2.045546655	2.45E-32	9.19E-31
LAMB2	-1.023137447	7.678722444	2.52E-32	9.44E-31
SYN2	-2.301301638	0.269860505	2.58E-32	9.66E-31
CLEC12A	-1.849196695	2.661709047	2.74E-32	1.03E-30
PRR11	2.233244192	4.420973263	2.82E-32	1.06E-30
ETS1	-1.196342377	7.018766809	3.05E-32	1.14E-30
AC026120.1	4.340548018	-1.489997669	3.15E-32	1.18E-30
CBX3	1.036497111	7.729842433	3.25E-32	1.22E-30
IL18R1	-1.514963196	2.742092987	3.26E-32	1.22E-30
RTN1	-1.605331956	3.155651499	3.28E-32	1.22E-30
CENPL	1.397117037	3.243383668	3.51E-32	1.31E-30
JPT2	1.095534109	7.309811525	3.51E-32	1.31E-30
TMEM63C	3.978924154	3.523754018	3.63E-32	1.35E-30
TRIM59	1.510198487	3.308860585	3.68E-32	1.37E-30
TFAP2A-AS1	2.847524293	-1.03974588	3.72E-32	1.38E-30
PDCD2L	1.538190352	2.188827958	3.80E-32	1.41E-30
SORBS3	-1.168521043	6.145577332	3.87E-32	1.44E-30
AC099850.1	-1.178679115	-0.448068683	3.98E-32	1.48E-30
AF131215.7	-2.202512387	-2.273300476	4.00E-32	1.48E-30
TOX2	-1.559063479	3.179993382	4.06E-32	1.50E-30
RPP40	1.543729166	2.429664698	4.07E-32	1.51E-30
ZBTB16	-2.413541893	5.136192069	4.28E-32	1.58E-30
SEMA6A-AS2	-1.878725669	-3.000456999	4.30E-32	1.59E-30
RADX	-1.711313753	1.656211695	4.50E-32	1.66E-30
AC093510.2	-1.672794935	-2.566821099	4.72E-32	1.74E-30
LINC01614	3.662259185	1.007405327	5.04E-32	1.86E-30
LINC01914	-1.829921693	-1.00396765	5.21E-32	1.92E-30
CHTF18	1.791763784	4.087462152	5.81E-32	2.14E-30
AKR7A3	5.30630622	3.327484795	6.30E-32	2.32E-30
LINC00896	3.296300874	-0.221837998	6.32E-32	2.32E-30
TSPAN12	-1.308202698	5.693735657	6.35E-32	2.33E-30
TFB2M	1.173510045	4.628203263	6.36E-32	2.33E-30
NPNT	-1.805269829	6.643660308	6.66E-32	2.44E-30
DUOXA1	-2.019292558	3.999203915	6.76E-32	2.48E-30
PPFIBP1	-1.131653832	5.787173377	6.76E-32	2.48E-30
PC	1.713066722	5.314519471	7.75E-32	2.84E-30
HMGA1	2.287845716	8.091475433	7.87E-32	2.88E-30
CD33	-1.461597352	2.875166671	8.33E-32	3.05E-30
TIMM8A	1.172625255	3.03059663	9.37E-32	3.42E-30
RBBP8NL	2.078594703	2.372198193	1.01E-31	3.69E-30
MS4A14	-1.626040343	1.598070565	1.03E-31	3.76E-30
GPR19	2.405798192	0.260058995	1.05E-31	3.84E-30
ZNF692	1.600326255	4.88334958	1.07E-31	3.90E-30
FLRT3	-1.801832659	5.889948419	1.09E-31	3.95E-30
AF131215.5	-1.678322892	1.038272015	1.09E-31	3.95E-30
MRPL3	1.038566597	6.374360106	1.10E-31	3.99E-30
AL157838.1	2.411793982	0.814380203	1.11E-31	4.05E-30
ZCCHC24	-1.050565266	4.905848842	1.18E-31	4.27E-30
CYP3A7	-2.23727088	-2.47775907	1.21E-31	4.40E-30
VASH1	-1.132040581	4.27062832	1.23E-31	4.46E-30
AC018755.4	-1.700319227	-0.448983105	1.24E-31	4.49E-30
NHSL2	-1.318804564	3.568691977	1.24E-31	4.49E-30
LINC00862	3.183442108	0.294616768	1.29E-31	4.67E-30
CP	3.505522673	8.430395073	1.33E-31	4.83E-30
AC004112.1	-1.654085648	-2.05303863	1.36E-31	4.91E-30
CCDC169	2.860342062	0.430366563	1.39E-31	5.03E-30
SEC14L3	-3.101465947	0.301984594	1.43E-31	5.17E-30
STON1	-1.226319955	3.227942249	1.44E-31	5.21E-30
FOXD2-AS1	1.633865448	2.189682814	1.52E-31	5.46E-30
FHL2	2.343530935	6.044803628	1.53E-31	5.51E-30
GFRA2	-1.718565337	0.737210012	1.59E-31	5.71E-30
AC091564.5	-1.677141607	-2.562617138	1.63E-31	5.88E-30
LPXN	-1.11567979	4.845413336	1.67E-31	6.01E-30
ZNF331	-1.221045676	4.909916862	1.71E-31	6.14E-30
BPHL	1.271650729	3.838279682	1.82E-31	6.53E-30
AC117488.1	-1.769722549	-1.828523064	1.83E-31	6.55E-30
ECRG4	-2.567281966	1.84517503	1.83E-31	6.58E-30
SERPINA2	-3.170730369	-3.947870521	1.84E-31	6.60E-30
SPRING1	-1.060516269	6.816493303	1.89E-31	6.78E-30
AL135841.1	-2.393330676	-3.456859515	1.91E-31	6.84E-30
AC084864.1	3.183630134	-2.531587732	1.96E-31	7.01E-30
APOL3	-1.323051467	5.461464683	1.96E-31	7.02E-30
NPM3	1.674601561	4.544241072	2.05E-31	7.32E-30
ARHGAP40	3.657415668	3.401988579	2.10E-31	7.51E-30
SPDEF	3.266675074	5.384655587	2.19E-31	7.80E-30
FAM172BP	3.893156955	-0.53970098	2.24E-31	8.00E-30
AC019131.2	-1.103594027	-0.191316436	2.33E-31	8.32E-30
ATF3	-1.772357167	6.186350978	2.38E-31	8.47E-30
TBX15	3.721957547	3.433929922	2.39E-31	8.53E-30
KRT80	2.449497732	5.986140093	2.47E-31	8.80E-30
TACC3	1.659825212	5.712042939	2.61E-31	9.27E-30
PSMG3	1.529998811	5.392615502	2.61E-31	9.28E-30
AC013268.3	3.621732907	-0.877190877	2.63E-31	9.33E-30
ARID5A	-1.090200551	4.904413635	2.75E-31	9.77E-30
ADGRF4	4.490931899	2.643377408	2.76E-31	9.78E-30
SLC7A5	2.663070902	6.988066027	2.77E-31	9.82E-30
LDB3	-1.623253362	0.953450068	2.77E-31	9.83E-30
MS4A2	-1.92845897	2.660678256	2.78E-31	9.83E-30
FGD3	-1.188399599	4.190281536	2.80E-31	9.92E-30
AL133215.2	2.027819815	-1.220064887	2.98E-31	1.05E-29
CCN4	2.194391042	4.39486692	3.06E-31	1.08E-29
MIR4717	-2.726242551	-4.227991537	3.14E-31	1.11E-29
LAMC3	-1.678124139	4.500031253	3.18E-31	1.12E-29
WWTR1	-1.039062226	6.665539367	3.19E-31	1.13E-29
SLC15A2	-1.627647656	5.037794657	3.38E-31	1.19E-29
AC027228.2	3.841329521	0.424715081	3.71E-31	1.31E-29
SPDL1	1.289864959	3.61760175	3.86E-31	1.36E-29
LARGE2	2.458995211	5.147869272	3.90E-31	1.37E-29
NRG3	-2.404366521	-0.687609594	4.30E-31	1.51E-29
MMP13	6.157026288	5.052526343	4.39E-31	1.54E-29
FGF14-AS2	-1.593374384	0.505187534	4.47E-31	1.57E-29
RPS10	1.716983185	0.696898203	4.52E-31	1.58E-29
EGR3	-1.751734416	3.439092019	4.63E-31	1.62E-29
AC145207.9	2.40828821	-1.319594763	5.10E-31	1.78E-29
PLPP4	4.060998703	1.396458266	5.15E-31	1.80E-29
TMEM79	1.337619365	3.21616948	5.56E-31	1.94E-29
LY6G6F	-3.034020076	-4.339534144	5.62E-31	1.96E-29
AC105001.1	-1.390323039	-1.294796387	5.73E-31	2.00E-29
GYG2	2.231087788	3.664126566	5.78E-31	2.01E-29
NOSTRIN	-1.522844736	4.067508893	6.13E-31	2.13E-29
AC092115.3	2.861551814	-1.169119129	6.18E-31	2.15E-29
LINC01031	-1.780358201	-2.154194858	6.67E-31	2.32E-29
CYP4B1	-2.542349414	7.32165251	6.88E-31	2.39E-29
GMPPA	1.0068817	5.785652436	6.95E-31	2.41E-29
AC025580.1	4.076050224	1.960891263	7.06E-31	2.45E-29
MITF	-1.194032409	4.148640728	7.36E-31	2.55E-29
SLITRK2	-2.442309353	-0.578977997	7.38E-31	2.56E-29
CLDN10-AS1	6.422649697	0.795730405	7.50E-31	2.60E-29
F11	-2.856805248	1.189317799	7.58E-31	2.62E-29
HMGCLL1	-1.826707349	0.611284364	7.59E-31	2.63E-29
E2F7	2.729137565	2.185962265	7.88E-31	2.72E-29
HHIPL2	6.045119715	3.308813099	7.94E-31	2.75E-29
MARVELD3	1.465826689	4.005148021	8.25E-31	2.85E-29
FAM83D	2.258258512	3.896940934	8.49E-31	2.93E-29
TLL1	-1.595143442	1.891606254	8.52E-31	2.94E-29
CASKIN1	3.588784215	0.104412226	8.53E-31	2.94E-29
STEAP1	2.82635922	4.614406878	9.09E-31	3.13E-29
MROH6	2.439588985	5.46233277	9.24E-31	3.18E-29
TRGV6	-2.065740993	-3.435658552	9.33E-31	3.21E-29
KCNK3	-2.21273636	4.346308294	9.33E-31	3.21E-29
AC120036.1	5.219384987	-0.907863778	9.43E-31	3.24E-29
HSPD1	1.287920027	8.425073268	9.58E-31	3.29E-29
ZNF138	1.146958956	3.373342813	9.72E-31	3.34E-29
AC012513.3	-1.264066572	0.712269687	9.92E-31	3.40E-29
CETP	-1.191647199	1.169069621	1.01E-30	3.47E-29
SLC2A1-AS1	2.412756091	-0.5075188	1.11E-30	3.80E-29
ADCK5	1.632508664	3.793314135	1.16E-30	3.99E-29
FBXO32	2.088598013	6.052839293	1.17E-30	4.01E-29
MRM1	1.258472661	3.175004918	1.17E-30	4.01E-29
P4HA3	2.231050306	2.84223661	1.27E-30	4.33E-29
SCAT8	3.940269752	1.480693765	1.32E-30	4.51E-29
ZNF695	4.259148798	-0.175395677	1.32E-30	4.52E-29
CADM3-AS1	-2.137860304	-0.703125545	1.38E-30	4.70E-29
AC092834.1	-2.837845809	-3.367470102	1.46E-30	4.97E-29
C11orf86	7.943545401	1.597659492	1.59E-30	5.42E-29
BOP1	1.697254379	5.964417194	1.68E-30	5.73E-29
SERTAD1	-1.241672237	4.954140714	1.69E-30	5.77E-29
TARS2	1.033255592	5.380011734	1.72E-30	5.87E-29
PTX3	-2.079734916	1.810090462	1.83E-30	6.21E-29
MCM6	1.456342692	5.806640297	1.85E-30	6.29E-29
TLCD1	1.751122262	4.290190938	1.85E-30	6.30E-29
CEACAM1	2.040526615	5.656593287	1.98E-30	6.71E-29
SH2B3	-1.000015368	5.238328064	1.98E-30	6.72E-29
PFKP	2.130884444	7.139209057	2.00E-30	6.78E-29
SBK1	2.545089669	4.973907532	2.08E-30	7.05E-29
PGM5-AS1	-2.253778577	-2.760590204	2.08E-30	7.05E-29
LINC01711	3.833935909	-1.532517585	2.22E-30	7.50E-29
BARX2	3.899319367	3.533377911	2.28E-30	7.73E-29
ITIH3	-1.488208688	0.987712276	2.33E-30	7.89E-29
C1QA	-1.570052554	7.990861915	2.41E-30	8.14E-29
COL1A1	2.888139172	11.54732166	2.56E-30	8.64E-29
CA9	5.627751641	4.300243243	2.72E-30	9.17E-29
LAD1	1.949652404	6.610685126	2.72E-30	9.18E-29
GFPT1	1.143695813	7.59812947	2.96E-30	9.98E-29
TYMSOS	2.357935342	-1.163051289	3.01E-30	1.01E-28
MMP1	5.257218788	6.59134765	3.15E-30	1.06E-28
PLAC1	4.759907128	-0.090762357	3.18E-30	1.07E-28
AC104260.2	-1.932235866	-2.355130232	3.24E-30	1.09E-28
AC111152.2	-1.672797232	-2.721631052	3.33E-30	1.12E-28
SIRPA	-1.258209901	6.136833116	3.40E-30	1.14E-28
HRCT1	-1.745351752	1.018786202	3.47E-30	1.16E-28
AC024337.2	-1.741420638	-1.58298243	3.60E-30	1.21E-28
LINC02709	2.072133515	-0.309663858	3.63E-30	1.22E-28
HPDL	3.386978486	1.083110357	3.98E-30	1.33E-28
H2BC6	3.401324756	0.543420925	3.99E-30	1.34E-28
NPSR1-AS1	5.847117821	-1.369207377	4.01E-30	1.34E-28
ADAM8	2.133006107	6.106410714	4.09E-30	1.37E-28
MFSD2A	-1.622141775	5.865840512	4.16E-30	1.39E-28
ANKRD33B	-1.723562257	2.417139932	4.26E-30	1.42E-28
PKP3	1.570031667	6.389587905	4.62E-30	1.54E-28
CDKL5	-1.090868897	4.59395758	4.66E-30	1.55E-28
ATP1B2	-1.590882734	1.49949142	4.67E-30	1.56E-28
AL365181.3	4.418578076	3.595485804	4.87E-30	1.62E-28
AC006525.1	5.641591117	-1.869929598	4.98E-30	1.66E-28
HPCAL1	-1.098298996	6.565928169	5.08E-30	1.69E-28
SFTPA2	-2.673261697	12.4474168	5.12E-30	1.70E-28
DTL	1.848027135	4.040189993	5.20E-30	1.73E-28
GAPDH	1.67255261	10.30966714	5.87E-30	1.95E-28
AC091588.3	-2.090183844	-2.316740953	6.07E-30	2.01E-28
DCN	-1.471674796	8.95505556	6.13E-30	2.03E-28
C5orf64	-1.84583091	-2.73512063	6.32E-30	2.09E-28
HCN3	1.736002283	2.506174754	6.32E-30	2.09E-28
DARS2	1.216635072	5.192111545	6.41E-30	2.12E-28
BMPER	-2.229351727	2.041973633	6.64E-30	2.19E-28
PRAME	7.498491894	4.602888563	6.65E-30	2.20E-28
LIPA	-1.264780854	7.564652941	6.82E-30	2.25E-28
AC023593.1	3.81168115	-2.474942188	7.05E-30	2.33E-28
PPP1R14B-AS1	2.590325584	-2.225835768	7.22E-30	2.38E-28
SATB2-AS1	2.952091908	-0.142284897	7.36E-30	2.43E-28
BEAN1	2.86345935	3.186007573	7.40E-30	2.44E-28
SLC19A1	-1.033231007	5.043150273	7.45E-30	2.46E-28
CDC14A	-1.075641047	3.111516972	7.73E-30	2.55E-28
MAGI1	-1.094663605	5.016909821	7.76E-30	2.55E-28
PODXL	-1.096069551	6.54605285	8.75E-30	2.88E-28
NUP155	1.311439227	5.837348127	8.80E-30	2.89E-28
SNX25	-1.238155664	5.392794235	9.47E-30	3.11E-28
PRR19	2.161932355	0.872133385	9.86E-30	3.23E-28
FAM167A	-1.914539161	4.153708361	1.02E-29	3.34E-28
AL132712.2	1.640998782	0.543166445	1.03E-29	3.37E-28
FANCB	1.778907792	0.684547537	1.14E-29	3.75E-28
NFIX	-1.457814281	6.602720998	1.16E-29	3.79E-28
PARD3B	-1.15117231	4.251759211	1.16E-29	3.79E-28
BMP2	-1.762511794	5.068738614	1.21E-29	3.96E-28
AC090844.3	-2.28352079	-3.513285863	1.27E-29	4.15E-28
FBXO43	2.2947612	-0.23479078	1.31E-29	4.29E-28
SIGLEC17P	-1.738606504	0.621368514	1.32E-29	4.32E-28
Z84485.1	2.208298607	-0.043525736	1.43E-29	4.65E-28
AL121949.2	5.9192975	0.220083414	1.44E-29	4.69E-28
ONECUT2	4.905809784	2.234207675	1.46E-29	4.77E-28
TMED2-DT	1.582260259	1.668470833	1.53E-29	4.98E-28
CLCN2	1.287829603	2.594830188	1.54E-29	5.01E-28
AL136369.1	-3.193344514	-2.714442912	1.54E-29	5.02E-28
TRHDE	-2.668387354	1.198475386	1.56E-29	5.08E-28
CCNE2	1.89102218	2.023778563	1.57E-29	5.11E-28
RAD51AP1	2.044470585	3.325089077	1.68E-29	5.47E-28
SH2D1B	-1.804072439	0.088389272	1.77E-29	5.76E-28
CD302	-1.43772285	3.2252969	1.93E-29	6.25E-28
FUT3	2.321674829	4.92988263	2.04E-29	6.62E-28
CSP2	-1.695862405	-2.920383753	2.06E-29	6.68E-28
THEMIS2	-1.11489989	5.814205167	2.11E-29	6.84E-28
APBB2	-1.013639165	5.319762901	2.12E-29	6.86E-28
GAD1	3.742443292	1.822980702	2.15E-29	6.93E-28
RPL7AP64	-1.555549097	-1.118245469	2.16E-29	6.99E-28
XPO5	1.023485186	5.830664488	2.18E-29	7.04E-28
NAT9	1.05470311	5.267471427	2.23E-29	7.19E-28
CST1	6.436821634	4.425813229	2.26E-29	7.29E-28
AP005233.2	6.094322538	-0.266914436	2.28E-29	7.35E-28
AC006033.2	-1.38416991	-0.339006671	2.32E-29	7.48E-28
BAIAP2L2	3.668930464	2.746431676	2.33E-29	7.51E-28
SLCO2B1	-1.44771994	6.768516186	2.54E-29	8.17E-28
B4GALT2	1.19608613	6.025606331	2.65E-29	8.52E-28
SEL1L2	-2.471172608	-3.759402336	2.73E-29	8.77E-28
MNDA	-1.462393436	4.552821826	2.87E-29	9.20E-28
SPP2	7.365923942	0.420521386	2.99E-29	9.60E-28
AOC1	4.968059545	5.373184349	3.00E-29	9.61E-28
AL135902.1	-2.374864653	-3.93968595	3.01E-29	9.66E-28
MTURN	-1.294070657	5.379302457	3.03E-29	9.72E-28
HYLS1	1.27117969	2.768898533	3.18E-29	1.02E-27
ADAM28	2.258340664	5.202885288	3.18E-29	1.02E-27
CNKSR2	-1.819648505	1.232160896	3.34E-29	1.07E-27
UBE2FP1	-1.16770539	-0.991438956	3.49E-29	1.12E-27
ARHGAP30	-1.164267076	5.54091218	3.52E-29	1.12E-27
ZNF217	1.318748312	6.459445973	3.84E-29	1.23E-27
AP003385.2	-2.797317536	-4.257928358	3.85E-29	1.23E-27
THBS2	2.942142952	6.630383316	3.89E-29	1.24E-27
ST14	1.473716991	8.292696861	3.95E-29	1.26E-27
AC244033.2	1.617333839	1.568638042	4.30E-29	1.37E-27
PPP5D1	-1.080355347	-0.716490583	4.35E-29	1.39E-27
AC113189.3	3.260495042	-0.628711453	4.37E-29	1.39E-27
AC007671.1	-1.985528615	-2.439405833	4.38E-29	1.39E-27
EVI2B	-1.259705372	4.7242824	4.38E-29	1.39E-27
FCN1	-1.75741673	4.15243361	4.41E-29	1.40E-27
AL356056.2	-1.887794762	-2.184912508	4.74E-29	1.51E-27
ETV5	-1.1849589	5.843394199	4.80E-29	1.52E-27
C1QB	-1.59195802	8.27748695	4.82E-29	1.53E-27
BHLHA15	2.943912636	3.820975995	4.87E-29	1.54E-27
PIK3R5	-1.250883963	4.149684748	4.91E-29	1.56E-27
ITGA11	2.853683814	5.523059768	5.11E-29	1.62E-27
GHET1	1.758216534	-0.512785965	5.18E-29	1.64E-27
MIS18A	1.23621524	3.70294057	5.28E-29	1.67E-27
AL121832.3	2.214592311	-0.025863367	5.35E-29	1.69E-27
SCN2B	-1.905293026	0.881247354	5.41E-29	1.71E-27
GSG1L	-2.425242061	-2.579891388	5.42E-29	1.71E-27
GPC2	3.38227339	1.479868027	5.50E-29	1.74E-27
AL365181.2	5.308525228	2.348592049	5.56E-29	1.75E-27
NETO1	4.758059814	0.708482681	5.74E-29	1.81E-27
SULF1	2.550675225	7.481035117	5.92E-29	1.87E-27
AC009065.5	3.635280856	-0.127336758	6.13E-29	1.93E-27
HVCN1	-1.110540709	2.812842632	6.31E-29	1.99E-27
LSAMP	-1.472450769	3.965808183	6.36E-29	2.00E-27
SRPK3	3.122645559	2.523493097	6.54E-29	2.06E-27
PABPC1L	2.109411881	5.092688399	6.66E-29	2.09E-27
BCL9	1.300247735	5.677646764	6.95E-29	2.18E-27
AL355974.1	-2.658706296	-3.992044779	7.40E-29	2.32E-27
PIK3IP1	-1.037073788	5.997331511	7.40E-29	2.32E-27
AC000082.1	-2.382239083	-2.622636411	7.90E-29	2.48E-27
GOLGA7B	2.701395761	4.66323248	8.05E-29	2.52E-27
SPINK1	6.592816171	7.638009377	8.44E-29	2.64E-27
PHLDA2	2.304840323	4.905724806	8.85E-29	2.77E-27
FGF11	3.248688883	-1.414072505	8.87E-29	2.78E-27
HEATR1	1.058363206	5.550881853	8.88E-29	2.78E-27
EPB41L4A-DT	-1.236492818	-0.031005037	8.96E-29	2.80E-27
COL3A1	2.520255647	11.10910451	9.00E-29	2.81E-27
TNFSF11	4.062213855	1.410360642	9.03E-29	2.82E-27
SLC31A2	-1.367082098	-0.931117043	9.08E-29	2.83E-27
LGSN	4.534962165	4.389119166	9.25E-29	2.88E-27
AL645608.8	3.987057891	-1.689388757	9.64E-29	3.00E-27
RAB19	1.496534295	2.391009716	9.71E-29	3.02E-27
SHMT2	1.478789082	6.719749248	9.76E-29	3.03E-27
FAM189A1	-2.14415412	0.567330324	1.03E-28	3.19E-27
AC130371.2	-1.503312901	-0.415631261	1.03E-28	3.20E-27
BRIX1	1.224279825	5.317962342	1.08E-28	3.35E-27
LHX6	-1.443524664	1.974380223	1.09E-28	3.38E-27
AC067817.2	-1.73039839	-1.954366697	1.10E-28	3.42E-27
COL24A1	1.916849868	1.954722458	1.12E-28	3.48E-27
POC1A	1.564176268	3.296338263	1.20E-28	3.70E-27
RUSC1	1.165022588	5.786994958	1.26E-28	3.89E-27
LPL	-2.079985694	6.312629738	1.28E-28	3.94E-27
SCD5	-1.599149509	4.487363705	1.32E-28	4.09E-27
ZNF107	1.254962876	3.976113079	1.38E-28	4.25E-27
SLFN13	1.577348134	5.530925549	1.41E-28	4.35E-27
H2AC13	4.880813107	0.514237003	1.42E-28	4.36E-27
FBXO41	1.688021555	3.875537573	1.52E-28	4.68E-27
CHEK2	1.466725817	3.878994738	1.52E-28	4.68E-27
IL5RA	-2.131374917	1.563508435	1.57E-28	4.83E-27
TNFRSF18	2.646561262	3.05223882	1.64E-28	5.04E-27
Z97989.1	-1.165154248	-0.106896968	1.71E-28	5.26E-27
EHD2	-1.280035937	7.522615971	1.74E-28	5.32E-27
TYROBP	-1.491358588	6.625392523	1.77E-28	5.41E-27
ATAT1	1.248985163	3.901589545	1.78E-28	5.45E-27
AK4	2.581900595	4.766080441	1.84E-28	5.63E-27
MYOM2	-1.552006994	1.11303278	1.85E-28	5.68E-27
B3GNT6	5.723947858	4.232844639	1.86E-28	5.71E-27
DBF4	1.398638989	3.858561329	1.90E-28	5.81E-27
LINC02346	-2.596542302	-3.428265217	1.95E-28	5.96E-27
DUSP1	-1.579263434	8.67452111	1.96E-28	6.00E-27
NCKAP1L	-1.284437054	5.889744618	2.03E-28	6.19E-27
HASPIN	1.91014445	1.324963141	2.04E-28	6.23E-27
CIP2A	1.952578768	3.280476027	2.07E-28	6.31E-27
PRELP	-1.579961099	6.657449674	2.09E-28	6.37E-27
RUNX2	1.607822605	4.298375646	2.18E-28	6.65E-27
IMPDH1P8	2.60075489	-1.801686055	2.29E-28	6.97E-27
AC008496.3	6.603035825	3.3567554	2.29E-28	6.97E-27
CYP4A22-AS1	2.529586049	-1.482355708	2.30E-28	7.01E-27
VIL1	6.958757823	4.671231702	2.36E-28	7.19E-27
AL354707.1	2.886083186	0.83586894	2.46E-28	7.47E-27
TMEM105	2.182163295	1.843232356	2.46E-28	7.48E-27
CELF2	-1.214370916	6.491983054	2.89E-28	8.77E-27
PTPRO	-1.443193065	3.186246713	2.92E-28	8.85E-27
CNFN	2.657336069	1.352078793	2.93E-28	8.87E-27
LINC01460	3.891867555	0.363253256	3.06E-28	9.28E-27
PSMD10P2	5.239507273	-1.066399829	3.12E-28	9.45E-27
FOS	-1.690791016	8.700082261	3.14E-28	9.50E-27
IKBKE	1.155154619	4.216464718	3.17E-28	9.59E-27
ARHGAP29	-1.204869988	6.084825405	3.21E-28	9.69E-27
LINC02159	4.256137104	1.03489543	3.31E-28	9.98E-27
TMEM132A	2.018781	5.803824069	3.40E-28	1.03E-26
HPCA	2.563824762	-0.925849301	3.45E-28	1.04E-26
NAP1L5	-1.025278721	2.124778392	3.55E-28	1.07E-26
LINC00634	3.706563457	-1.919723601	3.56E-28	1.07E-26
AL773573.1	-3.272998399	-3.407664755	3.57E-28	1.08E-26
AC022210.1	1.742532453	0.127696983	3.72E-28	1.12E-26
LRRC37A9P	3.696442503	-1.921658581	3.73E-28	1.12E-26
SRD5A1	1.547009226	4.901534513	3.73E-28	1.12E-26
AF131215.6	-1.597649356	0.676585048	3.76E-28	1.13E-26
SLC5A6	1.146288066	5.186171147	3.78E-28	1.14E-26
GARS1	1.062987959	7.068402607	4.00E-28	1.20E-26
FLVCR1	1.222518792	4.627631246	4.21E-28	1.26E-26
MCM2	1.955316993	4.82098176	4.26E-28	1.28E-26
TPRG1	-1.484305731	2.443345166	4.28E-28	1.28E-26
WNT2B	-1.258528647	2.189646042	4.45E-28	1.33E-26
VIM	-1.157815442	8.923988834	4.48E-28	1.34E-26
DCST2	2.324847853	1.24724796	4.60E-28	1.38E-26
ADCY8	-3.372800229	-0.228888843	4.69E-28	1.40E-26
TPPP	-1.718006867	4.561674503	4.82E-28	1.44E-26
LINC01208	4.507015503	-1.820622182	4.86E-28	1.45E-26
RPL23AP32	-2.185139203	-2.700179255	4.91E-28	1.46E-26
HYAL1	-1.895215479	4.659345716	5.00E-28	1.49E-26
AC027277.2	-2.156449971	-1.658640947	5.10E-28	1.52E-26
GTF2IP7	3.005625208	-0.261730788	5.56E-28	1.66E-26
COL22A1	3.57927687	2.509940962	5.80E-28	1.73E-26
MSMO1	-1.097844783	6.573653038	5.84E-28	1.74E-26
IRAK1	1.203429399	7.490435936	5.95E-28	1.77E-26
SNHG3	1.530253152	4.623134097	5.97E-28	1.77E-26
ENPP2	-1.309001226	6.1399289	6.02E-28	1.79E-26
DUS1L	1.191103357	6.777118024	6.12E-28	1.81E-26
RXRG	-2.368680133	1.052969848	6.25E-28	1.85E-26
UQCC2	1.470261312	5.406419333	6.42E-28	1.90E-26
FAP	2.295375322	4.370105522	6.54E-28	1.94E-26
PROC	3.980696289	2.236619419	6.74E-28	2.00E-26
GRID1	-1.447692105	0.900414835	6.94E-28	2.05E-26
CCDC185	4.492688788	-1.197287229	6.95E-28	2.06E-26
AL354714.3	-2.92170689	-2.604320705	7.07E-28	2.09E-26
AC027307.3	-1.33916966	-1.598668312	7.13E-28	2.11E-26
LRRC37A14P	-1.89303313	-3.190081111	7.16E-28	2.12E-26
RAC3	2.311044856	3.88126928	7.29E-28	2.15E-26
OIP5	2.044372767	-0.177946072	7.33E-28	2.16E-26
ACSS3	-1.63973104	3.891033886	7.51E-28	2.21E-26
FUT8	1.422447018	6.027565117	7.54E-28	2.22E-26
C11orf91	-2.054258388	-2.489764783	7.74E-28	2.28E-26
TUBA5P	2.375160061	2.639136998	7.84E-28	2.31E-26
AC099066.2	2.676213121	-0.35308948	8.21E-28	2.41E-26
CLPSL2	5.311279145	-0.72526113	8.52E-28	2.50E-26
AC010719.1	2.854477764	0.18354635	8.53E-28	2.51E-26
FHDC1	-1.163935355	4.856101315	8.75E-28	2.57E-26
FOXP3	1.85220851	2.407197049	8.97E-28	2.63E-26
PEBP4	-2.571043519	5.23515794	9.05E-28	2.65E-26
B3GNT4	2.80670537	1.176106704	9.21E-28	2.70E-26
BNIP5	5.434037187	1.137725531	9.87E-28	2.89E-26
HSPE1	1.332255748	4.414628385	1.03E-27	3.00E-26
AL356095.1	-2.683289621	-3.95509407	1.03E-27	3.00E-26
COCH	3.723243478	2.195491906	1.05E-27	3.07E-26
GNGT1	6.1371215	-0.233723936	1.05E-27	3.08E-26
MEIS1	-1.127888282	3.982991187	1.07E-27	3.13E-26
DLL3	6.836401975	2.071128059	1.11E-27	3.24E-26
SELENOI	1.258007369	5.852924883	1.14E-27	3.31E-26
NEGR1	-1.690842252	2.75110107	1.14E-27	3.32E-26
AC010998.1	-2.671801311	-1.902790644	1.18E-27	3.44E-26
AC093151.5	-2.921603368	-3.62624902	1.19E-27	3.46E-26
GRIN1	3.148063307	1.473925682	1.19E-27	3.46E-26
AC007920.2	-2.122874719	-2.508894118	1.22E-27	3.54E-26
TUBB6	-1.306353322	5.890075458	1.30E-27	3.79E-26
ARRDC4	-1.168700964	4.795026476	1.33E-27	3.85E-26
AC010226.1	-1.246076244	0.122166311	1.35E-27	3.91E-26
CDKL1	-1.034060816	2.708254099	1.37E-27	3.99E-26
SFRP5	-2.645232855	1.171200054	1.40E-27	4.07E-26
KCNJ5	-1.80115384	3.433852174	1.40E-27	4.07E-26
UACA	-1.041898617	5.583337901	1.42E-27	4.13E-26
EGLN3	3.034988702	6.075717223	1.45E-27	4.20E-26
AC026273.1	1.588305643	2.20502106	1.46E-27	4.24E-26
MROH3P	4.997778976	-0.218867997	1.49E-27	4.30E-26
LINC00942	6.743361809	3.670091802	1.52E-27	4.40E-26
FAM72B	2.364808597	0.169068069	1.58E-27	4.57E-26
SIGLEC16	-1.72150689	0.575004897	1.59E-27	4.59E-26
CHRNB4	3.288574649	-0.551256643	1.59E-27	4.61E-26
SLC29A4	3.093413626	4.812310223	1.66E-27	4.80E-26
NKAPL	-1.712632441	-1.078026858	1.67E-27	4.81E-26
ENDOU	-1.644699735	-1.858181823	1.74E-27	5.03E-26
ZMYND15	-1.205594661	2.904479554	1.75E-27	5.03E-26
AC138904.1	3.026274325	-0.411193398	1.85E-27	5.32E-26
NINJ2-AS1	-1.064084076	3.774191418	1.86E-27	5.36E-26
AL049871.1	-1.607178579	-3.00920674	1.87E-27	5.36E-26
TXNDC17	1.627212073	6.283069902	1.87E-27	5.37E-26
PNMA8C	-2.129321946	-1.909223716	1.88E-27	5.39E-26
NRN1	-1.686574318	3.404547101	1.88E-27	5.40E-26
ASAH2B	1.030828939	2.332288656	1.89E-27	5.42E-26
SLC52A2	1.427217606	6.164964024	1.92E-27	5.50E-26
LDHA	1.33893316	9.746469346	2.04E-27	5.85E-26
NKX1-2	7.476649937	0.963419558	2.07E-27	5.94E-26
CCND2	-1.303588356	5.525756442	2.14E-27	6.13E-26
GIPC3	-1.222987304	2.528856041	2.21E-27	6.33E-26
LINC00629	3.528495749	-1.732454204	2.21E-27	6.33E-26
AC130466.1	-2.225563734	-1.665759069	2.22E-27	6.35E-26
AC007128.2	5.722219943	-2.579681197	2.25E-27	6.44E-26
AKAP13	-1.055115456	7.57602804	2.29E-27	6.54E-26
AC119427.1	1.758615254	0.911472167	2.33E-27	6.65E-26
LRRK2	-2.048800026	7.182568779	2.35E-27	6.70E-26
AP003469.2	2.712592375	-1.230029477	2.54E-27	7.24E-26
TMTC4	1.19175317	4.895029186	2.54E-27	7.24E-26
CBX4	1.063173581	5.460853641	2.64E-27	7.52E-26
MGAT3-AS1	-2.41852484	-2.951603488	2.68E-27	7.65E-26
IL31RA	4.056379509	1.92930363	2.77E-27	7.90E-26
FGL1	7.223230514	5.455900844	2.83E-27	8.06E-26
TMEM220	-1.309854157	2.37571603	2.88E-27	8.20E-26
TPSAB1	-1.754882359	4.266394842	3.04E-27	8.65E-26
TCF4	-1.1489391	6.080995827	3.08E-27	8.77E-26
LINC02362	2.620263259	1.811722901	3.13E-27	8.88E-26
ST6GALNAC2	-1.655912928	2.055244931	3.14E-27	8.93E-26
SSTR1	-2.226988492	2.671490394	3.15E-27	8.95E-26
DECR2	1.353824497	4.165864707	3.16E-27	8.96E-26
ACY3	2.874795811	1.996807058	3.23E-27	9.16E-26
AC022007.1	1.297672629	2.098376874	3.28E-27	9.28E-26
LINC02185	-1.889377233	1.607913121	3.30E-27	9.34E-26
AL135786.1	-1.619654722	-3.114723195	3.50E-27	9.91E-26
MMP12	3.98437454	5.177289361	3.62E-27	1.02E-25
ATAD3B	1.464836066	4.806920745	3.70E-27	1.04E-25
MICALL2	1.586388543	5.723150258	3.74E-27	1.06E-25
AC138776.1	-2.031152124	-1.905279017	3.75E-27	1.06E-25
AL008628.1	-2.000634951	-3.364772845	3.86E-27	1.09E-25
PRDM12	3.010038263	-2.461909144	3.95E-27	1.11E-25
HAVCR1	5.185672823	1.521023738	3.97E-27	1.12E-25
[truncated: 16,213 more rows]
