# Supplementary material for: Transcriptome Analysis of the Inhibitory Effects of 20(S)-Protopanaxadiol on NCI-H1299 Non-Small Cell Lung Cancer Cells
Source: Molecules. 2023 Jul 29;28(15):5746. doi: 10.3390/molecules28155746 (PMC10421167; doi:10.3390/molecules28155746)
Supplement: Supplementary file 1 [file molecules-28-05746-s001.zip]

Archive with 13 entries (13 files):
- Figure S1 Molecular structures.pdf
- Figure S2.pdf
- Figure S3.pdf
- Figure S4 RNA analysis.pdf
- Figure S5 Sequencing depth of RNA sequencing.pdf
- Table S1 FPKM and Read counts of each transcript.xlsx
- Table S2 Genes expression changes of PPD vs Control.xlsx
- Table S3 Differentially expressed genes.xlsx
- Table S4 Enriched KEGG pathways of DEGs.xlsx
- Table S5 DEGs enriched in MAPK pathway.csv
- Table S6 Expression changed genes in MAPK pathway.xlsx
- Table S7 mRNA expression profiles of lung adenocarcinoma.xlsx
- Table S8 DEGs of lung adenocarcinoma.xls
