# Supplementary material for: Transcriptome Analysis of the Inhibitory Effects of 20(S)-Protopanaxadiol on NCI-H1299 Non-Small Cell Lung Cancer Cells
Source: Molecules. 2023 Jul 29;28(15):5746. doi: 10.3390/molecules28155746 (PMC10421167; doi:10.3390/molecules28155746)
Supplement: Supplementary file 1 [file molecules-28-05746-s001.zip › Table S5 DEGs enriched in MAPK pathway.csv]

	gene_id	GeneSymbol	logFC	PValue	FDR
CACNB3	ENSG00000167535	CACNB3	-0.794508768	1.29e-15	1.08e-13
CACNG4	ENSG00000075461	CACNG4	-0.955202545	2.09e-13	1.45e-11
RASGRP1	ENSG00000172575	RASGRP1	-1.264624484	0.00050091	0.008383007
EREG	ENSG00000124882	EREG	4.064199408	0	0
AREG	ENSG00000109321	AREG	3.520937743	7.91e-43	2.08e-40
FGF2	ENSG00000138685	FGF2	0.806834776	1.08e-36	2.26e-34
FGF21	ENSG00000105550	FGF21	6.441426894	2.76e-41	6.76e-39
BDNF	ENSG00000176697	BDNF	0.621890834	0.002871465	0.038373461
VEGFA	ENSG00000112715	VEGFA	1.061451219	2.38e-68	1.23e-65
EFNA2	ENSG00000099617	EFNA2	-1.383072055	0.007348753	0.014699351
EGFR	ENSG00000146648	EGFR	0.750266532	1.54e-39	3.55e-37
FGFR2	ENSG00000066468	FGFR2	-0.62624419	2.89e-14	2.17e-12
FGFR3	ENSG00000068078	FGFR3	-1.070976025	1.61e-19	1.67e-17
EPHA2	ENSG00000142627	EPHA2	1.278457969	9.19e-101	7.56e-98
ATF4	ENSG00000128272	ATF4	0.997233369	2.65e-75	1.47e-72
SRF	ENSG00000112658	SRF	-0.589557206	5.42e-18	5.27e-16
FOS	ENSG00000170345	FOS	1.759502002	1.85e-96	1.43e-93
IL1A	ENSG00000115008	IL1A	1.391636356	0.000231638	0.004235232
IL1R1	ENSG00000115594	IL1R1	-1.150637584	1.02e-07	3.63e-06
IL1RAP	ENSG00000196083	IL1RAP	0.750358137	7.03e-23	8.71e-21
GADD45A	ENSG00000116717	GADD45A	1.869490324	1.09e-135	1.43e-132
GADD45B	ENSG00000099860	GADD45B	0.783093631	1.84e-15	1.53e-13
MAP2K3	ENSG00000034152	MAP2K3	0.607728793	8.66e-15	6.88e-13
RPS6KA5	ENSG00000100784	RPS6KA5	1.047630964	4.89e-21	5.59e-19
JUN	ENSG00000177606	JUN	1.154968393	2.21e-52	8e-50
DDIT3	ENSG00000175197	DDIT3	3.213961074	5.6e-272	2.16e-268
DUSP1	ENSG00000120129	DUSP1	2.068728668	8.23e-245	2.98e-241
DUSP4	ENSG00000120875	DUSP4	1.427521394	3.91e-114	3.84e-111
DUSP8	ENSG00000184545	DUSP8	1.154447551	8.64e-21	9.72e-19
DUSP5	ENSG00000138166	DUSP5	2.703257422	2.31e-70	1.21e-67
DUSP6	ENSG00000139318	DUSP6	2.241879429	1.62e-16	1.46e-14
DUSP10	ENSG00000143507	DUSP10	0.64507062	2.86e-10	1.44e-08
HSPA8	ENSG00000109971	HSPA8	-1.245632253	1.2e-141	1.7e-138
HSPA1A	ENSG00000204389	HSPA1A	-2.053861517	3.44e-213	1.11e-209
HSPA1L	ENSG00000204390	HSPA1L	-1.395889614	4.79e-17	4.49e-15
HSPA1B	ENSG00000204388	HSPA1B	-1.88812498	7.04e-163	1.2e-159
HSPA6	ENSG00000173110	HSPA6	-2.057173507	8.1e-06	0.000203984
MECOM	ENSG00000085276	MECOM	-0.768958825	0.000669506	0.010807853
NR4A1	ENSG00000123358	NR4A1	1.462895097	1.28e-62	5.78e-60
NFKB2	ENSG00000077150	NFKB2	0.754403853	3.4e-22	4.07e-20
RELB	ENSG00000104856	RELB	0.814270692	1.61e-09	7.46e-08
