# Supplementary figures and images for: Transcriptome Analysis of the Inhibitory Effects of 20(S)-Protopanaxadiol on NCI-H1299 Non-Small Cell Lung Cancer Cells
Source: MDPI journal article supplement (doi:10.3390/molecules28155746), 2023-07-29

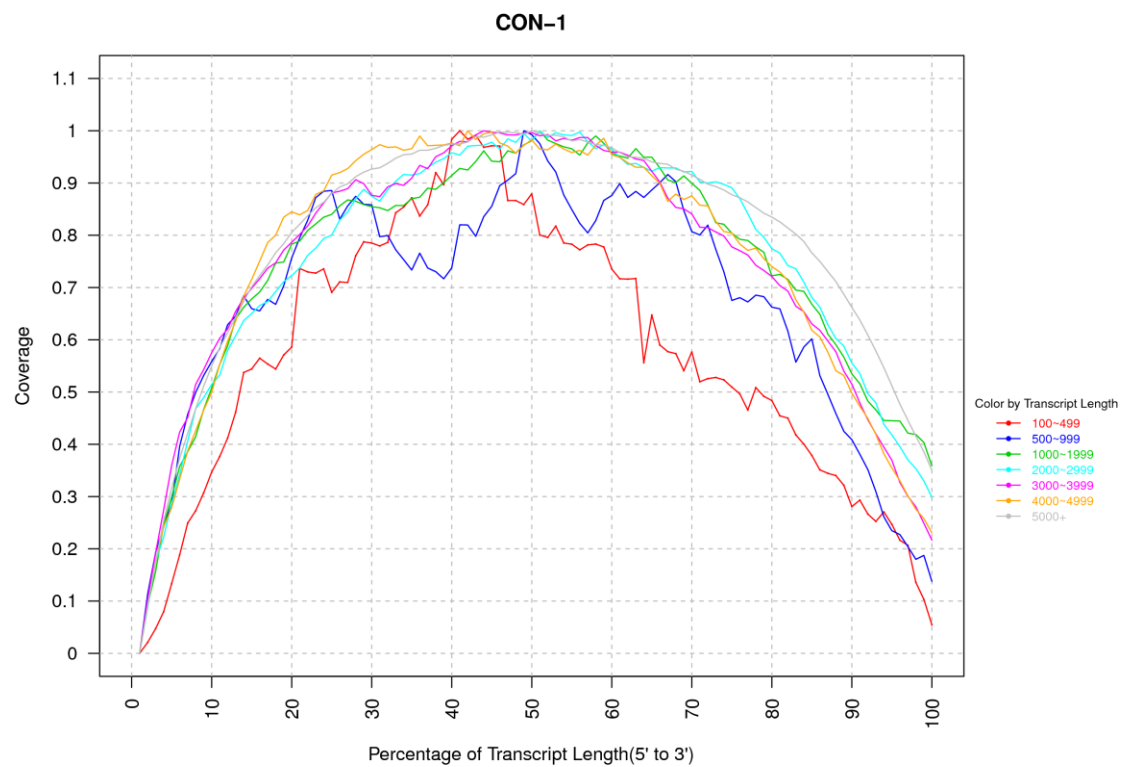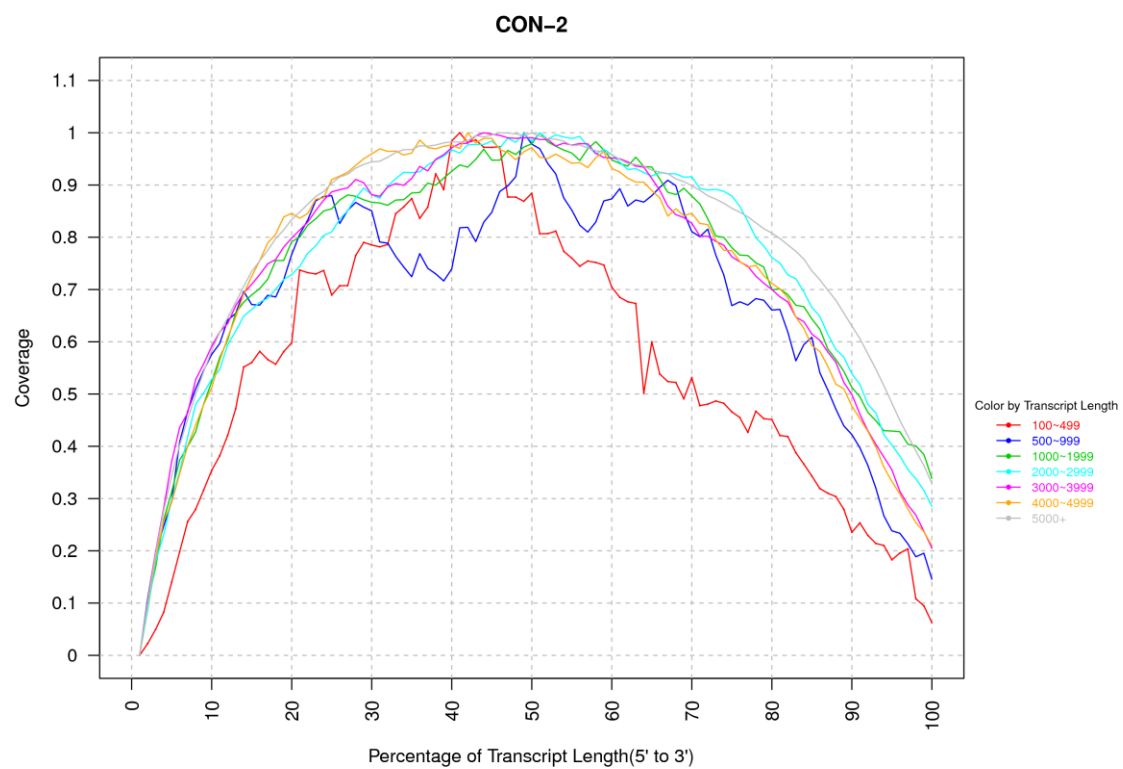

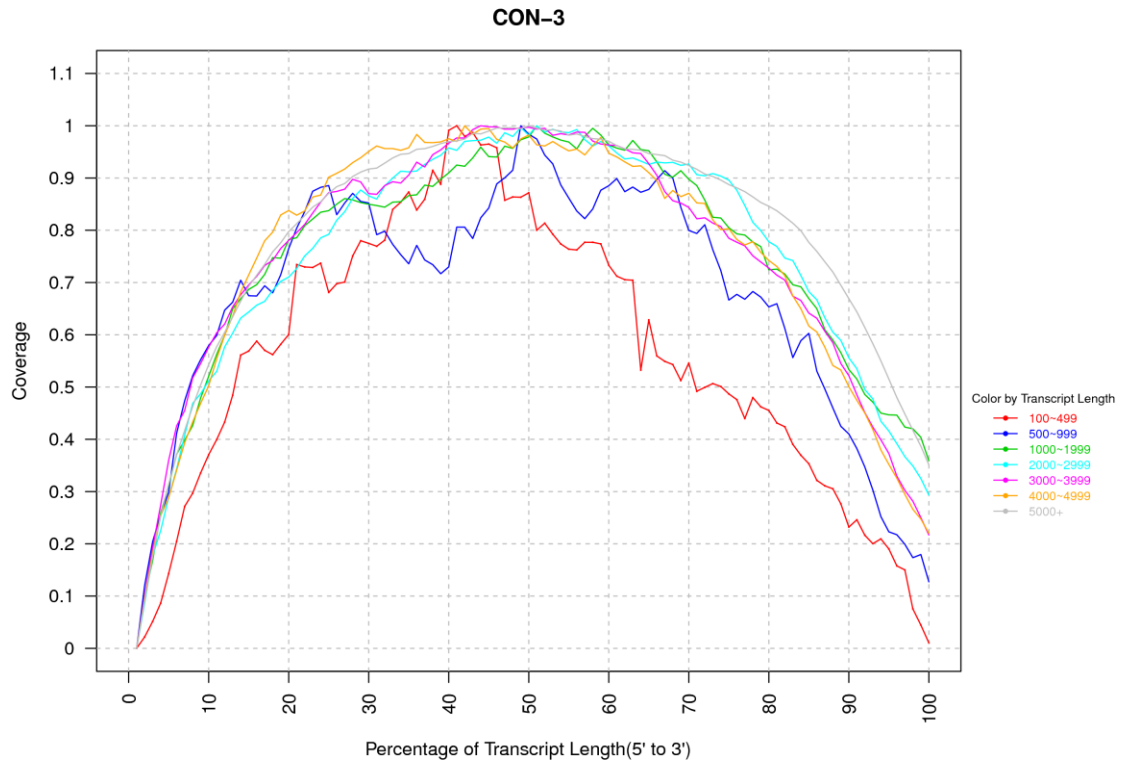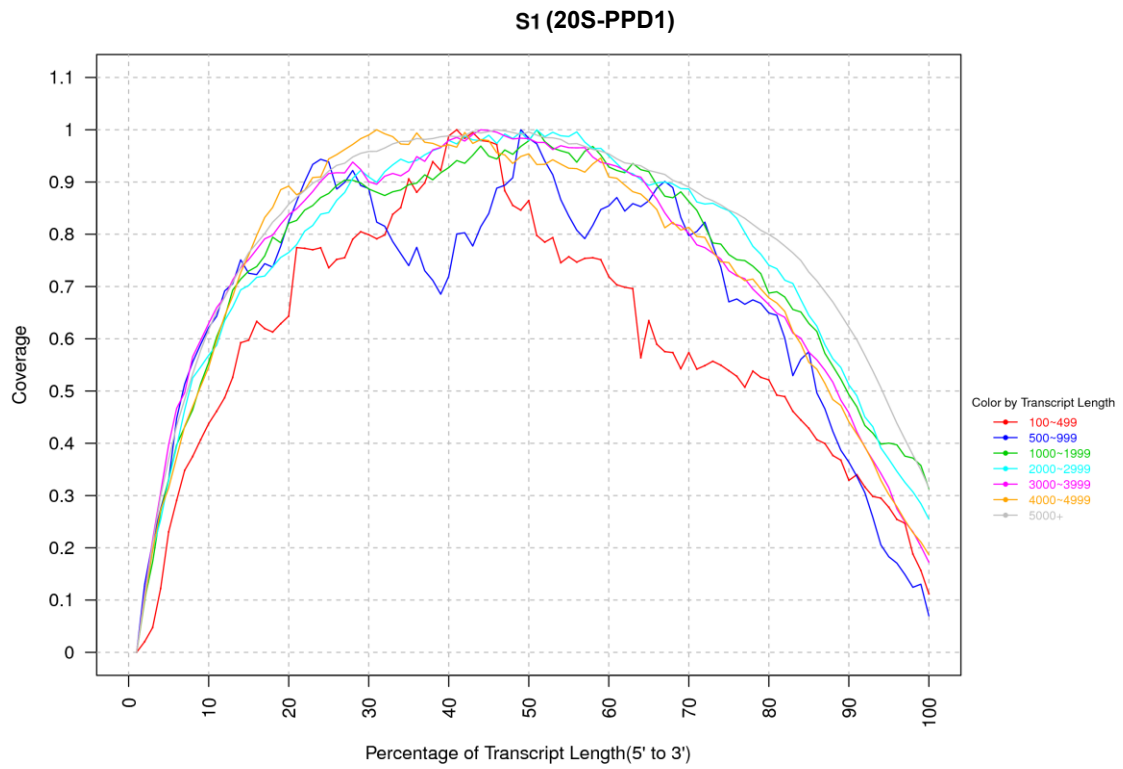

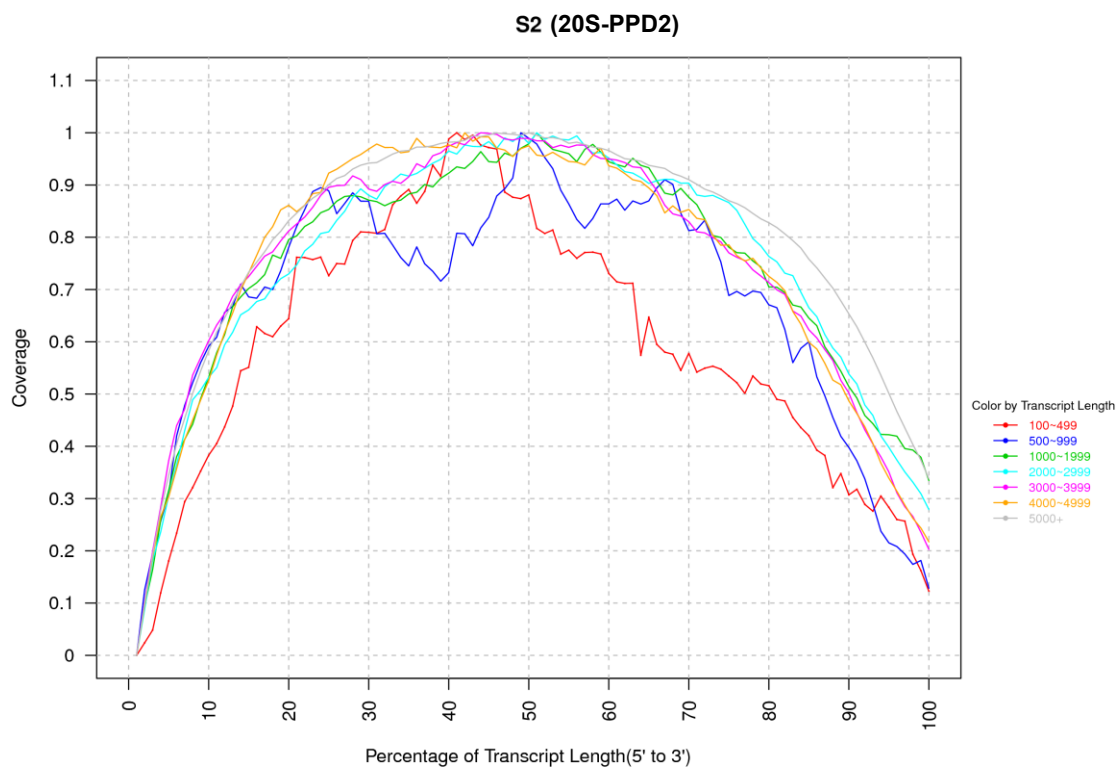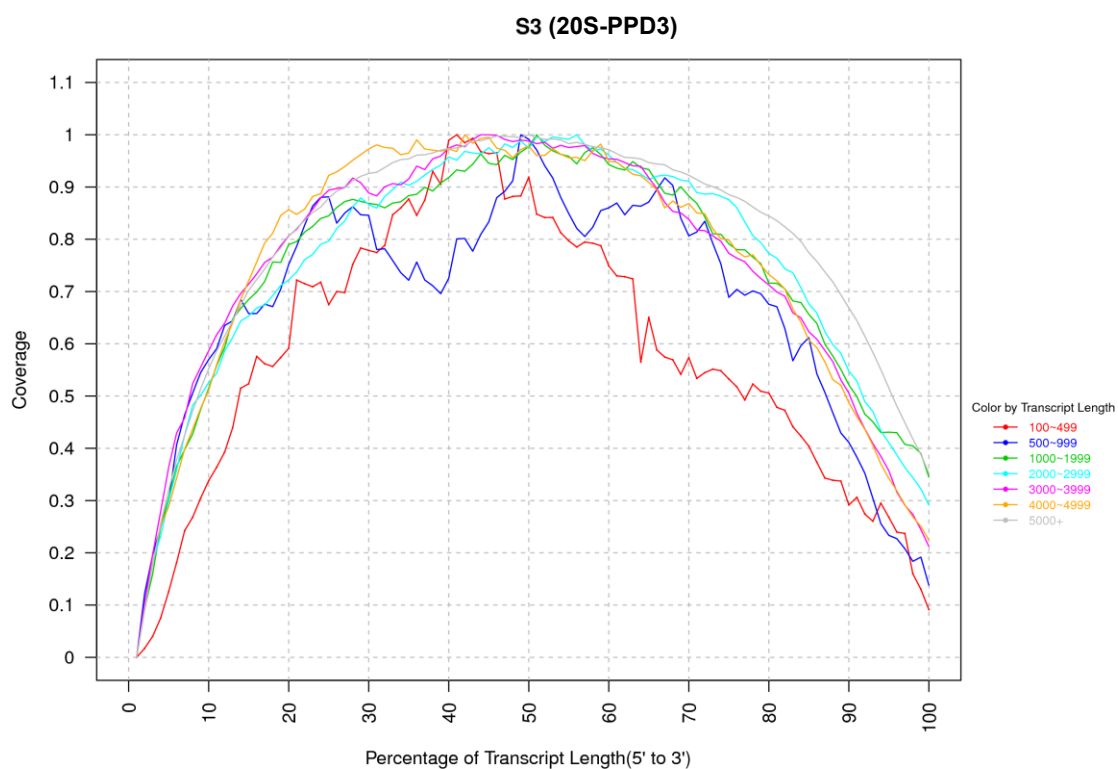

Supplement: s1 [file s1]
